1 **Long Non-Coding RNA *LncKdm2b* Regulates Cortical Neuronal Differentiation by**  
2 ***Cis*-Activating *Kdm2b***

3

4 **Wei Li<sup>1,3</sup>, Wenchen Shen<sup>1,3</sup>, Bo Zhang<sup>1</sup>, Kuan Tian<sup>1</sup>, Yamu Li<sup>1</sup>, Lili Mu<sup>1</sup>, Zhiyuan Luo<sup>1</sup>,**  
5 **Xiaoling Zhong<sup>1</sup>, Xudong Wu<sup>2</sup>, Ying Liu<sup>1</sup>, Yan Zhou<sup>1\*</sup>**

6 <sup>1</sup>College of Life Sciences, Medical Research Institute at School of Medicine, Wuhan  
7 University, Wuhan 430072, China

8 <sup>2</sup>Department of Cell Biology, Tianjin Medical University, Qixiangtai Road 22, Tianjin  
9 300070, China

10 <sup>3</sup>Equal contribution

11 \*Correspondence: yan.zhou@whu.edu.cn

12

13 **Abstract**

14 The mechanisms underlying spatial and temporal control of cortical neurogenesis of the  
15 brain are largely elusive. Long non-coding RNAs (lncRNAs) have emerged as essential  
16 cell fate regulators. Here we found *LncKdm2b* (also known as *Kancr*), a lncRNA  
17 divergently transcribed from a bidirectional promoter of *Kdm2b*, is transiently expressed  
18 during early differentiation of cortical projection neurons. Interestingly, *Kdm2b*'s  
19 transcription is positively regulated *in cis* by *LncKdm2b*, which has intrinsic-activating  
20 function and facilitates a permissive chromatin environment at the *Kdm2b*'s promoter by  
21 associating with hnRNPAB. Lineage tracing experiments and phenotypic analyses  
22 indicated *LncKdm2b* and *Kdm2b* are crucial in proper differentiation and migration of  
23 cortical projection neurons. Moreover, KDM2B exerts its role relying on its leucine-rich  
24 repeats (LRR) but independent of its PRC1-related function. These observations unveiled  
25 a lncRNA-dependent machinery in regulating cortical neuronal differentiation.

26

## 27 **Introduction**

28 The mammalian cerebral cortex, also known as the neocortex, is a six-layered structure  
29 and responsible for performing the most sophisticated cognitive and perceptual functions  
30 such as sensory perception, generation of motor commands, conscious thought and  
31 language. The adult neocortex comprises a plethora of projection neurons, interneurons  
32 and glial cells. Projection neurons (PNs) are the main functional units, expressing  
33 excitatory neurotransmitters, with their long axons projecting into subcortical regions or  
34 contralateral cortex of the brain. In mice, cortical PNs are largely generated between  
35 embryonic (E) day 11.5 to E17.5 indirectly from radial glial progenitor cells (RGPCs),  
36 whose nuclei lie in the region close to the lateral ventricles, ventricular zone (VZ). RGPCs  
37 usually divide asymmetrically to self-renew and simultaneously give rise to intermediate  
38 progenitor cells (IPCs), which are multipolar and reside basally to RGPCs in the  
39 subventricular zone (SVZ). IPCs divide symmetrically to generate either two IPCs or two  
40 postmitotic PNs. PNs then migrate radially along the basal processes of RGPCs to  
41 propagate the cortical plate (CP) in the basal part of the cortex, which eventually forms  
42 cortical layers (Fietz and Huttner, 2011; Kwan et al., 2012). Many cellular and molecular  
43 aspects governing cortical neurogenesis have been extensively studied, including cell-  
44 autonomous and non-autonomous regulation of RGPCs' asymmetric cell division,  
45 neuronal fate commitment, as well as PNs' radial migration (Ayala et al., 2007; Greig et  
46 al., 2013; Imayoshi and Kageyama, 2014). However, mechanisms that control the initial  
47 numbers and proliferation rates of RGPCs, as well as the proliferative or neurogenic  
48 choices of IPCs, are largely elusive (Greig et al., 2013; Homem et al., 2015).

49

50 Recent studies indicate a few long non-coding RNAs could be essential cell fate regulators  
51 in development (Grote et al., 2013; Klattenhoff et al., 2013). Long non-coding RNAs

52 (lncRNAs), defined as RNAs longer than 200 nucleotides but lacking protein-coding  
53 potentials, are abundant in brain and display cell-type-, and developmental stage-specific  
54 expression patterns compared to protein-coding transcripts (Aprea et al., 2013; Belgard  
55 et al., 2011; Mercer et al., 2010; Molyneaux et al., 2015). LncRNAs may regulate gene  
56 transcription by recruiting transcription factors, RNA-binding proteins and chromatin-  
57 remodeling machineries to the site of transcription and creating a locus-specific  
58 environment (Lin et al., 2014; Ng et al., 2013; Wang et al., 2015). LncRNAs are often  
59 derived from bidirectional promoters, such that initiating Pol II can generate divergently-  
60 oriented transcripts simultaneously, the sense (protein-coding mRNA) direction or the  
61 upstream-antisense (divergent non-coding) direction, with these mRNA/divergent lncRNA  
62 pairs having coordinated expression (Lepoivre et al., 2013; Scruggs and Adelman, 2015;  
63 Sigova et al., 2013). Moreover, the transcription of divergent lncRNAs could affect the  
64 expression of their neighboring protein-coding transcripts *in cis* (Luo et al., 2016; Ørom et  
65 al., 2010). Anti-sense promoters could serve as platforms for transcription factor (TF)  
66 binding and facilitate establishment of proper chromatin architecture to regulate sense-  
67 strand mRNA expression (Scruggs and Adelman, 2015; Scruggs et al., 2015). Although  
68 divergent lncRNAs are prevalent in both embryonic and adult nervous system, only a few  
69 functional divergent lncRNAs have been characterized, including roles of *Emx2OS* and in  
70 regulating the expressions of their neighboring protein-coding transcripts *Emx2*, an  
71 essential cortical RGPC gene (Noonan et al., 2003; Spigoni et al., 2010). Furthermore,  
72 these are largely in *in vitro* studies and it's still lack of *in vivo* evidence showing the  
73 significance of divergent lncRNAs in cortical neuronal differentiation (Wang et al., 2017).

74

75 Here we characterized *LncKdm2b* (also known as *Kancr* - **K***dm2b* upstream-**a**ntisense  
76 **n**on-**c**oding **R**NA), a divergent lncRNA that can positively regulate the transcription of  
77 *Kdm2b in cis*. Both *LncKdm2b* and *Kdm2b* are transiently expressed in committed

78 neuronal precursors and newborn cortical PNs and essential for their proper differentiation.  
79 *LncKdm2b* cis-regulates *Kdm2b*'s expression and facilitates a permissive chromatin  
80 environment by binding to hnRNPAB. Our findings advance understandings of molecular  
81 events that govern cortical neuronal differentiation and might have general implications in  
82 regulation of cell differentiation.

83

## 84 **Results**

### 85 ***LncKdm2b* and *Kdm2b* are Transiently Expressed in Committed Neuronal** 86 **Precursors and Newborn Cortical Projection Neurons**

87 In an effort to identify pairs of divergent lncRNA/protein-coding transcript that exert roles  
88 in cortical neurogenesis of the mouse brain, we analyzed a database comprising both in-  
89 house and publicized transcriptome data of developing mouse cerebral cortex (dorsal  
90 forebrain). In-house data are RNA-seq data from embryonic (E) day 10.5 and E12.5 dorsal  
91 forebrain. We also included RNA-seq data of mouse embryonic stem cells (mESCs),  
92 mESCs derived neural progenitor cells (NPCs), and tissues from later stages of cortical  
93 development including E14.5 ventricular zone (VZ), subventricular and intermediate zone  
94 (SVZ/IZ) and cortical plate (CP), E17.5 and adult cortex (Ayoub et al., 2011; Dillman et al.,  
95 2013; Guttman et al., 2010; Ramos et al., 2013). Interestingly, protein-coding genes  
96 associated with divergent lncRNAs within 5 kilobase from their transcription start sites  
97 (TSS) are highly enriched for signatures including transcription, cell cycle progression and  
98 catabolic process (Figure 1 - figure supplement 1A, Supplementary file 1 - Table 1),  
99 indicating their related roles (Ponjavic et al., 2009). One of these pairs is *Kdm2b* and its  
100 divergent non-coding transcript *LncKdm2b* (also known as *Kancr* and *A930024E05Rik*)  
101 (Diez-Roux et al., 2011; Liu et al., 2017; Saba et al., 2015). *LncKdm2b* is transcribed at  
102 262 base pair upstream of *Kdm2b*'s TSS, and is predicted to be a lncRNA according to its  
103 low score in coding potential and inability to translate proteins (Figure 1 - figure



104 supplement 1B-1C). The expression of *LncKdm2b* peaks in E14.5 SVZ/IZ, where IPCs  
105 and migrating PNs reside. Similarly, the expression of *Kdm2b* in E14.5 SVZ/IZ is slightly  
106 higher than that in E14.5 VZ and CP (Figure 1 - figure supplement 1D). Notably, *LncKdm2b*  
107 is expressed at higher levels than *Kdm2b* in E14.5 VZ and SVZ/IZ and at comparable  
108 levels in other stages (Figure 1 - figure supplement 1D), which is contradictory to the  
109 common notion that divergent lncRNAs are expressed at much lower levels than their  
110 neighboring protein-coding transcripts (Sigova et al., 2013). Consistently, quantitative RT-  
111 PCR and immunoblotting experiments showed expression levels of both KDM2B and  
112 *LncKdm2b* peak in E12.5 and E14.5 dorsal forebrains, with much lower levels in E10.5  
113 and adult stages (Figure 1 - figure supplement 1E-1F, Figure 1 - figure supplement 1M).  
114 This pattern is quite similar to those of *Tbr2*, *Dcx*, *Unc5d* and *Neurod1*, markers for IPCs  
115 and immature PNs (Figure 1 - figure supplement 1G-1M). Northern blot detected a ~1.8  
116 kb band in poly(A) RNAs extracted from E14.5 and E16.5 cortices (Figure 1 - figure  
117 supplement 1N). Through analyzing the ENCODE database (Yue et al., 2014), we found  
118 the genomic region spanning the promoter of *Kdm2b* and its immediate upstream region  
119 that transcribes *LncKdm2b* is evolutionarily conserved across mammals, and is  
120 associated with Pol II (RNA polymerase II) and H3K4me3 in E14.5 mouse brain, indicating  
121 active transcription at this condition (Figure 1A). *In situ* hybridization (ISH) revealed that  
122 both *LncKdm2b* and *Kdm2b* are predominantly expressed in the upper SVZ of the E16.5  
123 dorsal forebrain, with the apical side of ISH signals overlapping with TBR2, an SVZ marker  
124 labeling intermediate cortical neural precursors (IPCs) (Figure 1B, S1O-S1P); and basal  
125 side overlapping with TUJ1, a marker for fate-determined pyramidal neurons (Figure 1 -  
126 figure supplement 1P). These data suggest both *LncKdm2b* and *Kdm2b* are transiently  
127 expressed in committed IPCs and freshly differentiated projection neurons during the peak  
128 of cortical neurogenesis.

129

130 ***Kdm2b*-expressing Cortical Cells are Fated to be Cortical Projection Neurons**

131 To further validate *Kdm2b*'s expression and the fate of *Kdm2b*-expressing cells during  
132 cortical neurogenesis, we generated a knock-in mouse line, *Kdm2b-F2a-CreERT2-IRES-*  
133 *EGFP* (referred to *Kdm2b<sup>CreERT2</sup>*), in which the *F2a-CreERT2-IRES-EGFP* cassette was  
134 inserted in frame into the third exon of *Kdm2b* (Figure 1C). Southern blotting and genomic  
135 PCR validated the predicted genomic modification (Figure 1 - figure supplement 1Q).  
136 Expressions of CreERT2 and EGFP are driven by the endogenous *Kdm2b* promoter,  
137 which would allow us to perform detailed expression analyses and lineage tracing  
138 experiments for *Kdm2b*. Brain sections from embryos derived from mating of  
139 *Kdm2b<sup>CreERT2/+</sup>* with wild-type (WT) C57/B6 were subjected to immunofluorescent staining.  
140 Consistent with ISH experiments, EGFP<sup>+</sup> cells reside in upper SVZ and lower intermediate  
141 zone (IZ), overlapping with both TBR2<sup>+</sup> IPCs and TUJ1<sup>+</sup> projection neurons (Figure 1D,  
142 S1R). Moreover, a large portion of EGFP<sup>+</sup> cells also overlap with UNC5D, a marker for  
143 multipolar cells in embryonic SVZ/IZ and layer IV projection neurons (Figure 1 - figure  
144 supplement 1S). Notably, EGFP<sup>+</sup> signals extend more basally than *Kdm2b* or *LncKdm2b*  
145 ISH signaling, probably because EGFP protein is more stable than transcripts of *Kdm2b*  
146 or *LncKdm2b*. We next bred *Kdm2b<sup>CreERT2/+</sup>* with the *Ai14 (Rosa-CAG-LoxP-STOP-LoxP-*  
147 *tdTomato-WPRE)* reporter mice. Pregnant female mice were injected with tamoxifen at  
148 various stages to enable the excision of the STOP cassette, thus leading to tdTomato  
149 expression in the progenies of *Kdm2b*-expressing cells. Cortices were collected from  
150 E16.5 and newborn (P0) pups for immunofluorescent staining of SATB2 (a marker for layer  
151 2-4 callosal neurons) and CTIP2 (a marker for layer 5 subcortical neurons). Interestingly,  
152 most tdTomato-positive cells express either SATB2 ( $51.0 \pm 2.5\%$  at E16.5,  $63.1 \pm 2.5\%$  at  
153 P0) or CTIP2 ( $20.7 \pm 5.4\%$  at E16.5,  $7.0 \pm 2.3\%$  at P0), suggesting the progenies of  
154 *Kdm2b*-expressing cells are largely projection neurons (Figure 1 - figure supplement 2A-

155 2D). Of note, the Cre recombinase could be randomly activated in neural epithelial (NE)  
156 cells of *Kdm2b*<sup>CreERT2/+</sup>; *Ai14* mice in the absence of tamoxifen, thus confounding the  
157 analysis of lineage-tracing data (Figure 1 - figure supplement 2E-2F). Nonetheless, by P7,  
158 tdTomato-positive cells largely express SATB2 (63.6 ± 4.8%) and/or CTIP2 (44.3 ± 5.8%)  
159 (Figure 1 - figure supplement 2G-2H). To overcome the issue, we electroporated the LoxP-  
160 STOP-LoxP-DsRed (pCALNL) reporter plasmid into the E12.5 *Kdm2b*<sup>CreERT2/+</sup> cortices  
161 followed by tamoxifen injection six hours after electroporation. In line with genetic lineage-  
162 tracing data, the majority DsRed-positive cells express either SATB2 (71.9% ± 1.5%) or  
163 CTIP2 (18.2% ± 7.1%) (Figure 1E). The above expression and lineage-tracing results  
164 suggest *Kdm2b* and *LncKdm2b* are transiently expressed in differentiating IPCs and  
165 freshly born PNs and might regulate neuronal differentiation during cortical neurogenesis.

166

### 167 ***LncKdm2b* Regulates *Kdm2b*'s Expression *in cis***

168 The close proximity of *Kdm2b* and *LncKdm2b*'s TSS and their identical expression  
169 patterns in developing cortices prompted us to examine if *LncKdm2b* regulates *Kdm2b*'s  
170 expression. Since it's impractical to maintain intermediate progenitor cells or immature  
171 projection neurons *in vitro*, we utilized a few primary or immortalized cells that express  
172 both *Kdm2b* and *LncKdm2b* to address the issue. First, we transduced Neuro-2a  
173 neuroblastoma cells with *LncKdm2b* antisense oligonucleotides (ASOs), which mediate  
174 RNA degradation *via* the RNase H-dependent mechanism (Vickers et al., 2003; Walder  
175 and Walder, 1988). The levels of *Kdm2b*'s transcripts and protein were significantly  
176 decreased upon the ASO treatment (Figure 2A-2B). Consistently, knockdown of  
177 *LncKdm2b* by ASO or shRNAs in adherent cultured cortical cells leads to decreased  
178 *Kdm2b* expression (Figure 2C, Figure 2 - figure supplement 1A-1B). Next, we applied the  
179 CRISPR/Cas9 technique to delete the genomic region of *LncKdm2b*'s second exon in NE-  
180 4C mouse neural stem cells (*LncKdm2b*<sup>exon2-KO</sup>), which results in compromised expression

181 of *LncKdm2b* and *Kdm2b* (Figure 2D, Figure 2 - figure supplement 1D). Notably, there're  
182 significant amounts of transcripts derived from *LncKdm2b*'s first and third exons in  
183 *LncKdm2b*<sup>exon2-KO</sup> cells (Figure 2D). However, the expression levels of *Zfp292*, the  
184 downstream target of *LncKdm2b* in ILC3 cells (Liu et al., 2017), were not decreased upon  
185 *LncKdm2b* depletion, suggesting a cell-type-specific effects by *LncKdm2b* (Figure 2 -  
186 figure supplement 1C, Figure 2 - figure supplement 1E). Therefore, *LncKdm2b* maintains  
187 *Kdm2b*'s expression in neural cells.

188

189 Cross-talk among neighboring genes could involve *trans*- and/or *cis*-regulatory  
190 mechanisms, the latter including enhancer-like activity of gene promoters, the process of  
191 transcription, and the splicing of the transcript (Bassett et al., 2014; Engreitz et al., 2016;  
192 Yin et al., 2015). To discriminate these possibilities, four polyadenylation sequences (pAS)  
193 were inserted 1.8 kb downstream of *LncKdm2b*'s TSS to prematurely terminate its  
194 transcription in one allele of mouse C57/B6 embryonic stem cells (mESC<sup>*LncKdm2b*-pAS/+</sup>), but  
195 to keep undisturbed the essential promoter region for *Kdm2b* and *LncKdm2b*'s  
196 transcription, which is DNase I hypersensitive (HS) (Figure 2E). Consistently, the  
197 expressions of *LncKdm2b* and *Kdm2b* were significantly decreased upon pAS insertion  
198 (Figure 2E), suggesting *LncKdm2b*'s transcription process and/or transcripts themselves  
199 are required for *Kdm2b*'s expression. We next studied if *LncKdm2b* maintains *Kdm2b*'s  
200 transcription *in cis*. First, subcellular fractionation followed by RT-qPCR and RNA ISH  
201 assays revealed that most *LncKdm2b* resides in the cytosol with a fraction in the nuclei of  
202 cortical cells (Figure 2 - figure supplement 1F-1G). Next, we genetically modified  
203 mESC<sup>*LncKdm2b*-pAS/+</sup> cells so that indels were created in the second exon of *Kdm2b* in an  
204 allele-specific manner. Quantitative RT-PCR experiments of the two clones (1B1 and 2D5)  
205 showed it's the allele with pAS insertion has significantly lower *Kdm2b* transcription than  
206 the other allele (Figure 2F). Lastly, nuclear extracts from *LncKdm2b*-depleted Neuro-2a

207 cells were collected and subjected to nuclear run-on assay. Data showed depletion of  
208 *LncKdm2b* results in significantly lower yield of *Kdm2b* nascent transcripts (Figure 2G). In  
209 contrast, overexpressing *LncKdm2b in trans* didn't elevate *Kdm2b*'s transcripts' levels  
210 (Figure 2 - figure supplement 1H). In summary, these results validate *LncKdm2b*'s role in  
211 maintaining *Kdm2b* transcription *in cis*.

212

### 213 ***LncKdm2b* Modulates the Configuration of *Kdm2b*'s *Cis*-regulatory elements**

214 Specific gene expression is coordinated by *cis*-regulatory elements such as the  
215 promoter/enhancer, cell-type-specific transcription factors and chromatin states  
216 (Heintzman et al., 2009; Perino and Veenstra, 2016). To understand these mechanisms  
217 underlying *Kdm2b* transcription, we first analyzed the genomic region both upstream and  
218 downstream of the *Kdm2b* and *LncKdm2b*'s TSS. This genome region contains multiple  
219 active and/or repressive epigenetic modifications including DNase I HS, H3K27ac  
220 (indicative of active enhancers), H3K4me1 (active or poised enhancers), H3K27me3  
221 (repressive or poised *cis*-elements), and CTCF-association (insulators) in developing  
222 mouse brain (Vierstra et al., 2014; Yue et al., 2014), suggesting it may contain putative  
223 *cis*-regulatory sequences (enhancers) for *Kdm2b* (T1 to T7, Figure 3A). Since *cis*-  
224 regulatory elements/enhancers can be recruited spatially adjacent to promoters to control  
225 gene expression, we performed the chromosome conformation capture (3C) followed by  
226 qPCR experiments and identified a peak of high crosslinking frequency at the H3K4me1-  
227 enriched T5 locus (5.9 kb upstream of *Kdm2b*'s TSS) when using a constant EcoR I  
228 fragment located close to the *Kdm2b*'s promoter (Figure 3B), indicating the T5 locus is  
229 significantly associated with *Kdm2b*'s promoter. Interestingly, depletion of *LncKdm2b*  
230 significantly attenuated the association between T5 and *Kdm2b*'s TSS, suggesting  
231 transcribed *LncKdm2b* maintains *Kdm2b*'s expression by inducing a local 3D chromatin  
232 structure to bring close *Kdm2b*'s enhancer and promoter (Figure 3B). In addition,

233 luciferase (Luc) assays revealed that the 1.67 kb-long DNA fragment containing the T5  
234 locus has strong enhancer/promoter activities in Neuro-2a cells when it was reversely  
235 placed (opposite of *Kdm2b*'s transcription direction) at 5' of the firefly Luc cassette (Figure  
236 3C). We further narrowed the T5 locus to an evolutionarily conserved 484 bp-long region  
237 (T5-mini) and revealed this fragment can also significantly drive Luc expression if  
238 reversely placed at 5' of the firefly Luc cassette. In line with the T5 locus being an  
239 evolutionarily conserved *cis*-regulatory element, both mouse T5 and T5-mini sequences  
240 are able to drive reporter gene expression in human HEK293T cells (Figure 3 - figure  
241 supplement 1A).

242

243 To validate if the genomic region embedded with the T5 element is sufficient to initiate  
244 spatiotemporal transcription in cortices, we cloned a piece of 8.0 kb genomic DNA (*KUS*  
245 – *Kdm2b* upstream sequence, -0.6 kb to +7.3 kb relative to *Kdm2b*'s TSS) from the mouse  
246 genome. *In utero* electroporation assay revealed that this genomic region alone can  
247 efficiently drive the expression of short-lived d2EGFP (Corish and Tyler-Smith, 1999) in  
248 embryonic cortices at either orientation with a pattern reminiscent of endogenous *Kdm2b*  
249 or *LncKdm2b* (Figure 3D). In addition, we found the T5 region is essential for *Kdm2b*'s  
250 expression, as genomic deletion of T5 leads to compromised *Kdm2b*'s expression in NE-  
251 4C cells and in cortical cells (Figure 3E-3F, Figure 3 - figure supplement 1B-1D). Together,  
252 these data indicate the *Kdm2b*'s upstream region contains evolutionarily conserved *cis*-  
253 regulatory elements essential for expression of *Kdm2b* and *LncKdm2b*, and its  
254 configuration is modulated by *LncKdm2b*.

255

### 256 ***LncKdm2b* Facilitates a Permissive Chromatin Environment for *Kdm2b*'s** 257 **Expression by Associating with hnRNPAB**

258 In order to test whether *LncKdm2b* displays intrinsic ability to promote gene expression,

259 we used the Gal4- $\lambda$ N/BoxB system to tether this lncRNA to a heterologous reporter  
260 promoter (Figure 4 - figure supplement 1A) (Li et al., 2013; Trimarchi et al., 2014; Wang  
261 et al., 2011a). The data showed the full-length *LncKdm2b* and its evolutionarily conserved  
262 5' part (1-908 nt, transcribed from *LncKdm2b* gene's first and second exons) could  
263 enhance luciferase activities in a dosage-dependent manner, whereas its less conserved  
264 3' part (909-1896 nt) couldn't (Figure 4 - figure supplement 1B-1D). Therefore, the 5'  
265 conserved part of *LncKdm2b*'s transcript bears intrinsic-activating function. *LncKdm2b*'s  
266 intrinsic-activating capability could be due to its association with *trans*-factor(s). We carried  
267 out RNA pull-down experiments using biotinylated *LncKdm2b* and antisense-*LncKdm2b*  
268 RNAs. RNA pull-down assay was performed using nuclear protein extracts from cortical  
269 NPCs followed by mass spectrometry (MS). A number of RNA binding proteins were  
270 enriched in *LncKdm2b*-precipitating extracts compared to those precipitated by antisense  
271 *LncKdm2b* (Supplementary file 1 - Table 2). One of the most enriched protein is  
272 heterogeneous nuclear ribonucleoprotein A/B (hnRNPAB), which is validated by RNA pull-  
273 down followed by immunoblotting (Figure 4A-4B). Notably, SATB1, the protein partner of  
274 *LncKdm2b* in group 3 innate lymphoid cells (ILC3) cells (Liu et al., 2017), was not identified  
275 to be associated with *LncKdm2b* in this study, probably due to cellular specificity.  
276 hnRNPAB is dynamically expressed during brain development and has implications in  
277 neuronal differentiation (Sinnamon et al., 2012). Depletion of *Hnrnpab* in Neuro-2a cells  
278 significantly decreased *Kdm2b*'s expression (Figure 4 - figure supplement 1E). In control  
279 experiments, knockdown the expression of *Dhx9*, *Satb1*, *Bptf*, *Hnrnpa2b1*, *Hnrnpa3*, *Dhx5*,  
280 *Ncl* or *Lmnb1*, genes encoding other putative *LncKdm2b*-associated proteins, had no  
281 significant effect on *Kdm2b*'s expression (Figure 4 - figure supplement 1E). RNA *in situ*  
282 hybridization followed by immunofluorescent staining showed colocalization of *LncKdm2b*  
283 and hnRNPAB in cortical NPCs (Figure 4 - figure supplement 1F). RNA  
284 immunoprecipitation experiments (RIP) in either native or the formaldehyde-fixed



285 condition confirmed association of hnRNPAB with *LncKdm2b* but not with *Actb* or *Gapdh*  
286 RNAs (Figure 4C-4D).

287

288 In line with the fact that the 5' conserved part of *LncKdm2b* has intrinsic-activating function  
289 (Figure 4 - figure supplement 1B-1D), *in vitro* binding experiments indicated the two 5'  
290 conserved regions (1-454 nt and 455-905 nt) of *LncKdm2b* could interact with hnRNPAB,  
291 with the 455-905 nt region having stronger association with hnRNPAB than the 1-454 nt  
292 region. On the other hand, the 3' non-conserved region (909-1391nt and 1392-1872 nt)  
293 couldn't associate with hnRNPAB (Figure 4E). RNA structure analysis using *RNAfold*  
294 predicts two stem-loops in the 455-905 nt region (Figure 4 - figure supplement 1G).  
295 Particularly, the stem-loop 1 (463-625 nt) has two hairpin arms, P1 and P2 (Figure 4F). To  
296 ask if these hairpin arms are required for the interaction between *LncKdm2b* and  
297 hnRNPAB, we mutated a few nucleotides to disrupt the hairpin formation (Figure 4F). In  
298 *in vitro* binding experiments indeed showed disruption of the hairpin formation in P1 would  
299 greatly compromised the interaction (Figure 4G). Moreover, restoration of the P1 hairpin  
300 (P1 rescue) would partially rescue the association, but the P2 hairpin or the stem-loop 2  
301 (840-918 nt) is not required for the association of *LncKdm2b* with hnRNPAB. The EMSA  
302 (electrophoretic mobility shift assay) experiment further validated the binding of  
303 *LncKdm2b*'s stem-loop 1 region (463-625nt) to hnRNPAB (Figure 4H). Together, these  
304 analyses revealed that the hairpin P1 of *LncKdm2b*'s conserved 5' part directly interacts  
305 with hnRNPAB, which might be responsible for *LncKdm2b*'s intrinsic-activating function  
306 (Figure 4 - figure supplement 1B-1D).

307

308 HnRNPAB, also known as CArG box-binding factor-A (CBF-A), is an RNA binding protein  
309 with transcription activity (Venkov et al., 2007; Zhou et al., 2014). We went on to ask if  
310 hnRNPAB binds to genomic regions essential for *Kdm2b* expression, and if the binding is



311 regulated by *LncKdm2b*. CHIP-qPCR showed hnRNPAB binds to multiples sites in the  
312 *Kdm2b*'s promoter and the T5 region, many of which were positively regulated by  
313 *LncKdm2b* (Figure 4 - figure supplement 1H, Figure 4I-4L). The reporter activity driven by  
314 *Kdm2b*'s promoter (*pKdm2b*) is mediated by the hnRNPAB-binding CArG box.  
315 Downregulating hnRNPAB would significantly lower *pKdm2b*'s reporter activity, whereas  
316 exert no effect on CArG box-deleted *pKdm2b* (Figure 4M). Moreover, the association  
317 between the T5 and *Kdm2b*'s TSS was significantly compromised upon hnRNPAB  
318 depletion (Figure 4N). Finally, the *Kdm2b*'s promoter (-78 bp to -20 bp relative to *Kdm2b*'s  
319 TSS) was less enriched for H3K4me3 and H3K27ac, two histone markers indicative of  
320 active transcription, in *LncKdm2b*-depleted Neuro-2a cells (Figure 4O-4P). Collectively,  
321 *Kdm2b*'s expression correlates positively with the association between *Kdm2b*'s promoter  
322 and an essential enhancer (T5), which is facilitated by *LncKdm2b*'s transcripts and its  
323 associated protein hnRNPAB. These findings point a role of *LncKdm2b* in regulating  
324 transcription locally.

325

### 326 **KDM2B Promotes Cortical Neuronal Differentiation**

327 Since *LncKdm2b* regulates the expression of *Kdm2b*, and *Kdm2b* is transiently expressed  
328 in freshly born projection neurons, we next explored roles and mechanisms of KDM2B in  
329 cortical neurogenesis. We first electroporated E13.5 embryonic cortices with plasmids  
330 overexpressing *Kdm2b* and collected brains at E15.5 (Figure 5 - figure supplement 1A).  
331 Significantly more *Kdm2b* transduced cells reside in the cortical plate (CP, future cortices)  
332 with fewer cells in the VZ/SVZ, indicating accelerated cortical neurogenesis and radially  
333 neuronal migration (Figure 5A-5B). In line with this, fewer mCherry+ *Kdm2b* transduced  
334 cells express TBR2 and PAX6, markers for IPCs and RGPCs respectively (Figure 5C-5E).  
335 Embryonic brains of *Kdm2b*<sup>CreERT2/CreERT2</sup> mice have significant amount of residual KDM2B  
336 protein probably due to inefficient transcriptional termination (Figure 5 - figure supplement

337 1B), which might lead to subsequent use of alternative start codons. We therefore  
338 performed *Kdm2b* loss-of-function studies by electroporating plasmids expressing short-  
339 hairpin RNAs (shRNAs) against *Kdm2b* into E13.5 embryonic cortices. To minimize non-  
340 specific effects, we chose the shmiRNA system to express long RNA hairpins with shRNAs  
341 embedded into endogenous miRNA loop and flanking sequences (Baek et al., 2014; Bauer  
342 et al., 2009). Significant more *Kdm2b*-shRNA electroporated cells reside in the VZ/SVZ at  
343 E16.5 (Figure 5F-5G). Next, E16.5 *Kdm2b*-shRNA transduced cortices were immuno-  
344 stained with TBR2 and NEUROD2, a transcriptional factor expressed in cortical PNs.  
345 Results showed more transduced cells are co-labeled with TBR2 but fewer cells express  
346 NEUROD2, with significantly more NEUROD2+ transduced cells localized in the VZ/SVZ  
347 (Figure 5H-5I, Figure 5 - figure supplement 1C-1D). Moreover, more transduced cells are  
348 colocalized with PAX6-positive RGPCs (Figure 5J-5K). This phenotype can be fully  
349 rescued by simultaneously overexpressing *Kdm2b* (Figure 5F-5G, Figure 5 - figure  
350 supplement 1E-1F). Furthermore, significantly more *Kdm2b*-depleted cells (EGFP+) are  
351 BrdU positive and in S-phase, as embryos were injected BrdU 30 minutes before sacrifice;  
352 and more PAX6+EGFP+ RGPCs are BrdU positive, suggesting depletion of *Kdm2b*  
353 promotes proliferation of RGPCs (Figure 5L-5N). We didn't observed changes of  
354 programmed cell death (cleaved caspase-3+ cells) in *Kdm2b*-shRNA transduced cortices  
355 (Figure 5 - figure supplement 1G). All these data support the notion that KDM2B promotes  
356 cortical neuronal differentiation *in vivo* (Supplementary file 1 - Table 3).

357

### 358 **KDM2B Depends on its Leucine-rich Repeats to Promote Cortical Neuronal** 359 **Differentiation**

360 KDM2B contains multiple functional domains, including the JmjC histone demethylase  
361 domain, a DNA-binding CxxC zinc finger, an F-box domain, a PHD finger, and eight  
362 leucine-rich repeats (LRRs). The F-box and the LRR domain are required for variant

363 polycomb repressor complex 1 (PRC1) recruitment and assembly (Farcas et al., 2012; He  
364 et al., 2013; Inagaki et al., 2015; Wu et al., 2013). To decipher how KDM2B exerts its  
365 function in cortical development, we carried out rescue experiments using *in utero*  
366 electroporation (Figure 6A-6D). E13.5 cortices were co-electroporated with plasmids  
367 expressing shRNA against *Kdm2b* along with plasmids expressing different KDM2B  
368 truncations or mutations (Figure 6 - figure supplement 1A). Intriguingly, expressing  
369 KDM2B with JmjC mutation (lacking methyl-transferase activity), PHD mutation; CxxC, or  
370 F-box deletion individually could fully rescue hampered radial migration (judged by relative  
371 positions of transduced cells) and enhanced RGPCs self-renewal (determined by PAX6+  
372 transduced cells) caused by *Kdm2b* depletion, whereas the LRR-deleted KDM2B  
373 (KDM2B- $\Delta$ LRR) could not rescue the defect (Figure 6A-6D). Moreover, overexpressing  
374 the KDM2B- $\Delta$ LRR alone also leads to delayed neuronal differentiation and radial migration,  
375 and enhanced self-renewal of RGPCs (Figure 6E-6G), suggesting the LRR domain is  
376 indispensable for KDM2B's role in promoting cortical neuronal differentiation and KDM2B-  
377  $\Delta$ LRR overexpression caused a dominant-negative effect (Supplementary file 1 - Table 3).

378

379 It has been reported that the LRR domain is essential for KDM2B to recruit and assemble  
380 the PRC1; and depletion of RING1B, the catalytic component of PRC1, in mice leads to  
381 prolonged neurogenic phase of NPCs and delaying of the onset of the astrogenic phase  
382 (Hirabayashi et al., 2009; Morimoto-Suzuki et al., 2014). To study if KDM2B relies on PRC1  
383 to exert its role, we electroporated plasmids expressing catalytic inactive RING1B (I53A)  
384 into the E13.5 cortices. Although this mutation ablates RING1B's ability to act as an E3  
385 ligase *in vitro* (Buchwald et al., 2006), it does not perturb the incorporation of RING1B into  
386 canonical and variant PRC1 (Illingworth et al., 2012). Surprisingly, the neurogenic process  
387 is unaltered by E16.5 (Figure 6 - figure supplement 1B-1E). Moreover, whole-body  
388 inactivation of *Kdm2b* in mice doesn't lead to reduction of H2AK119Ub1, a histone

389 modification mediated by PRC1 complex (Figure 6 - figure supplement 1F-1G). These  
390 results indicate the pro-neurogenic roles exerted by KDM2B is independent of its function  
391 in mediating PRC1 activities.

392

### 393 ***LncKdm2b* Promotes Cortical Neuronal Differentiation via KDM2B**

394 As we have shown that *LncKdm2b* is transiently expressed in freshly born projection  
395 neurons and *LncKdm2b* cis-activates *Kdm2b* expression, we expected that *LncKdm2b*  
396 and *Kdm2b* may have similar function on cortical neuronal differentiation. To this end, we  
397 first knocked down the expression of *Kdm2b* or *LncKdm2b* by transfecting adherent-  
398 cultured cortical progenitor cells (NPCs) with low titer lentiviral shRNAs to study cell fate  
399 changes at the clonal level. NPCs depleted with *Kdm2b* or *LncKdm2b* showed enhanced  
400 self-renewal but decreases neuronal differentiation: significantly more *Kdm2b* or  
401 *LncKdm2b*-depleted cortical cells expressing SOX2 with fewer cells expressing TUJ1  
402 compared to scramble shRNA-transfected cells (Figure 7A-7B); more precursor-  
403 containing clones with fewer neuron-containing clones and fewer TUJ1-only neuronal  
404 clones (Figure 7C-7E); and more SOX2+ cells per clone upon *Kdm2b* or *LncKdm2b*  
405 depletion (Figure 7F-7G). Thus, *LncKdm2b* and *Kdm2b* are required for proper neuronal  
406 differentiation of cortical NPCs *in vitro* (Supplementary file 1 - Table 3).

407

408 Next, we explored whether *LncKdm2b* regulates cortical neurogenesis *in vivo* through  
409 *Kdm2b*. E13.5 embryonic cortices were electroporated with siRNAs or antisense  
410 oligonucleotides (ASO) targeting *Kdm2b* or *LncKdm2b* respectively followed by  
411 phenotypic analyses at E16.5. Significantly fewer siKdm2b- or *LncKdm2b* ASO-  
412 transduced cells reside in the CP with more cells in the VZ/SVZ, indicating delayed  
413 neuronal differentiation. In line with this, more transduced cells express PAX6. Most  
414 importantly, overexpressing *Kdm2b* can mostly rescue the phenotypes caused by

415 *LncKdm2b* knockdown (Figure 7H-7J). Finally, we ask if hnRNPAB, the *LncKdm2b*-  
416 associated protein, also regulates neuronal differentiation in developing neocortex. To this  
417 end, we electroporated E13.5 cortices with siRNAs against *Hnrnpab* and indeed found  
418 *Hnrnpab*-depleted cells showed delayed neuronal migration to the CP at E16.5 and  
419 hampered differentiation of NSPCs - more sihnRNPAB-transduced cells localized in the  
420 VZ/SVZ and co-localized with PAX6 (Figure 7K-7M). On the other hand, depletion of  
421 *Hnrnpa2b1* didn't cause such defects (Figure 7 - figure supplement 1A-1C). Moreover,  
422 overexpression of *LncKdm2b* has no effect on neuronal migration and differentiation  
423 (Figure 7 - figure supplement 1D-1E), which is in line with aforementioned data showing  
424 *LncKdm2b* couldn't trans-activate *Kdm2b* expression (Figure 2 - figure supplement 1H).  
425 Together, *LncKdm2b* promotes cortical neuronal differentiation via KDM2B  
426 (Supplementary file 1 - Table 3).

427

428 In summary, we found the precise balance of self-renewal and neuronal differentiation of  
429 NSPCs during cortical neurogenesis is modulated by KDM2B in the LRR-dependent  
430 manner. Moreover, the expression of *Kdm2b* is positively regulated by its divergent  
431 lncRNA *LncKdm2b*, which facilitates a permissive chromatin configuration locally by  
432 bringing together the upstream regulatory *cis*-element T5, *Kdm2b*'s promoter and  
433 hnRNPAB (Figure 7N).

434

## 435 **Discussion**

436 The generation of layer-specific PNs over developmental time is precisely controlled and  
437 largely attributed to cell-intrinsic properties of NSPCs (Gaspard et al., 2008; Shen et al.,  
438 2006). Cell fates choices are mostly the results of specific transcriptional events, which  
439 are coordinated by *cis*-regulatory elements, cell-specific transcription factors, and  
440 epigenetic states including DNA methylation, histone modification and chromatin

441 accessibility (Heintzman et al., 2009; Perino and Veenstra, 2016). Some lncRNAs can  
442 regulate gene transcription locally (*cis*) and/or distally (*trans*) by modifying epigenetic  
443 states (Berghoff et al., 2013; Fu, 2014; Grote et al., 2013; Rinn and Chang, 2012). Here  
444 we found lncRNA gene *LncKdm2b* shares the same promoter with its bidirectional protein-  
445 coding gene *Kdm2b*, and both of them are transiently expressed in committed IPCs and  
446 freshly-born PNs. Unlike most bidirectional coding-noncoding transcripts, *LncKdm2b*'s  
447 expression level is comparable with that of *Kdm2b* at the peak of cortical neurogenesis,  
448 strongly indicating *LncKdm2b*'s regulatory roles. Indeed, *LncKdm2b* maintains *Kdm2b*'s  
449 expression *in cis* in neural cells. Mechanistically, the *LncKdm2b* transcripts enhances  
450 physical association of *Kdm2b*'s promoter and a key enhancer T5 *via* binding to hnRNPAB.  
451 *LncKdm2b*'s transcript, especially its evolutionarily conserved 5' part, bears intrinsic-  
452 activating function and interacts with hnRNPAB *via* one of its putative stem-loop structures  
453 (Figure 4A-4H, S4A-S4D). Similarly, a 5' fragment of *LncKdm2b* (450–700 nt) is necessary  
454 for its binding to SATB1 or SRCAP in ILC3 and ES cells respectively (Liu et al., 2017; Ye  
455 et al., 2018). hnRNPAB, an RNA binding protein with transcription activity (Venkov et al.,  
456 2007; Zhou et al., 2014), was shown to be associated with *Kdm2b*'s TSS and the T5 region  
457 in neural cells, and the strength of the association depends on the presence of *LncKdm2b*  
458 (Figure 4 - figure supplement 1H, Figure 4K-4L). Moreover, the *cis*-activity of *Kdm2b*'s  
459 promoter also relies on hnRNPAB's binding (Figure 4M). The core T5-region (T5-mini), a  
460 conserved *cis*-regulatory element embedded in *LncKdm2b*'s second intron, can drive gene  
461 expression in both mouse and human cells when reversely placed upstream of reporters,  
462 and its deletion results in decreased expression of *Kdm2b*. In summary, this study  
463 indicates a role of lncRNA in coordinating the association of *cis*-regulatory elements  
464 (*Kdm2b*'s TSS and T5) and trans-factor(s) (hnRNPAB) in transcriptional regulation, which  
465 probably relies on RNA's specific secondary structures.

466

467 A recent study by Liu *et al.* showed *LncKdm2b* activates expression of *Zfp292* *in trans* via  
468 recruiting the chromatin organizer SATB1 and the nuclear remodeling factor (NURF)  
469 complex onto the *Zfp292* promoter in innate lymphoid cells (ILCs) (Liu *et al.*, 2017).  
470 Similarly, *LncKdm2b* activates the expression of *Zbtb3* by promoting the assembly and  
471 ATPase activity of the SRCAP complex in mESCs (Ye *et al.*, 2018). Surprisingly, these  
472 studies didn't detect expression alterations of *Kdm2b* in *LncKdm2b*-null ILC3s and mESCs.  
473 In our study, *LncKdm2b* was not found to be associated with SATB1. Furthermore, the  
474 expression levels of *Zfp292* were not decreased in neural cells depleted with *LncKdm2b*  
475 (Figure 2 - figure supplement 1C-1E). These discrepancies could be due to different  
476 cellular context and/or distinct inactivation approaches. *LncKdm2b*'s second exon was  
477 deleted in previous studies to abolish its transcripts, which might not hamper *LncKdm2b*'s  
478 transcription process *per se* and/or *LncKdm2b*'s conserved region with intrinsic-activating  
479 function could still exist. In fact, a good fraction of *LncKdm2b*'s transcripts derived from  
480 the first and third exons could be detected in NE-4C cells with *LncKdm2b*'s second exon  
481 deleted (Figure 2D). In contrast, our study also used siRNAs and ASOs to target  
482 *LncKdm2b*, and inserted pAS sites into *LncKdm2b*'s first intron in mESCs, thus impeding  
483 *LncKdm2b* transcription, ultimately leading to attenuation of *Kdm2b* transcription (Figure  
484 2A-2G). Interestingly, although *LncKdm2b* controls *Kdm2b*'s expression at the  
485 transcriptional level in cell nuclei, a good fraction of *LncKdm2b* transcripts resides in the  
486 cytoplasm. Previous studies also indicated *LncKdm2b* localizes in both nuclei and cytosol  
487 in mESCs and innate lymphoid cells (Liu *et al.*, 2017; Ye *et al.*, 2018). It remains to be  
488 elucidated if *LncKdm2b* functions in cytosol, and if *LncKdm2b*'s cytosolic translocation  
489 would facilitate its decay to ensure *Kdm2b*'s transient expression during neuronal  
490 differentiation. This finding is just the beginning to understand how LncRNAs regulate  
491 cortical neuronal differentiation by controlling local transcription and might have general  
492 implications in cell fate determinations.



493

494 KDM2B, also known as JHDM1B, NDY1 and FBXL10, was initially characterized as a  
495 Jumonji (JmjC) domain containing histone H3K36 di-demethylase. KDM2B is a multi-  
496 domain protein that is localized to essentially all CpG-rich promoters *via* its CxxC domain  
497 that binds to unmethylated CpG dinucleotides. KDM2B is also a constituent of a non-  
498 canonical (variant) polycomb repressor complex 1 (PRC1) (Farcas et al., 2012; He et al.,  
499 2013; Wu et al., 2013), and KDM2B's leucine-rich repeat (LRR) domain and the F-box  
500 domain are essential for KDM2B to recruit/assemble the PRC1 (Boulard et al., 2015;  
501 Inagaki et al., 2015). KDM2B plays pivotal roles in cell senescence and proliferation, DNA  
502 repair, embryogenesis, oncogenesis, and somatic cell reprogramming (Andricovich et al.,  
503 2016; He et al., 2008; Jiang et al., 2015; Kottakis et al., 2014; Li et al., 2017a; Liang et al.,  
504 2012; Wang et al., 2011b). We found KDM2B relies on its LRR domain but not the F-box  
505 to regulate neuronal differentiation (Figure 6). Leucine-rich repeats are frequently involved  
506 in mediating protein–protein interactions, but most of human LRR-containing proteins  
507 remain functionally uncharacterized (Ng and Xavier, 2011). In addition, the E3 ligase  
508 activity of RING1B, PRC1's core component, seems dispensable for cortical neurogenesis  
509 (Figure 6 - figure supplement 1C-1E), which is in line with findings showing the enzymatic  
510 capabilities of RING1B is dispensable for early mouse development (Illingworth et al.,  
511 2015). Consistently, inactivation of *Kdm2b* in mice doesn't result in reduction of  
512 H2AK119Ub1, a histone modification mediated by PRC1 complex (Figure 6 - figure  
513 supplement 1F-1G), suggesting KDM2B relies on signals other than PRC1 to promote  
514 neuronal differentiation. The deletion or mutation of JmjC, CxxC, PHD domains  
515 individually could rescue hampered neuronal differentiation caused by *Kdm2b* loss (Figure  
516 6A-6D), but these domains may still exert scaffold or adaptor roles.

517

518 It will be also worthy of exploring how the transient expressions of *Kdm2b* and *LncKdm2b*



519 are initiated and maintained in cortical IPCs and freshly-born PNs. A report showed  
520 KDM2B's expression in primary MEFs and cancer cells is induced by FGF-2 via CREB  
521 phosphorylation and activation, downstream of DYRK1A kinase (Kottakis et al., 2011).  
522 Since both FGF-2 and DYRK1A have essential roles in cortical development, it remains  
523 to be studied if they regulate *KDM2B*'s expression in this context (Arron et al., 2006;  
524 Benavides-Piccione et al., 2005; Fotaki et al., 2002; Ghosh and Greenberg, 1995; Vescovi  
525 et al., 1993). Nonetheless, we discovered *Kdm2b*'s novel function in promoting neuronal  
526 differentiation, which is PRC1 independent. Moreover, *Kdm2b*'s expression is maintained  
527 by its divergent lncRNA *LncKdm2b*, which mediates a permissive chromatin environment  
528 around *Kdm2b*'s promoter. Since normal cortical development is key to neurological  
529 functions such as cognition, KDM2B may have implications in neuropsychiatric disorders.  
530 In line with this, *KDM2B* is among the most frequently deleted genes in the 12q24.31  
531 microdeletion syndrome, which is characterized by principal clinical features including  
532 autism, intellectual disability, epilepsy, and craniofacial anomalies (Labonne et al., 2016).  
533 Intriguingly, human *LncKDM2B* is also transcribed divergently from the promoter of  
534 *KDM2B* with high sequence homology with *LncKdm2b* (Ye et al., 2018). It remains to be  
535 investigated if *LncKDM2B*'s *cis*-regulating roles and KDM2B's function in promoting  
536 neuronal differentiation are conserved in human.

537

## 538 **Materials and methods**

### 539 **Key resources table**

| REAGENT or RESOURCE                | SOURCE   | IDENTIFIER                   |
|------------------------------------|----------|------------------------------|
| <b>Antibodies</b>                  |          |                              |
| Mouse monoclonal to $\beta$ -Actin | Chemicon | MAB1501; RRID:<br>AB_2223041 |

|                                           |                              |                                |
|-------------------------------------------|------------------------------|--------------------------------|
| Mouse monoclonal to TUJ1                  | Sigma                        | T8660; RRID: AB_477590         |
| Rat monoclonal to BrdU                    | Abcam                        | ab6326; RRID: AB_305426        |
| Mouse monoclonal to BrdU                  | Santa Cruz                   | sc-32323, RRID:<br>AB_626766   |
| Rabbit monoclonal to Cleaved<br>Caspase-3 | Cell Signaling               | 9664; RRID: AB_2070042         |
| Rat monoclonal to CTIP2                   | Abcam                        | ab18465; RRID:<br>AB_2064130   |
| Rabbit polyclonal to GFP                  | Invitrogen                   | A11122; RRID: AB_221569        |
| Rabbit polyclonal to KDM2B                | Millipore                    | 17-10264; RRID:<br>AB_11205420 |
| Rabbit polyclonal to KDM2B                | Millipore                    | 09-864; RRID:<br>AB_10806072   |
| Rabbit polyclonal to KDM2B                | Labaratory of<br>JieKai Chen | N/A                            |
| Rabbit polyclonal to PAX6                 | Chemicon                     | AB2237; RRID:<br>AB_1587367    |
| Rabbit polyclonal to TBR2                 | Abcam                        | ab23345; RRID:<br>AB_778267    |
| Rabbit polyclonal to SOX2                 | Millipore                    | ab5603; RRID:<br>AB_2286686    |
| Mouse monoclonal to FLAG                  | Sigma-Aldrich                | F1804; RRID: AB_262044         |
| Mouse monoclonal to SATB2                 | Abcam                        | ab51502; RRID:<br>AB_882455    |

|                                       |              |                                 |
|---------------------------------------|--------------|---------------------------------|
| Goat polyclonal to UNC5D              | R&D          | AF1429; RRID:<br>AB_2304199     |
| Sheep anti-DIG AP                     | Roche        | 11093274910; RRID:<br>AB_514497 |
| Mouse monoclonal to H3K4me3           | Active Motif | MABI0304; RRID:<br>AB_514497    |
| Mouse monoclonal to H3K27ac           | Millipore    | 17-683; RRID:<br>AB_1977529     |
| Rabbit polyclonal to NEUROD2          | Abcam        | ab104430; RRID:<br>AB_10975628  |
| Rabbit polyclonal to SATB1            | Abclonal     | A5800                           |
| Mouse monoclonal to hnRNPAB           | Santa Cruz   | sc-32323                        |
| Rabbit polyclonal to GAPDH            | Cwbio        | CW0101M; RRID:<br>AB_2665434    |
| Rabbit polyclonal to $\beta$ -TUBULIN | Proteintech  | 10094-1-AP; RRID:<br>AB_2210695 |

---

**Chemicals, Peptides, and Recombinant Proteins**

---

|                   |               |           |
|-------------------|---------------|-----------|
| B27               | Thermo Fisher | 17504044  |
| N2                | Thermo Fisher | 17502048  |
| hEGF              | Thermo Fisher | PHG0311   |
| hFGF2             | Thermo Fisher | PHG0261   |
| Papain            | Worthington   | LS003118  |
| DNase I           | Sigma-Aldrich | DN-25     |
| DMEM-F12 medium   | Thermo Fisher | 12634-010 |
| Protein G agarose |               |           |

|                                |               |             |
|--------------------------------|---------------|-------------|
| Streptavidin Agarose           | Thermo Fisher | S951        |
| 5-Bromouridine 5'-triphosphate | Sigma-Aldrich | B7166       |
| Mung Bean Nuclease             | Takara Bio    | 2420A       |
| Micrococcal Nuclease           | NEB           | M0247S      |
| Vanadyl Ribonucleoside Complex | Sangon        | B644221     |
|                                | Biotech       |             |
| Protease inhibitor             | Biotool       | B14001      |
| PMSF                           | Sigma-Aldrich | P7626       |
| Proteinase K                   | Sigma         | P4032       |
| NBT/BCIP                       | Roche         | 11681451001 |
| DIG-NTP                        | Roche         | 11277073910 |
| Biotin RNA labeling mix        | Roche         | 11685597912 |
| CDP-star                       | Roche         | 11685627001 |
| paraformaldehyde               | Sigma-Aldrich | P6148       |
| FastGreen                      | Sigma-Aldrich | F7252       |
| Lipofectamine 3000             | Invitrogen    | L3000-150   |
| Trizol                         | Thermo Fisher | 15596026    |

---

#### **Bacterial and Virus Strains**

|                                   |          |            |
|-----------------------------------|----------|------------|
| <i>E. coli</i> DH5 $\alpha$       | TransGen | CD201-01   |
| <i>E. coli</i> Stbl3              | TransGen | CD521-01   |
| Mus musculus BAC clone            | BACPAC   | RP23-214I6 |
| Lentivirus vector, pLKO.1-zsGreen |          |            |

---

#### **Critical Commercial Assays**

|                               |       |           |
|-------------------------------|-------|-----------|
| Mouse Neural Stem Cell        | LONZA | VAPG-1004 |
| Nucleofector <sup>®</sup> Kit |       |           |

HiScribe™ T7 High Yield RNA      NEB      E2040S  
 Synthesis Kit

---

**Experimental Models: Cell Lines**

---

|                                                                          |                                                       |           |
|--------------------------------------------------------------------------|-------------------------------------------------------|-----------|
| Mouse Neuro-2a cell line                                                 | The Cell Bank<br>of Chinese<br>Academy of<br>Sciences | TCM29     |
| Mouse NE-4C cell line                                                    | The Cell Bank<br>of Chinese<br>Academy of<br>Sciences | SCSP-1501 |
| Human HEK293T cell line                                                  | A gift from Dr.<br>Hongbing Shu                       |           |
| <i>LncKdm2b</i> polyA Knock-in mouse<br>ES cells                         | This paper                                            | N/A       |
| <i>LncKdm2b</i> polyA Knock-in and<br><i>Kdm2b</i> indels Mouse ES Cells | This paper                                            | N/A       |

---

**Experimental Models: Organisms/Strains**

---

|                |                                  |     |
|----------------|----------------------------------|-----|
| Mouse: CD-1    | Hunan<br>Laboratory<br>Animal Co | SJA |
| Mouse: C57BL/6 | Hunan<br>Laboratory<br>Animal Co | SJA |

|                                          |                        |     |
|------------------------------------------|------------------------|-----|
| Mouse: <i>Ai14</i> reporter              | (Madisen et al., 2010) |     |
| Mouse: <i>Kdm2b</i> <sup>CreERT2/+</sup> | This paper             | N/A |
| Mouse: <i>Kdm2b</i> null                 | This paper             | N/A |

---

**Recombinant DNA**

---

|              |         |       |
|--------------|---------|-------|
| pGEM-Teasy   | Promega | A1360 |
| pCAGGS       |         |       |
| pCAG-mir30   |         |       |
| pMD2.G       | Addgene | 12259 |
| psPAX2       | Addgene | 12260 |
| pGL3-basic   | Promega | E1751 |
| phRL-TK      | Promega | E6921 |
| pCALNL-DsRed | Addgene | 13769 |

---

**Software and Algorithms**

---

|                                  |                      |                                                                                                           |
|----------------------------------|----------------------|-----------------------------------------------------------------------------------------------------------|
| DAVID functional annotation tool | (Huang et al., 2008) | <a href="https://david.ncifcrf.gov/">https://david.ncifcrf.gov/</a>                                       |
| UCSC Genome Browser              | (Kent et al., 2002)  | <a href="http://genome.ucsc.edu/">http://genome.ucsc.edu/</a>                                             |
| CPAT                             | (Wang et al., 2013)  | <a href="http://lilab.research.bcm.edu/cpat/index.php/">http://lilab.research.bcm.edu/cpat/index.php/</a> |
| PhyloCSF                         | (Lin et al., 2011)   | <a href="http://compbio.mit.edu/PhylCSF/">http://compbio.mit.edu/PhylCSF/</a>                             |
| RNAfold web server               |                      | <a href="http://rna.tbi.univie.ac.at/">http://rna.tbi.univie.ac.at/</a>                                   |
| Prism                            | GraphPad             | Ver 6                                                                                                     |

---

540

541 **Contact for reagent and resource sharing**

542 Further information and requests for resources and reagents should be directed to and  
543 will be fulfilled by the Lead Contact, Yan Zhou ([yan.zhou@whu.edu.cn](mailto:yan.zhou@whu.edu.cn)).

544

## 545 **Experimental model and subject details**

547

### 548 **Mouse**

549 All animal procedures were approved by the Animal Care and Ethical Committee of  
550 College of Life Sciences at Wuhan University. CD-1 and C57BL/6 mice were purchased  
551 from HNSJA. Mice were housed in a certified specific-pathogen-free (SPF) facility. The  
552 noon of the day on which the vaginal plug is found is counted as embryonic (E) day 0.5.

553

### 554 **Generation of *Kdm2b*<sup>CreERT2/+</sup> Knock-In Reporter Mice**

555 *Kdm2b*<sup>CreERT2/+</sup> knock-in reporter mice were generated by Biocytogen (Beijing, China). A  
556 sequence encoding the self-cleaving T2A peptide was fused in frame with exon 3 of the  
557 *Kdm2b* followed by the CreERT2-IRES-EGFP cassette. To generate the *Kdm2b*  
558 targeting vector, a 1 kb 5' homology (LR), a 1 kb 3' homology arm (RR), F2a-iCreERT2,  
559 or IRES-EGFP were amplified by PCR. Fragment LR and F2a-iCreERT2 were  
560 overlapped to form fragment LR-F2a-iCreERT2 (Sal I to BamH I). Fragment IRES-EGFP  
561 and RR were overlapped to form IRES-EGFP-RR (BamH I to Sac I). Then fragment LR-  
562 F2a-iCreERT2 and IRES-EGFP-RR were cloned into the TV-2G vector. For cloning the  
563 sgRNA-expression cassette, annealed DNA was ligated with pT7-sgRNA. SgRNAs were  
564 transcribed *in vitro* by T7 RNA Synthesis Kit (NEB). Targeting vector, Cas9 vector, and  
565 sgRNAs were microinjected into mouse zygotes. After injection, zygotes were  
566 immediately transferred into pseudo-pregnant female mice to generate founders, which  
567 were genotyped by PCR and sequencing. Positively founders were crossed with  
568 C57BL/6 wild-type mice to generate F1 mice. F1 mice were screened by PCR, and

569 positive mice were confirmed by Southern blot using the iCre internal probe and 3'  
570 external probe. The genders of embryos were not determined for analyses conducted in  
571 this study. See Supplementary file 1 - Table 4 for sgRNA sequences and genotyping  
572 primers.

573

#### 574 **Generation of *Kdm2b* Null Mice**

575 *Kdm2b* null mice were generated by Dr. Hongliang Li (Wuhan University, China). For  
576 cloning the sgRNA-expression cassette, sgRNAs targeting the exon encoding the CxxC  
577 domain were designed and synthesized, and annealed DNA was ligated to pT7-sgRNA.  
578 SgRNAs were transcribed *in vitro* by T7 RNA Synthesis Kit (NEB). Cas9 vector and  
579 sgRNAs were microinjected into the mouse zygote. After injection, the zygotes were  
580 immediately transferred into pseudo-pregnant female mice to generate founders, which  
581 were genotyped by PCR and sequencing. Positively founders were bred and crossed  
582 with C57BL/6 mice to generate F1 mice, which were screened by PCR and sequencing.  
583 See Supplementary file 1 - Table 4 for sgRNA sequences and genotyping primers.

584

#### 585 **Genetic Lineage-tracing**

586 All animals used for analyses in Figure 1 and Figure 1 - figure supplement 1 were  
587 heterozygous for the Cre allele (*Kdm2b*<sup>CreERT2/+</sup>). In Figure 1 - figure supplement 2, data  
588 were generated by crossing *Kdm2b*<sup>CreERT2/+</sup> with *Ai14*<sup>fl/fl</sup> animals, both with congenic  
589 C57BL/6J backgrounds. Tamoxifen was dissolved in corn oil as previously described  
590 (Guo et al., 2013). To perform lineage-tracing analyses using the *Kdm2b*<sup>CreERT2/+</sup>; *Ai14*  
591 mice, tamoxifen was injected into pregnant dams at indicated stages with a  
592 concentration of 100 mg/kg body weight.

593



594 **Generation of *LncKdm2b* polyA Knock-In (mESCs<sup>*LncKdm2b-pAS1+*</sup>) and *Kdm2b* indels**

595 **Mouse ES Cells**

596 *LncKdm2b* polyA knock-in mouse ES cells (mESCs<sup>*LncKdm2b-pAS1+*</sup>) were generated by  
597 Biocytogen (Beijing, China). The targeting vector contains two homology arms (1 kb  
598 each), the 3 × SV40 polyA signal sequence and a BGH polyA signal (a total of 4 × polyA  
599 signals), followed by an expression cassette of ΔTK and Neo flanked by two loxP sites.  
600 The targeting vector was electroporated into mouse ES cells with Cas9-expressing  
601 vectors and sgRNAs that target the genomic site 1.8 kb downstream of the *LncKdm2b*  
602 TSS. Out of 200 neomycin resistant clones, one heterozygous knock-in ESC clone was  
603 obtained through PCR and sequencing analyses. To generate mESCs<sup>*LncKdm2b-pAS1+*</sup> with  
604 *Kdm2b* indels, sgRNAs that target the second exon of *Kdm2b* were electroporated into  
605 mESCs<sup>*LncKdm2b-pAS1+*</sup>. mESC clones with distinguishable indel mutations between two  
606 alleles were selected by PCR and sequencing analyses. See Supplementary file 1 -  
607 Table 4 for sgRNA sequences, genotyping and qPCR primers.

608

609 **Cell Lines**

610 HEK293T cells were gifts from Dr. Hongbing Shu (Wuhan University). Neuro-2a cells  
611 and NE-4C cells were purchased from the Cell Bank of Chinese Academy of Sciences  
612 Cells were maintained in indicated culture media (DMEM or MEM) containing 10% fetal  
613 bovine serum (Life Technologies or Hyclone) and used within ten passages since arrival.

614

615 **Plasmids Construction**

616 For constructing eukaryotic expression vectors, full-length mouse *Kdm2b* was PCR  
617 amplified from the pMXs-*Kdm2b*-Flag vector, a gift from Dr. Baoming Qin (Guangzhou  
618 Institutes of Biomedicine and Health, Chinese Academy of Sciences), then subcloned  
619 into the pCAGGS vector using EcoR I / Mlu I. KDM2B-mJmjC, KDM2B-ΔCxxC, KDM2B-

620 mPHD, KDM2B- $\Delta$ Fbox, KDM2B- $\Delta$ LRR, and shRNA-resistant mutants were constructed  
621 using site-directed mutagenesis. Full-length *LncKdm2b* was PCR amplified from the  
622 cDNA of the E16.5 C57BL/6 embryonic cortex, and the PCR product was cloned into  
623 pCAGGS using EcoR I / Not I. The longest ORF of *LncKdm2b* was fused in frame with  
624 sequence encoding C-terminal 3  $\times$  Flag tag and cloned into the eukaryotic expression  
625 vector pcDNA3.1 using EcoR I /Hhe I. The CDS sequence of mouse hnRNPAB was  
626 PCR amplified from the cDNA of the E16.5 C57BL/6 embryonic cortex, was cloned into  
627 the eukaryotic expression vector pFLAG-N3 (a gift from Dr. ZhiYin Song, Wuhan  
628 University) using Xho I / EcoR I in frame with sequence encoding C-terminal 3  $\times$  Flag  
629 tag. pCALNL was a gift from Dr. Xiaoqun Wang (Institute of Biophysics, Chinese  
630 Academy of Sciences). Luciferase reporter vector was constructed according to the  
631 previous study (Li et al., 2017b). Briefly, the T5 Forward, T5 Reverse, T5-mini Forward,  
632 or T5-mini Reverse were PCR amplified from the genomic DNA of C57BL/6 mice and  
633 cloned into pGL3-Basic Vector using Mlu I and Xho I. *Kdm2b* promoter and *Kdm2b*  
634 promoter with the CARG box deletion were cloned into pGL3-Basic Vector using Sac I  
635 and Xho I. For constructing RNA tethering vectors, the LacZ sequence from pcDNA3-  
636 BoxB-LacZ was removed by Xho I and Xba I digestion, and *LncKdm2b* was amplified  
637 from the pCAGGS-*LncKdm2b* Vector and cloned into the same sites with Xho I and Xba  
638 I. 5  $\times$  UAS-TK-Luc, pcDNA3-Gal4- $\lambda$ N, and pcDNA3-BoxB-LacZ were gifts from Dr. Xiang  
639 Lv (CAMS & PUMC). For constructing KUS-d2EGFP or KUSR-d2EGFP, EGFP and  
640 ODC (422-461 aa) were amplified by PCR, overlapped to form fragment d2EGFP (EcoR  
641 I to Bgl II) (Corish and Tyler-Smith, 1999). Then d2EGFP was cloned into the pCAGGS  
642 vector using EcoR I and Bgl II. pCAGGS-d2EGFP was digested by Apa I, followed by  
643 Mung Bean Nuclease (Takara Bio) modification and removal of the CAG promoter by  
644 Sal I digestion. KUS or KUSR were PCR amplified from the genomic DNA of C57BL/6  
645 mice and cloned into the same site with Xho I. For construction short-hairpin RNA

646 (shRNA) vectors, the oligonucleotides for shRNA targeting *Kdm2b* or *LncKdm2b* were  
647 cloned into pLKO.1-zsGreen or pCAG-mir30 vectors using Age I / EcoR I or Xho I /  
648 EcoR I. A scramble shRNA plasmid was used as a negative control. Primer sequences  
649 for all constructs were listed in Supplementary file 1 - Table 4.

650

### 651 **Protein Expression and Purification for hnRNPAB**

652 Plasmids expressing Flag-tagged hnRNPAB were transfected into HEK293T cells. Cells  
653 were harvested after 2 days to achieve optimal expression.  $2 \times 10^8$  HEK293T cells were  
654 resuspended in lysis buffer [20 mM Tris pH 8.0, 100 mM NaCl, 1 mM PMSF, protease  
655 inhibitor cocktail (Biotool)] followed by sonication with 30% power output (3 minutes, 0.5  
656 seconds on, 0.5 seconds off) on ice. After centrifugation at 12,000 rpm for 10 minutes at  
657 4°C, supernatants were incubated with 50  $\mu$ L anti-Flag agarose beads (Biotool) for 2  
658 hours at 4°C. The agarose beads were washed 4  $\times$  5 minutes with TBS buffer, and  
659 bound protein was eluted with 200 ng/ $\mu$ L 3  $\times$  FLAG peptide (Sigma-Aldrich, F4799) in  
660 TBS buffer at 4°C for 30 minutes. the eluted sample was ultrafiltrated and concentrated  
661 with 0.5 mL Amicon Ultra-centrifugal filters (Millipore, UFC501024). The concentration of  
662 purified protein was determined using Bicinchoninic Acid Protein Assay Kit (Beyotime  
663 Biotechnology) and by Western blot.

664

### 665 **Lentivirus Production and Cell Infection**

666 To obtain lentiviral particles, HEK293T cells ( $5 \times 10^6$  cells in a 10-cm dish) were  
667 transiently transfected with 12  $\mu$ g pLKO.1 shRNA constructs, 6  $\mu$ g of psPAX2 and 6  $\mu$ g  
668 pMD2.G. The supernatant containing lentivirus particles was harvested at 48 hours after  
669 transfection, and filtered through Millex-GP Filter Unit (0.22  $\mu$ m pore size, Millipore). Viral  
670 particles were then stored at -80°C ultra-cold freezer until use. Cortical NPCs infected by

671 lentivirus at a low viral titer. Knockdown efficiency was evaluated by RT-qPCR analysis  
672 three days post-infection.

673

#### 674 **Antisense Oligonucleotide (ASO) Treatment**

675 Phosphorothioate-modified antisense oligodeoxynucleotides (ASOs) were synthesized  
676 at BioSune (Shanghai, China), and transduced into Neuro-2a cells using Lipofectamine®  
677 3000 (Thermo Fisher Scientific) according to the manufacturer's protocol at 100 nM. For  
678 transfecting primary NPCs, ASOs were introduced into tertiary cortical NPCs derived  
679 from E14.5 CD-1 mouse cortex by nucleofection (Lonza) according to the manufacturer's  
680 protocol at 1  $\mu$ M for  $1 \times 10^6$  cells. Optimal programs and solutions of the Lonza Cell Line  
681 Nucleofector Kit for the ASO delivery were tested. Total RNAs were collected for RT-  
682 qPCR analysis two days post-transfection. Total protein was collected for  
683 immunoblotting analysis four days post-transfection. See Supplementary file 1 - Table 4  
684 for ASO sequences.

685

#### 686 **Knockout of *Lnckdm2b* and T5 by CRISPR/Cas9**

687 CRISPR/Cas9-mediated genomic knockout was performed essentially as described  
688 previously (Cheng et al., 2016). Briefly, annealed oligonucleotides for sgRNAs targeting  
689 T5 or *Lnckdm2b*'s exon2 were cloned into a PiggyBac-based vector (pPB-sgRNA-Cas9).  
690 pPB-sgRNA-Cas9 and the transposase-expressing vector were mixed in a 1:1 ratio and  
691 co-transfected into NE-4C cells using lipofectamine 3000 or electroporated into E13.5  
692 CD-1 mouse embryonic cortices. NE-4C cells that stably express Cas9 and sgRNAs  
693 through transposon-mediated random insertion were selected by flow cytometry and  
694 maintained as mono-clones for two weeks. Individual NE-4C clones (23-26 clones) were  
695 picked, expanded and analyzed by PCR genotyping. E15.5 cortical cells were isolated  
696 from embryonic cortices two days after electroporation and maintained in neurosphere

697 culture medium for a week. Cortical cells that stably express Cas9 and sgRNAs were  
698 selected by flow cytometry and an aliquot was subjected to genomic DNA or RNA  
699 isolation followed by PCR genotyping and qPCR. See Supplementary file 1 - Table 4 for  
700 sgRNA sequences, genotyping and qPCR primers.

701

## 702 **Northern Blot**

703 Dorsal forebrain tissues were resected from E14.5 and E16.5 mouse embryos under  
704 dissecting microscopes. Total RNAs were extracted twice using Trizol (Thermo Fisher).  
705 The polyA<sup>+</sup> RNA fractions were enriched using the NEBNext Poly(A) mRNA Magnetic  
706 Isolation Module (NEB). About 1 µg of polyA<sup>+</sup> RNA from each sample was subjected to  
707 formaldehyde denaturing agarose electrophoresis followed by transferring to positively  
708 charged nylon membrane with 20× SSC buffer (3.0 M NaCl and 0.3 M sodium citrate, pH  
709 7.0). Membrane was UV-cross-linked and incubated with DIG-labeled RNA probes  
710 (*LncKdm2b*, 217-1307 nt) generated by *in vitro* transcription with the DIG-RNA Labeling  
711 Mix (Roche). Hybridization was done overnight at 65°C in DIG Easy Hyb Hybridization  
712 solution (Roche). Membranes were stringently washed three times in wash buffer 1 (0.1×  
713 SSC and 0.1% SDS) for 15 minutes at 65°C, then rinsed in wash buffer 2 [0.1 M maleic  
714 acid, 0.15 M NaCl, 0.3% Tween 20 (pH 7.5)] and incubated in blocking reagent (Roche)  
715 for 1 hour at room temperature. Subsequently, membranes were incubated with a  
716 60,000-fold dilution of anti-DIG-AP Fab fragment (Roche) in blocking reagent for 30  
717 minutes at room temperature, washed three times in wash buffer 2 for 10 minutes at  
718 room temperature, and immersed in detection buffer [0.1 M Tris·HCl, 0.1 M NaCl (pH  
719 9.5)] for 5 min. Anti-DIG-AP was detected using CDP-star chemiluminescent substrate  
720 for alkaline phosphatase (Roche) and X-ray film exposure. See Supplementary file 1 -  
721 Table 4 for primers used in generating Northern Blot probes.

722

723 ***In situ* Hybridization (ISH)**

724 To make ISH probes, the 5'-overhang of forward primer was modified with a T7 promoter  
725 (See Supplementary file 1 - Table 4 for the primers used in ISH probes). Digoxigenin  
726 labeled riboprobes were transcribed using the DIG-RNA Labeling Mix (Roche). *In situ*  
727 Hybridization was performed as described (Li et al., 2017b). In brief, all solutions were  
728 prepared properly to avoid RNase contamination. Digoxigenin-labeled *LncKdm2b* and  
729 *Kdm2b* riboprobes were transcribed *in vitro* using NTP mix containing digoxigenin-  
730 labeled UTP (Roche). E12.5 CD-1 mouse embryos and E16.5 mouse brains were fixed  
731 in chilled 4% paraformaldehyde (Sigma) in 1 × PBS overnight followed by treatment of  
732 20% sucrose in 1 × PBS overnight. Tissues were embedded in OCT, and 14 µm  
733 sections were cut onto slides using a Leica CM1950 cryostat. Sections were  
734 permeabilized with 2 µg/mL proteinase K (Sigma) for 10 minutes followed by acetylation  
735 in 0.1 M TEA (triethanolamine) solutions (10 mL 1 M TEA solution and 250 µL acetic  
736 anhydride in 90 mL DEPC treated ddH<sub>2</sub>O) for 10 minutes. Slides were blocked in  
737 hybridization buffer (50% deionized formamide; 5 × SSC, 5 × Denharts; 250 µg/mL yeast  
738 RNA; and 500 µg/mL herring sperm DNA) at room temperature (R/T) for 3 hours  
739 followed by incubating with 0.1-0.2 ng/µL digoxigenin-labeled riboprobe in hybridization  
740 buffer overnight at 60°C in humidified boxes. Slides were washed with 65°C 0.1 × SSC  
741 for three times (20 minutes each) followed by blocking with 10% heat-inactivated sheep  
742 serum in buffer B1 (0.1 M Tris-HCl, pH 7.4; 150 mM NaCl) at room temperature for 1  
743 hour. Sections were incubated with an alkaline phosphatase-conjugated anti-digoxigenin  
744 antibody (1:5000, Roche) overnight at 4°C. After washing three times in buffer B1,  
745 sections were equilibrated twice in buffer B3 (0.1 M Tris-HCl; 0.1 M NaCl; 50 mM MgCl<sub>2</sub>;  
746 0.1% Tween-20, pH 9.5) for 10 minutes. Colorization was performed using NBT/BCIP  
747 (Roche) containing B3 solutions at R/T overnight in the dark. Slides were dehydrated,  
748 cleared and mounted using gradient ethanol, xylene, and neutral balsam sequentially.

749 Images were collected using a Nikon 80i microscope equipped with Nikon DS-F11C-U3  
750 camera system.

751

## 752 **Immunofluorescence (IF) and Immunoblotting**

753 IF and immunoblotting were performed as described (Li et al., 2017b). For  
754 immunofluorescent staining, 4% paraformaldehyde (PFA) fixed 14  $\mu$ m sections or cells  
755 were permeabilized and blocked with blocking buffer (3% heat-inactivated normal goat  
756 serum, 0.1% bovine serum albumin and 0.1% Triton-X 100 in 10 mM Tris-HCl, pH 7.4;  
757 100 mM NaCl) for one hour at R/T. Sections were then incubated with primary  
758 antibodies diluted in blocking buffer overnight at 4°C or R/T. The next day, slides were  
759 washed three times for 10 minutes with 1  $\times$  PBS and incubated with second antibodies  
760 in blocking buffer at R/T for an hour. Slides were mounted with anti-fade solution with  
761 DAPI after PBS wash. For triple IF labeling of EGFP/PAX6/BrdU, sections were stained  
762 for EGFP/PAX6 antibodies first, then treated with 20  $\mu$ g/mL proteinase K (Sigma) for 5  
763 minutes followed by 2 mol/L HCl for 30 minutes before BrdU staining. All  
764 immunofluorescence comparing expression levels were acquired at equal exposure  
765 times. Immunoblotting assays were carried out according to standard procedures.

766

## 767 **RNA-seq Transcriptome Analysis**

768 Dorsal forebrain (cortex) tissues were resected from E10.5 or E12.5 mouse embryos  
769 under dissecting microscopes. Total RNAs were extracted twice using Trizol (Thermo  
770 Fisher) and were treated with DNase I (NEB Biolabs). The integrity of RNAs was  
771 analyzed using Agilent Bioanalyzer 2100. Removal of ribosomal RNAs (rRNAs) and  
772 construction of libraries for standard strand-specific RNA-seq were performed using  
773 Illumina HiSeq 2000 in BGI Tech. Quality control reads alignment, and gene-expression  
774 analysis were also carried out in BGI Tech. Some low-quality RNA reads were present in



775 original data. Thus, four kinds of reads were removed before mapping to the mouse  
776 genome. 1) Adaptor sequences; 2) Poor quality reads that Q5 or less mass value bases  
777 account for more than 50% of the entire reads; 3) Reads that have a proportion of “N”  
778 greater than 10%. 4) Reads that align with mouse rRNA. Next, the resulting clean reads  
779 were mapped to mouse genome (NCBI37/mm9) by TopHat (Trapnell et al., 2009) and  
780 an *ab initio* transcriptome reconstruction approach was performed by Cufflinks (Trapnell  
781 et al., 2012). To explore the expression patterns of coding and non-coding gene across  
782 embryonic cortical development, we used the Galaxy platform (Goecks et al., 2010) to  
783 integrate RNA-seq data from four other studies (mESCs and NPCs: GSE20851; mouse  
784 E14.5 VZ, IZ, and CP: GSE30765; E17.5 cortex: GSE39866; adult mouse cortex:  
785 GSE39866, GSE45282 ) (Ayoub et al., 2011; Dillman et al., 2013; Guttman et al., 2010;  
786 Ramos et al., 2013). Finally, we used Cuffnorm to calculate FPKM (Fragments Per  
787 Kilobase of exon per Million fragments mapped). GO analysis was performed using the  
788 DAVID Functional Annotation Bioinformatics Microarray Analysis tool (Huang et al.,  
789 2008). The RNA-seq data of E10.5 or E12.5 mouse cortice were deposited in the Gene  
790 Expression Omnibus with accession no. GSE55600.

791

## 792 **RNA Fractionation**

793 RNA fractionation was performed as previously described (Cabianca et al., 2012). In  
794 brief, neural progenitor cells from E14.5 mouse cortices were detached by treating with 1  
795 × Trypsin, counted and centrifuged at 168 g for 5 minutes. The pellet was lysed with 175  
796 µL/10<sup>6</sup> cells of cold RLN1 solution [50 mM Tris-HCl, pH 8.0; 140 mM NaCl; 1.5 mM  
797 MgCl<sub>2</sub>; 0.5% NP-40; 2 mM Vanadyl Ribonucleoside Complex (Sangon Biotech)] for 5  
798 minutes. The suspension was centrifuged at 4°C and 300 g for 2 minutes. The  
799 supernatant, corresponding to the cytoplasmic fraction, was transferred into a new tube  
800 and stored on ice. The pellet containing nuclei was corresponding to nuclear fractions.



801 Total RNA was extracted from the cytoplasmic and nuclear fractions using TRIzol  
802 solution. The samples were treated with DNase I, washed with 75% ethanol and then  
803 resolved in 30 µL RNase-free water. 1 µg of RNA was used for the first-strand synthesis  
804 with the PrimerScript™ Reverse Transcriptase (Takara Bio) using oligo-dT and random  
805 primers. cDNA was used for qPCR with iTaq™ Universal SYBR® Green Supermix (Bio-  
806 rad) and analyzed by a CFX Connect™ Real-Time PCR Detection System (Bio-rad). See  
807 Supplementary file 1 - Table 4 for qPCR primers.

808

### 809 **Fluorescent RNA *in situ* Hybridization (FISH) and Immunofluorescence**

#### 810 **Microscopy**

811 FISH probes were designed using the Stellaris Probe Designer (Biosearch  
812 Technologies) (See Supplementary file 1 - Table 4 for primers used in FISH probes). A  
813 total of 38 probes with 20 nucleotides in length were used (Tsingke Biotech). Probes  
814 were biotinylated using terminal transferase (NEB, M0315S) with Bio-N6-ddATP (ENZO,  
815 ENZ-42809) as substrates. To detect *LncKdm2b* RNA, adherently cultured primary  
816 NPCs derived from E13.5 mouse cortex were rinsed in PBS and then fixed with 3.7%  
817 formaldehyde in PBS at room temperature for 10 minutes. Cells were permeabilized with  
818 70% ethanol at 4°C overnight. Cells were treated with RNase A (100 µg/mL) or with PBS  
819 (in the control group) at 37°C for 1 hour. After washing in Wash Buffer A (Biosearch  
820 Technologies, SMF-WA1-60) for 5 minutes, cells were incubated with DNA probes in  
821 hybridization buffer (Biosearch Technologies, SMF-HB1-10) at 37°C overnight. After  
822 hybridization, cells were incubated with Alexa Fluor 555 conjugated streptavidin (1:1500  
823 diluted in 1% BSA in PBS) at RT for 1 hour. Cells were washed twice with Wash Buffer A

824 at 37°C for 30 minutes followed by nuclear counterstaining with DAPI. For colocalization  
825 studies, cells were co-stained with mouse anti-hnRNPAB (Santa Cruz Biotechnology).

826

### 827 **Luciferase Reporter Assays**

828 To perform luciferase assays, Neuro-2a and HEK293T cells at ~60% confluency in each  
829 well of 24-well plates were transfected with 500 ng of pGL3-T5 Forward, pGL3-T5  
830 Reverse, pGL3-T5-mini Forward, or pGL3-T5-mini Reverse plus 5 ng of pTK-Ren  
831 vectors using Lipofectamine® 3000 (Thermo Fisher Scientific). For the RNA tethering  
832 experiment, Neuro-2a cells were grown in 24-well plates until 60% confluent and  
833 transfected with 150 ng of 5 × UAS-TK-Luc, pcDNA3-Gal4-λN, and pcDNA3-BoxB-LacZ  
834 or pcDNA3-BoxB-*LncKdm2b*, plus 5 ng of pTK-Ren vectors. For the detection of dose-  
835 dependent repression effect of BoxB-*LncKdm2b* on reporter activity, different doses of  
836 the pcDNA3-BoxB-*LncKdm2b* plasmid at 50 ng, 100 ng or 200 ng were used. As the  
837 amount of BoxB-lncRNA plasmid was increased, an equal amount of BoxB-LacZ was  
838 reduced accordingly. Twenty-four hours after transfection, cells were harvested and  
839 assayed for reporter activity using the Dual-Glo Luciferase Assay System and the  
840 GloMax multidetection system according to manufacturer's instructions (Promega).  
841 Each data point was taken as the average Luc/Ren ratio of triplicate wells. To test the  
842 effects of hnRNPAB knockdown on *Kdm2b*'s promoter activity (CArG Box-containing),  
843 Neuro-2a cells at ~50% confluency in each well of 24-well plates were transfected with  
844 50 nM siRNA targeting hnRNPAB. The second transfections with 500 ng pGL3-p*Kdm2b*  
845 or pGL3-p*Kdm2b* Δ CArG plus 5 ng of pTK-Ren vectors were done twenty-four hours  
846 later. Cells were harvested 24 hours later and assayed for reporter activity.

847

### 848 **Nuclear Run-on (NRO)**

849 Nuclear run-on was performed as previously described (Roberts et al., 2015). About 1-4  
850  $\times 10^6$  Neuro-2a cells were harvested and washed with PBS for one run-on experiment.  
851 Cell pellets were added 1 mL of lysis buffer (10 mM Tris-HCl, pH 7.4; 10 mM NaCl; 3  
852 mM MgCl<sub>2</sub>; 0.5% NP-40) and incubated on ice for 5 minutes. After centrifugation at 300  
853 g for 4 minutes at 4°C, the pellet was washed with lysis buffer without NP-40 and re-  
854 suspended with 40  $\mu$ L nuclear storage buffer (50 mM Tris-HCl, pH 8.3; 40% glycerol; 5  
855 mM MgCl<sub>2</sub>; 0.1 mM EDTA). Equal volume of 2  $\times$  transcription buffer [20 mM Tris-HCl, pH  
856 8.3; 300 mM KCl; 5 mM MgCl<sub>2</sub>; 4 mM DTT; 1 mM each of ATP, GTP and CTP, 0.5 mM  
857 UTP, 100 U RNase Inhibitor (Takara Bio)] was added into nuclei and then supplied with  
858 0.5 mM BrUTP (Sigma). After incubation at 30°C for 30 minutes, RNA was extracted by  
859 TRizol, and digested by 6 U DNase I (Thermo Fisher). About 30  $\mu$ L of protein G agarose  
860 beads were washed with PBST, resuspended in 30  $\mu$ L PBST. 2  $\mu$ g of anti-BrdU  
861 monoclonal antibody (Santa Cruz) was added and incubated on a rotating platform for  
862 10 minutes at room temperature. 150  $\mu$ L of blocking buffer (0.1% PVP and 0.1% BSA in  
863 PBST) was added and incubated for 30 minutes at room temperature. After four times  
864 wash with 300  $\mu$ L PBSTR (80 U RNase Inhibitor per 10 mL of PBST), pellets were  
865 resuspended in 100  $\mu$ L of PBSTR. NRO-RNA samples were treated at 65°C for 5  
866 minutes to denature RNA secondary structures and then incubated with the BrdU  
867 antibody-bound agarose for 60 minutes at room temperature on a rotating platform. After  
868 four times wash with 300  $\mu$ L PBSTR, RNA was extracted by resuspending the pellet in  
869 500  $\mu$ L TRizol. RNAs were reverse-transcribed, and detected by qPCR. RT-qPCR  
870 primers used to detect the pre-mRNAs of *LncKdm2b*, or *Kdm2b* were designed to cover  
871 one exon-intron junction, that is, one primer locates in the intron and the other in the  
872 adjacent exon. See Supplementary file 1 - Table 4 for qPCR primers.

873

874 **Chromatin immunoprecipitation (ChIP)**

875   ChIP experiments were performed essentially as described previously (Wu et al., 2008).  
876   Briefly,  $1 \times 10^7$  Neuro-2a cells per experiment were crosslinked with 1% formaldehyde in  
877   the medium for 10 minutes at room temperature and quenched by adding 0.125 M  
878   glycine for 5 minutes. Cells were then washed twice with ice-cold PBS. Cells were then  
879   harvested in 500  $\mu$ L Digestion buffer (50 mM Tris-HCl, pH 7.9; 5 mM  $\text{CaCl}_2$ ; 100  $\mu$ g/mL  
880   BSA) plus 1400 U Micrococcal Nuclease (NEB) for 20 minutes at 37°C, followed by  
881   adding 5  $\mu$ L 0.5 M EDTA and incubating on ice for 5 minutes. Sonicate samples in EP  
882   tubes on ice with power output 30%, 3 minutes, 0.5 seconds on, 0.5 seconds off. One  
883   percent of the sonicated lysate was used as the input. Sonicated lysates were diluted  
884   into 0.1% SDS using dilution buffer (50 mM Tris-HCl, pH 7.6; 1 mM  $\text{CaCl}_2$ ; 0.2% Triton  
885   X-100; 0.5% SDS) and incubated with 25  $\mu$ L pre-washed protein G agarose beads plus  
886   4  $\mu$ g anti-hnRNPAB (Santa Cruz Biotechnology) or 2  $\mu$ g anti-H3K4me3 (Active Motif) or  
887   anti-H3K27ac (Millipore) antibodies on rocker at 4°C overnight. After wash with Wash  
888   Buffer I (20 mM Tris-HCl, pH 8.0; 150 mM NaCl; 2 mM EDTA; 1% Triton X-100; 0.1%  
889   SDS), 4 times wash with Wash Buffer II (20 mM Tris-HCl, pH 8.0; 500 mM NaCl; 2 mM  
890   EDTA; 1% Triton X-100; 0.1% SDS), 4 times wash with Wash Buffer III (10 mM Tris-HCl,  
891   pH 8.0; 0.25 M LiCl; 1 mM EDTA; 1% deoxycholate; 1% NP-40), and 2 times wash with  
892   TE Buffer, resuspend each pellet in 100  $\mu$ L elution buffer (0.1 M  $\text{NaHCO}_3$ ; 1% SDS) with  
893   1  $\mu$ L 20 mg/mL proteinase K. Cross-linked chromatin was reversed at 65°C overnight.  
894   DNAs were purified using the PCR purification Kit (TianGen). Purified DNA was used for  
895   quantitative PCR analyses and was normalized to input chromatin. See Supplementary  
896   file 1 - Table 4 for qPCR primers.

897

### 898   **Chromosome Conformation Capture (3C)**

899   3C experiments were performed essentially as described previously (Hagege et al.,  
900   2007). Briefly,  $1 \times 10^7$  Neuro-2a cells per experiment were crosslinked with 2%

901 formaldehyde in the medium for 10 minutes at room temperature and quenched by  
902 0.125 M glycine for 5 minutes. Cells were then washed twice with ice-cold PBS. Cells  
903 were lysed in 3C lysis buffer (10 mM Tris-HCl, pH 8.0; 10 mM NaCl; 0.2% NP40; PMSF)  
904 for 1 hour on rocker at 4°C and nuclei were pelleted by centrifugation at 3500 rpm for 10  
905 minutes at 4°C. Pellets were then resuspended in 500 µL 1.2 × restriction enzyme buffer  
906 (NEB) with 0.3% SDS and incubated with rotation at 37°C for 1 hour. Triton X-100 was  
907 added to a final concentration of 2% followed by 1 hour incubation at 37°C with rotation.  
908 400 U of highly concentrated EcoR I (NEB) was added and incubated overnight at 37°C  
909 with rotation. The following day, SDS was added to a final concentration of 1.6%, and  
910 samples were incubated at 65°C for 20 minutes. Samples were then brought up to a final  
911 volume of 7 mL in T4 ligase buffer (66 mM Tris-HCl, pH7.6; 6.6 mM MgCl<sub>2</sub>; 10 mM DTT;  
912 100 µM ATP) with 1% Triton X-100. Samples were rotated at 37°C for 1 hour. Samples  
913 were then chilled on ice for 5 minutes, and 700 U T4 DNA ligase (Takara Bio) was  
914 added, and samples were incubated at 16°C for overnight followed by 30 minutes at  
915 room temperature. Next, 300 µg of proteinase K was added, and crosslinks were  
916 reversed at 65°C overnight. The following day, an additional 300 µg of RNase A was  
917 added and incubated at 37°C for 40 minutes. Finally, genomic DNA was purified by  
918 phenol-chloroform extraction followed by ethanol precipitation. Ligation events were  
919 detected using specific primers. qPCRs were performed on a CFX Connect™ Real-Time  
920 PCR Detection System using iTaq™ Universal SYBR® Green Supermix (Bio-rad).  
921 Specificity and efficiency of all 3C primers were verified by performing digestion and  
922 ligation of the BAC DNA containing the regions of interest. Ligation products were then  
923 serially diluted in sheared genomic DNA, and the efficiency of each PCR reaction was  
924 verified. Amplicons from BAC qPCRs and actual 3C template were run on agarose gel to  
925 verify the production of a single band of the expected size. See Supplementary file 1 -  
926 Table 4 for qPCR primers.

927

928 **Biotin-labeled RNA pull-down**

929 RNA pull-down was performed as described previously (Tsai et al., 2010). To make  
930 biotinylated RNA pull-down probes, the 5'-overhang of forward primer was modified with  
931 a T7 promoter (See Supplementary file 1 - Table 4 for the primers used in RNA pull-  
932 down probes). Biotinylated RNAs were transcribed using the Biotin-RNA Labeling Mix  
933 (Roche) and HiScribe™ T7 High Yield RNA Synthesis Kit (NEB) according to the  
934 manufacturer's protocol. About 3 µg of biotinylated RNA was heated at 90°C for 2  
935 minutes, and then cooled down on ice for 2 minutes in RNA structure buffer (10 mM Tris  
936 pH 7, 0.1 M KCl, 10 mM MgCl<sub>2</sub>), and then shifted to room temperature (RT) for 20  
937 minutes. About 5 x 10<sup>7</sup> primary cells from E14.5 mouse cortices were used for each RNA  
938 pull-down experiment. Cells were resuspended in 2 mL PBS, 2 mL nuclear isolation  
939 buffer (1.28 M sucrose; 40 mM Tris-HCl pH 7.5; 20 mM MgCl<sub>2</sub>; 4% Triton X-100), and 6  
940 mL water for 20 minutes on ice. Nuclei were pelleted by centrifugation at 2,500 g for 15  
941 minutes and resuspended in 1mL RIP buffer [150 mM KCl, 25 mM Tris pH 7.4, 0.5 mM  
942 DTT, 0.5% NP-40, 1 mM PMSF and protease Inhibitor cocktail (Biotool). Resuspended  
943 nuclei were sonicated on ice at 30% power output for 3 minutes (0.5 seconds on, 0.5  
944 seconds off). Nuclear extracts were collected by centrifugation at 12,000 rpm for 10  
945 minutes, and were pre-cleared by 40 µL Streptavidin agarose (Thermo Fisher) for 20  
946 minutes at 4°C with rotation. Pre-cleared lysates were mixed with 3 µg folded  
947 biotinylated RNA and 20 µg yeast RNA at 4°C overnight, followed by adding 60 µL  
948 washed Streptavidin agarose beads to each binding reaction and incubating at RT for  
949 1.5 hours. After 4 × 10 minutes washes by RIP buffer (containing 0.5% sodium  
950 deoxycholate) at 4°C, proteins bound to RNA were eluted in 1 x sample buffer by  
951 heating at 100°C for 10 minutes, and then subjected to SDS-PAGE, and further  
952 visualized by silver staining. Finally, proteins were identified by mass spectrometry.

953

#### 954 **Native RNA-Protein Complex Immunoprecipitation**

955 Native RNA-protein complex immunoprecipitation assays were carried out as described  
956 (Xing et al., 2017) with modifications. Dorsal forebrain (cortex) tissues were resected  
957 from E14.5 mouse embryos and homogenated in 1 mL lysis buffer [50 mM Tris pH 7.4,  
958 150 mM NaCl, 0.5% NP-40, 1 mM PMSF, 2 mM RVC, protease inhibitor cocktail  
959 (Biotool)] followed by sonication with a 30% power output for 3 minutes (0.5 seconds on,  
960 0.5 seconds off) on ice. After centrifuging at 12,000 rpm for 10 minutes at 4°C, the  
961 supernatant was pre-cleared with 30 µL protein G agarose beads. The pre-cleared  
962 lysates were further incubated with 4 µg anti-hnRNPAB antibody (Santa Cruz) for 2  
963 hours at 4°C. Then 50 µL protein G agarose beads (blocked with 1% BSA and 20 µg/ml  
964 yeast tRNA) were added to the mixture and incubated for another 1 hours at 4°C  
965 followed by washing with wash buffer [50 mM Tris pH 7.4, 300 mM NaCl, 0.05% Sodium  
966 Deoxycholate, 0.5% NP-40, 1 mM PMSF, 2 mM RVC, protease inhibitor cocktail  
967 (Biotool)]. RNAs were extracted with Trizol. For qRT-PCR, each RNA sample was  
968 treated with DNase I (Thermo Fisher) and reverse transcription was performed with  
969 PrimerScript™ Reverse Transcriptase (Takara Bio) using random primers followed by  
970 qRT-PCR analysis. See Supplementary file 1 - Table 4 for qPCR primers.

971

#### 972 **Formaldehyde Crosslinking RNA Immunoprecipitation**

973 Formaldehyde crosslinking RNA immunoprecipitation assays were carried out as  
974 described (Xing et al., 2017) with modifications. Dorsal forebrain (cortex) tissues were  
975 resected from E14.5 mouse embryos and fixed 10 mL PBS with 1% formaldehyde 10  
976 minutes at room temperature followed by incubation with 0.25 M glycine at room  
977 temperature for 5 minutes. After pelleting tissues at 1,000 rpm for 5 minutes, the pellet  
978 was homogenized in 1 mL RIPA buffer [50 mM Tris pH 7.4, 150 mM NaCl, 1% NP-40,



979 0.5% Sodium Deoxycholate, 1 mM PMSF, 2 mM RVC, protease inhibitor cocktail  
980 (Biotool)] followed by sonication with a 30% power output for 3 minutes (0.5 seconds on,  
981 0.5 seconds off) on ice. After centrifuging at 12,000 rpm for 10 minutes at 4°C, the  
982 supernatant was pre-cleared with 30 µL protein G agarose beads and 20 µg/ml yeast  
983 tRNA at 4°C for 30 minutes. Then the pre-cleared lysate was incubated with 50 µL  
984 beads that were pre-coated with 4 µg anti-hnRNPAB antibody (Santa Cruz) for 4 hours  
985 at 4°C. The beads were washed 4 × 5 minutes with washing buffer I (50 mM Tris pH 7.4,  
986 1 M NaCl, 1% NP-40, 1% Sodium Deoxycholate), and 4 × 5 minutes with washing buffer  
987 II (50 mM Tris pH 7.4, 1 M NaCl, 1% NP-40, 1% Sodium Deoxycholate, 1 M Urea). The  
988 RNA-protein complex was eluted from beads by adding 140 µL elution buffer (100 mM  
989 Tris pH8.0, 10 mM EDTA, 1% SDS) at room temperature for 5 minutes. To reverse  
990 crosslinking, 4 µL 5 M NaCl and 2 µL 10 mg/ml proteinase K were added into the RNA  
991 samples, and incubated at 42°C for 1 hours followed by incubation at 65°C for one hour.  
992 The RNA was extracted with Trizol. For qRT-PCR, each RNA sample was treated with  
993 DNase I (Thermo Fisher) and then reverse transcription was performed with  
994 PrimerScript™ Reverse Transcriptase (Takara Bio) using random primers followed by  
995 qRT-PCR analysis. See Supplementary file 1 - Table 4 for qPCR primers.

996

### 997 **RNA-protein in *vitro* binding experiments**

998 RNA-protein in *vitro* binding experiments (Dig-RNA pull-down assays) were carried out  
999 as described (Xing et al., 2017) with modifications. To make Dig-labeled *LncKdm2b*  
1000 truncations and loop1 mutations, the 5'-overhang of forward PCR primer was modified  
1001 with a T7 promoter (See Supplementary file 1 - Table 4 for the primers used in RNA pull-  
1002 down probes). Digoxigenin labeled riboprobes were transcribed using the DIG-RNA  
1003 Labeling Mix (Roche). 2 × 10<sup>7</sup> HEK293T cells (Two 10-cm dishes) expressing Flag-  
1004 hnRNPAB were harvested and resuspended in 1 mL lysis buffer [50 mM Tris pH 7.4,



1005 150 mM NaCl, 0.5% NP-40, 0.5 mM PMSF, 2 mM RVC, protease inhibitor cocktail  
1006 (Roche)] followed by sonication on ice. After centrifuging at 12,000 rpm for 10 minutes at  
1007 4°C, the supernatant was incubated with 50 µL anti-Flag agarose beads (Biotool). After  
1008 immunoprecipitation and washing 4 × 5 minutes with TBS buffer, one fifth beads was  
1009 saved for immunoblotting. The rest was equilibrated in binding buffer [50 mM Tris-HCl at  
1010 pH 7.4, 150 mM NaCl, 0.5% NP-40, 1 mM PMSF, 2 mM RVC, protease inhibitor cocktail  
1011 (Biotool)] and incubated with 300 ng Dig-labeled RNA (Dig-labeled RNAs were annealed  
1012 by heating at 65°C for 5 minutes followed with slowly cooling down to room temperature)  
1013 for at 4°C for 4 hours. After washing 4 × 5 minutes with binding buffer, the bound RNA  
1014 was extracted with Trizol and analyzed by Northern blotting.

1015

#### 1016 **Electrophoretic Mobility Shift Assay (EMSA)**

1017 For RNA EMSAs, digoxigenin labeled riboprobes (*LncKdm2b* loop1, 463-625 nt) were  
1018 transcribed using the DIG-RNA Labeling Mix (Roche). EMSA experiments were  
1019 conducted according to the manufacturer's protocol with a Light Shift Chemiluminescent  
1020 RNA EMSA kit (Thermo Scientific). The Dig-labeled RNAs were annealed by heating at  
1021 65°C for 5 minutes followed with slowly cooling down to room temperature. One fmol  
1022 labeled RNAs were used for each EMSA reaction. For detection of dose-dependent  
1023 binding of protein to RNA, different doses of Flag-hnRNPAB (1 µg, 3 µg or 10 µg) were  
1024 used. Unlabeled probe was used for competitive reaction. Binding reactions were  
1025 incubated in binding buffer [10 mM HEPES pH7.5, 20 mM KCl, 1 mM MgCl<sub>2</sub>, 1 mM DTT]  
1026 at room temperature for 25 minutes, then immediately loaded onto a 2% nondenaturing  
1027 agarose 0.5 × TBE (Tris-borate-EDTA) gel. After transfer to a nylon membrane, labeled  
1028 probes were cross-linked by UV, probed with Anti-Digoxigenin-AP antibody, and  
1029 incubated with detection substrates.

1030

1031 **Real-Time Quantitative Reverse Transcription PCR (qRT-PCR)**

1032 Total RNAs (0.5 - 1 µg) were reverse-transcribed at 42°C using PrimerScript™ Reverse  
1033 Transcriptase (Takara Bio). Then iTaq™ Universal SYBR® Green Supermix (Bio-rad)  
1034 was employed to perform quantitative PCR on a CFX Connect™ Real-Time PCR  
1035 Detection System (Bio-rad). Gene expressions were determined using the  $2^{-\Delta\Delta C_t}$  method,  
1036 normalizing to housekeeping genes *Gapdh*. See Supplementary file 1 - Table 4 for  
1037 qPCR primers.

1038

1039 ***In Utero* Electroporation of Developing Cerebral Cortices**

1040 *In utero* microinjection and electroporation were performed essentially at E13.5 as  
1041 described (Li et al., 2017b). In brief, pregnant CD-1 mice were anesthetized by  
1042 intraperitoneal injection of pentobarbital (70 mg/kg). The uteri were exposed through a 2  
1043 cm midline abdominal incision. Embryos were carefully pulled out using ring forceps  
1044 through the incision and placed on sterile and irrigated drape. Intermittently wet uterine  
1045 walls with saline to prevent drying. Supercoiled plasmid DNA (prepared using Endo Free  
1046 plasmid purification kit, Tiangen) mixed with 0.05% Fast Green (Sigma) was injected  
1047 through the uterine wall into the telencephalic vesicle of 3-4 embryos at intervals using  
1048 pulled borosilicate needles (WPI). Electric pulses (36 V, 50 ms duration at 1 s intervals  
1049 for 5 times) were generated using CUY21VIVO-SQ (BEX) and delivered across the  
1050 uterine wall using 5 mm forceps-like electrodes (BEX). The uteri were then carefully put  
1051 back into the abdominal cavity and incisions were sutured. The whole procedure was  
1052 completed within 30 minutes. Mice were warmed on a heating pad until they woke up  
1053 and given analgesia treatment (Ibuprofen) in drinking water until sacrifice.

1054

1055 **Primary Culture of Embryonic Cortical Neural Progenitor Cells (NPCs)**

1056 Primary culture of embryonic cortical NPCs was performed as described (Li et al.,  
1057 2017b). In brief, E11.5 or E12.5 mouse cortices (dorsal forebrain) tissues were washed  
1058 with and minced in filter-sterilized hibernation buffer (30 mM KCl; 5 mM NaOH; 5 mM  
1059  $\text{NaH}_2\text{PO}_4$ ; 5.5 mM glucose; 0.5 mM  $\text{MgCl}_2$ ; 20 mM Na-pyruvate; 200 mM Sorbitol, pH  
1060 7.4) followed by dissociating into single cells using pre-warmed Papain (Worthington  
1061 Biochemical) enzyme solution (1 × DMEM; 1 mM Na-pyruvate; 1 mM L-Glutamine; 1 mM  
1062 N-Acetyl-L-Cysteine; 20 U/mL Papain; 12  $\mu\text{g}/\text{mL}$  DNase I). Dissociated cells were  
1063 cultured using serum-free media consisting of DMEM/F12 media (Life Technologies), N2  
1064 and B27 supplements (1 ×, Life Technologies), 1mM Na-pyruvate, 1 mM N-Acetyl-L-  
1065 Cysteine (NAC), human recombinant FGF2 and EGF (20 ng/mL each; Life  
1066 Technologies). For adherent cortical cultures in Figure 2C and S3A-S3B, cells were  
1067 maintained on poly-L-lysine coated plates with the presence of 20 ng/mL FGF2 for 24  
1068 hours followed by differentiation (FGF2 withdrawal) for 48 hours. For sphere culture in  
1069 Figure 3F, cells were cultured with the presence of EGF and FGF2 for 1 week. For  
1070 clonal culture in Figure 7A-7G, cells were maintained 72 hours with the presence of 20  
1071 ng/mL FGF2 for 72 hours ( $4 \times 10^4$  cells per well in 24-well plates).

1072

### 1073 **Quantification and Statistical Analysis**

1074 Data were presented as the mean  $\pm$  SEM unless otherwise indicated. Statistical analyses  
1075 were conducted using GraphPad Prism (version 6.01). Statistical significance was  
1076 determined using unpaired 2-tailed Student's t test, 1-way ANOVA followed by Tukey  
1077 post hoc test, 2-way ANOVA followed by the Bonferroni post hoc test, and linear  
1078 regression when appropriate.  $p \leq 0.05$  was considered statistically significant. ' \* ' ;  $p$  values  
1079 less than 0.01, or 0.001 was marked as ' \*\* ' , and ' \*\*\* ' respectively.

### 1080 **Author Contributions**

1081 Conceptualization, W.L., W.S. and Y.Z.; Methodology, W.L. and W.S.; Investigation, W.L.,  
1082 W.S., B.Z., K.T., Y.L., L.M., Z.L, X.Z., and Y.L.; Writing – Original Draft, W.L. and Y.Z.;  
1083 Writing – Review & Editing, W.L. and Y.Z.; Funding Acquisition, Y.L. and Y.Z.; Resources,  
1084 X.W.; Supervision, Y.Z.

1085

## 1086 **Acknowledgements**

1087 We thank Drs. Hongliang Li, Haohong Li, Jiekai Chen, Baoming Qin, Xiaoqun Wang, Xiang  
1088 Lv, Min Wu and Haining Du for sharing reagents and technical supports. We thank Drs.  
1089 Weimin Zhong, Qin Shen and Xiaohua Shen, and all members in Zhou lab for critical  
1090 reading of the manuscript. This work was supported by grants from National Natural  
1091 Science Foundation of China (No. 31471361 and No. 31671418), National Key Basic  
1092 Research Program of China (No. 2011CBA01102), National Natural Science Foundation  
1093 of Hubei Province (2018CFA016) and Fundamental Research Funds for the Central  
1094 Universities (2042017kf0205 and 2042017kf0242) to Yan Zhou.

1095

## 1096 **Conflict of interest**

1097 The authors declare no conflict of interest.

1098

## 1099 **References**

1100 Andricovich, J., Kai, Y., Peng, W., Foudi, A., and Tzatsos, A. (2016). Histone demethylase  
1101 KDM2B regulates lineage commitment in normal and malignant hematopoiesis. *The*  
1102 *Journal of clinical investigation* 126, 905-920.  
1103 Aprea, J., Prenninger, S., Dori, M., Ghosh, T., Monasor, L.S., Wessendorf, E., Zocher, S.,  
1104 Massalini, S., Alexopoulou, D., Lesche, M., *et al.* (2013). Transcriptome sequencing during  
1105 mouse brain development identifies long non-coding RNAs functionally involved in  
1106 neurogenic commitment. *EMBO J* 32, 3145-3160.  
1107 Arron, J.R., Winslow, M.M., Polleri, A., Chang, C.P., Wu, H., Gao, X., Neilson, J.R., Chen,  
1108 L., Heit, J.J., Kim, S.K., *et al.* (2006). NFAT dysregulation by increased dosage of DSCR1  
1109 and DYRK1A on chromosome 21. *Nature* 441, 595-600.  
1110 Ayala, R., Shu, T., and Tsai, L.H. (2007). Trekking across the brain: the journey of  
1111 neuronal migration. *Cell* 128, 29-43.

1112 Ayoub, A.E., Oh, S., Xie, Y., Leng, J., Cotney, J., Dominguez, M.H., Noonan, J.P., and  
1113 Rakic, P. (2011). Transcriptional programs in transient embryonic zones of the cerebral  
1114 cortex defined by high-resolution mRNA sequencing. *Proceedings of the National*  
1115 *Academy of Sciences* *108*, 14950-14955.

1116 Baek, Seung T., Kerjan, G., Bielas, Stephanie L., Lee, Ji E., Fenstermaker, Ali G.,  
1117 Novarino, G., and Gleeson, Joseph G. (2014). Off-Target Effect of doublecortin Family  
1118 shRNA on Neuronal Migration Associated with Endogenous MicroRNA Dysregulation.  
1119 *Neuron* *82*, 1255-1262.

1120 Bassett, A.R., Akhtar, A., Barlow, D.P., Bird, A.P., Brockdorff, N., Duboule, D., Ephrussi,  
1121 A., Ferguson-Smith, A.C., Gingeras, T.R., Haerty, W., *et al.* (2014). Considerations when  
1122 investigating lncRNA function in vivo. *eLife* *3*, e03058.

1123 Bauer, M., Kinkl, N., Meixner, A., Kremmer, E., Riemenschneider, M., Forstl, H., Gasser,  
1124 T., and Ueffing, M. (2009). Prevention of interferon-stimulated gene expression using  
1125 microRNA-designed hairpins. *Gene therapy* *16*, 142-147.

1126 Belgard, T.G., Marques, A.C., Oliver, P.L., Abaan, H.O., Sirey, T.M., Hoerder-  
1127 Suabedissen, A., Garcia-Moreno, F., Molnar, Z., Margulies, E.H., and Ponting, C.P. (2011).  
1128 A Transcriptomic Atlas of Mouse Neocortical Layers. *Neuron* *71*, 605-616.

1129 Benavides-Piccione, R., Dierssen, M., Ballesteros-Yanez, I., Martinez de Lagran, M.,  
1130 Arbones, M.L., Fotaki, V., DeFelipe, J., and Elston, G.N. (2005). Alterations in the  
1131 phenotype of neocortical pyramidal cells in the *Dyrk1A*<sup>+/-</sup> mouse. *Neurobiology of disease*  
1132 *20*, 115-122.

1133 Berghoff, E.G., Clark, M.F., Chen, S., Cajigas, I., Leib, D.E., and Kohtz, J.D. (2013). *Evf2*  
1134 (*Dlx6as*) lncRNA regulates ultraconserved enhancer methylation and the differential  
1135 transcriptional control of adjacent genes. *Development* *140*, 4407-4416.

1136 Boulard, M., Edwards, J.R., and Bestor, T.H. (2015). *FBXL10* protects Polycomb-bound  
1137 genes from hypermethylation. *Nature genetics* *47*, 479-485.

1138 Buchwald, G., van der Stoop, P., Weichenrieder, O., Perrakis, A., van Lohuizen, M., and  
1139 Sixma, T.K. (2006). Structure and E3-ligase activity of the Ring-Ring complex of polycomb  
1140 proteins *Bmi1* and *Ring1b*. *The EMBO journal* *25*, 2465-2474.

1141 Cabianca, D.S., Casa, V., Bodega, B., Xynos, A., Ginelli, E., Tanaka, Y., and Gabellini, D.  
1142 (2012). A long ncRNA links copy number variation to a polycomb/trithorax epigenetic  
1143 switch in FSHD muscular dystrophy. *Cell* *149*, 819-831.

1144 Cheng, M., Jin, X., Mu, L., Wang, F., Li, W., Zhong, X., Liu, X., Shen, W., Liu, Y., and  
1145 Zhou, Y. (2016). Combination of the clustered regularly interspaced short palindromic  
1146 repeats (CRISPR)-associated 9 technique with the piggybac transposon system for  
1147 mouse in utero electroporation to study cortical development. *Journal of neuroscience*  
1148 *research* *94*, 814-824.

1149 Corish, P., and Tyler-Smith, C. (1999). Attenuation of green fluorescent protein half-life in  
1150 mammalian cells. *Protein Engineering, Design and Selection* *12*, 1035-1040.

1151 Diez-Roux, G., Banfi, S., Sultan, M., Geffers, L., Anand, S., Rozado, D., Magen, A.,  
1152 Canidio, E., Pagani, M., Peluso, I., *et al.* (2011). A high-resolution anatomical atlas of the  
1153 transcriptome in the mouse embryo. *PLoS biology* *9*, e1000582.

1154 Dillman, A.A., Hauser, D.N., Gibbs, J.R., Nalls, M.A., McCoy, M.K., Rudenko, I.N., Galter,  
1155 D., and Cookson, M.R. (2013). mRNA expression, splicing and editing in the embryonic  
1156 and adult mouse cerebral cortex. *Nature neuroscience* *16*, 499-506.

1157 Engreitz, J.M., Haines, J.E., Perez, E.M., Munson, G., Chen, J., Kane, M., McDonel, P.E.,  
1158 Guttman, M., and Lander, E.S. (2016). Local regulation of gene expression by lncRNA  
1159 promoters, transcription and splicing. *Nature* *539*, 452-455.

1160 Farcas, A.M., Blackledge, N.P., Sudbery, I., Long, H.K., McGouran, J.F., Rose, N.R., Lee,  
1161 S., Sims, D., Cerase, A., Sheahan, T.W., *et al.* (2012). *KDM2B* links the Polycomb  
1162 Repressive Complex 1 (PRC1) to recognition of CpG islands. *eLife* *1*, e02005.

1163 Fietz, S.A., and Huttner, W.B. (2011). Cortical progenitor expansion, self-renewal and  
1164 neurogenesis—a polarized perspective. *Current opinion in neurobiology* 21, 23-35.

1165 Fotaki, V., Dierssen, M., Alcantara, S., Martinez, S., Marti, E., Casas, C., Visa, J., Soriano,  
1166 E., Estivill, X., and Arbones, M.L. (2002). Dyrk1A haploinsufficiency affects viability and  
1167 causes developmental delay and abnormal brain morphology in mice. *Molecular and*  
1168 *cellular biology* 22, 6636-6647.

1169 Fu, X.-D. (2014). Non-coding RNA: a new frontier in regulatory biology. *National science*  
1170 *review* 1, 190-204.

1171 Gaspard, N., Bouschet, T., Hourez, R., Dimidschstein, J., Naeije, G., van den Aemele, J.,  
1172 Espuny-Camacho, I., Herpoel, A., Passante, L., Schiffmann, S.N., *et al.* (2008). An  
1173 intrinsic mechanism of corticogenesis from embryonic stem cells. *Nature* 455, 351-357.

1174 Ghosh, A., and Greenberg, M.E. (1995). Distinct roles for bFGF and NT-3 in the regulation  
1175 of cortical neurogenesis. *Neuron* 15, 89-103.

1176 Goecks, J., Nekutenko, A., Taylor, J., and Team, T.G. (2010). Galaxy: a comprehensive  
1177 approach for supporting accessible, reproducible, and transparent computational research  
1178 in the life sciences. *Genome Biology* 11, R86.

1179 Greig, L.C., Woodworth, M.B., Galazo, M.J., Padmanabhan, H., and Macklis, J.D. (2013).  
1180 Molecular logic of neocortical projection neuron specification, development and diversity.  
1181 *Nature Reviews Neuroscience* 14, 755-769.

1182 Grote, P., Wittler, L., Hendrix, D., Koch, F., Wahrisch, S., Beisaw, A., Macura, K., Blass,  
1183 G., Kellis, M., Werber, M., *et al.* (2013). The tissue-specific lncRNA Fendrr is an essential  
1184 regulator of heart and body wall development in the mouse. *Developmental cell* 24, 206-  
1185 214.

1186 Guo, C., Eckler, M.J., McKenna, W.L., McKinsey, G.L., Rubenstein, J.L., and Chen, B.  
1187 (2013). Fezf2 expression identifies a multipotent progenitor for neocortical projection  
1188 neurons, astrocytes, and oligodendrocytes. *Neuron* 80, 1167-1174.

1189 Guttman, M., Garber, M., Levin, J.Z., Donaghey, J., Robinson, J., Adiconis, X., Fan, L.,  
1190 Koziol, M.J., Gnirke, A., Nusbaum, C., *et al.* (2010). Ab initio reconstruction of cell type-  
1191 specific transcriptomes in mouse reveals the conserved multi-exonic structure of lincRNAs.  
1192 *Nat Biotech* 28, 503-510.

1193 Hagege, H., Klous, P., Braem, C., Splinter, E., Dekker, J., Cathala, G., de Laat, W., and  
1194 Forne, T. (2007). Quantitative analysis of chromosome conformation capture assays (3C-  
1195 qPCR). *Nature protocols* 2, 1722-1733.

1196 He, J., Kallin, E.M., Tsukada, Y., and Zhang, Y. (2008). The H3K36 demethylase  
1197 Jhd1b/Kdm2b regulates cell proliferation and senescence through p15(Ink4b). *Nature*  
1198 *structural & molecular biology* 15, 1169-1175.

1199 He, J., Shen, L., Wan, M., Taranova, O., Wu, H., and Zhang, Y. (2013). Kdm2b maintains  
1200 murine embryonic stem cell status by recruiting PRC1 complex to CpG islands of  
1201 developmental genes. *Nature cell biology* 15, 373-384.

1202 Heintzman, N.D., Hon, G.C., Hawkins, R.D., Kheradpour, P., Stark, A., Harp, L.F., Ye, Z.,  
1203 Lee, L.K., Stuart, R.K., and Ching, C.W. (2009). Histone modifications at human  
1204 enhancers reflect global cell type-specific gene expression. *Nature* 459, 108.

1205 Hirabayashi, Y., Suzki, N., Tsuboi, M., Endo, T.A., Toyoda, T., Shinga, J., Koseki, H., Vidal,  
1206 M., and Gotoh, Y. (2009). Polycomb limits the neurogenic competence of neural precursor  
1207 cells to promote astrogenic fate transition. *Neuron* 63, 600-613.

1208 Homem, C.C., Repic, M., and Knoblich, J.A. (2015). Proliferation control in neural stem  
1209 and progenitor cells. *Nat Rev Neurosci* 16, 647-659.

1210 Huang, D.W., Sherman, B.T., and Lempicki, R.A. (2008). Systematic and integrative  
1211 analysis of large gene lists using DAVID bioinformatics resources. *Nat Protocols* 4, 44-57.



- 1212 Illingworth, R.S., Botting, C.H., Grimes, G.R., Bickmore, W.A., and Eskeland, R. (2012).  
1213 PRC1 and PRC2 are not required for targeting of H2A.Z to developmental genes in  
1214 embryonic stem cells. *PloS one* 7, e34848.
- 1215 Illingworth, R.S., Moffat, M., Mann, A.R., Read, D., Hunter, C.J., Pradeepa, M.M., Adams,  
1216 I.R., and Bickmore, W.A. (2015). The E3 ubiquitin ligase activity of RING1B is not essential  
1217 for early mouse development. *Genes Dev* 29, 1897-1902.
- 1218 Imayoshi, I., and Kageyama, R. (2014). bHLH factors in self-renewal, multipotency, and  
1219 fate choice of neural progenitor cells. *Neuron* 82, 9-23.
- 1220 Inagaki, T., Iwasaki, S., Matsumura, Y., Kawamura, T., Tanaka, T., Abe, Y., Yamasaki, A.,  
1221 Tsurutani, Y., Yoshida, A., Chikaoka, Y., *et al.* (2015). The FBXL10/KDM2B scaffolding  
1222 protein associates with novel polycomb repressive complex-1 to regulate adipogenesis.  
1223 *The Journal of biological chemistry* 290, 4163-4177.
- 1224 Jiang, Y., Qian, X., Shen, J., Wang, Y., Li, X., Liu, R., Xia, Y., Chen, Q., Peng, G., Lin,  
1225 S.Y., *et al.* (2015). Local generation of fumarate promotes DNA repair through inhibition  
1226 of histone H3 demethylation. *Nature cell biology* 17, 1158-1168.
- 1227 Kent, W.J., Sugnet, C.W., Furey, T.S., Roskin, K.M., Pringle, T.H., Zahler, A.M., and  
1228 Haussler, D. (2002). The human genome browser at UCSC. *Genome research* 12, 996-  
1229 1006.
- 1230 Klattenhoff, C.A., Scheuermann, J.C., Surface, L.E., Bradley, R.K., Fields, P.A.,  
1231 Steinhäuser, M.L., Ding, H., Butty, V.L., Torrey, L., Haas, S., *et al.* (2013). Braveheart, a  
1232 long noncoding RNA required for cardiovascular lineage commitment. *Cell* 152, 570-583.
- 1233 Kottakis, F., Foltopoulou, P., Sanidas, I., Keller, P., Wronski, A., Dake, B.T., Ezell, S.A.,  
1234 Shen, Z., Naber, S.P., Hinds, P.W., *et al.* (2014). NDY1/KDM2B functions as a master  
1235 regulator of polycomb complexes and controls self-renewal of breast cancer stem cells.  
1236 *Cancer research* 74, 3935-3946.
- 1237 Kottakis, F., Polytarchou, C., Foltopoulou, P., Sanidas, I., Kampranis, S.C., and Tsihchlis,  
1238 P.N. (2011). FGF-2 regulates cell proliferation, migration, and angiogenesis through an  
1239 NDY1/KDM2B-miR-101-EZH2 pathway. *Molecular cell* 43, 285-298.
- 1240 Kwan, K.Y., Sestan, N., and Anton, E.S. (2012). Transcriptional co-regulation of neuronal  
1241 migration and laminar identity in the neocortex. *Development* 139, 1535-1546.
- 1242 Labonne, J.D., Lee, K.H., Iwase, S., Kong, I.K., Diamond, M.P., Layman, L.C., Kim, C.H.,  
1243 and Kim, H.G. (2016). An atypical 12q24.31 microdeletion implicates six genes including  
1244 a histone demethylase KDM2B and a histone methyltransferase SETD1B in syndromic  
1245 intellectual disability. *Human genetics* 135, 757-771.
- 1246 Lepoivre, C., Belhocine, M., Bergon, A., Griffon, A., Yammine, M., Vanhille, L., Zacarias-  
1247 Cabeza, J., Garibal, M.-A., Koch, F., Maqbool, M.A., *et al.* (2013). Divergent transcription  
1248 is associated with promoters of transcriptional regulators. *BMC Genomics* 14, 914.
- 1249 Li, H., Lai, P., Jia, J., Song, Y., Xia, Q., Huang, K., He, N., Ping, W., Chen, J., Yang, Z., *et al.*  
1250 (2017a). RNA Helicase DDX5 Inhibits Reprogramming to Pluripotency by miRNA-  
1251 Based Repression of RYBP and its PRC1-Dependent and -Independent Functions. *Cell*  
1252 *stem cell* 20, 462-477.e466.
- 1253 Li, W., Notani, D., Ma, Q., Tanasa, B., Nunez, E., Chen, A.Y., Merkurjev, D., Zhang, J.,  
1254 Ohgi, K., Song, X., *et al.* (2013). Functional roles of enhancer RNAs for oestrogen-  
1255 dependent transcriptional activation. *Nature* 498, 516-520.
- 1256 Li, Y., Wang, W., Wang, F., Wu, Q., Li, W., Zhong, X., Tian, K., Zeng, T., Gao, L., Liu, Y.,  
1257 *et al.* (2017b). Paired related homeobox 1 transactivates dopamine D2 receptor to  
1258 maintain propagation and tumorigenicity of glioma-initiating cells. *Journal of molecular cell*  
1259 *biology*.
- 1260 Liang, G., He, J., and Zhang, Y. (2012). Kdm2b promotes induced pluripotent stem cell  
1261 generation by facilitating gene activation early in reprogramming. *Nature cell biology* 14,  
1262 457-466.

- 1263 Lin, M.F., Jungreis, I., and Kellis, M. (2011). PhyloCSF: a comparative genomics method  
1264 to distinguish protein coding and non-coding regions. *Bioinformatics (Oxford, England)* 27,  
1265 i275-282.
- 1266 Lin, N.W., Chang, K.Y., Li, Z.H., Gates, K., Rana, Z.A., Dang, J.S., Zhang, D.H., Han, T.X.,  
1267 Yang, C.S., Cunningham, T.J., *et al.* (2014). An Evolutionarily Conserved Long Noncoding  
1268 RNA TUNA Controls Pluripotency and Neural Lineage Commitment (vol 53, pg 1005,  
1269 2014). *Molecular Cell* 53, 1067-1067.
- 1270 Liu, B., Ye, B., Yang, L., Zhu, X., Huang, G., Zhu, P., Du, Y., Wu, J., Qin, X., Chen, R., *et*  
1271 *al.* (2017). Long noncoding RNA IncKdm2b is required for ILC3 maintenance by initiation  
1272 of Zfp292 expression. *Nature immunology* 18, 499-508.
- 1273 Luo, S., Lu, J.Y., Liu, L., Yin, Y., Chen, C., Han, X., Wu, B., Xu, R., Liu, W., Yan, P., *et al.*  
1274 (2016). Divergent lncRNAs Regulate Gene Expression and Lineage Differentiation in  
1275 Pluripotent Cells. *Cell stem cell* 18, 637-652.
- 1276 Madisen, L., Zwingman, T.A., Sunkin, S.M., Oh, S.W., Zariwala, H.A., Gu, H., Ng, L.L.,  
1277 Palmiter, R.D., Hawrylycz, M.J., Jones, A.R., *et al.* (2010). A robust and high-throughput  
1278 Cre reporting and characterization system for the whole mouse brain. *Nature*  
1279 *neuroscience* 13, 133-140.
- 1280 Mercer, T.R., Qureshi, I.A., Gokhan, S., Dinger, M.E., Li, G.Y., Mattick, J.S., and Mehler,  
1281 M.F. (2010). Long noncoding RNAs in neuronal-glia fate specification and  
1282 oligodendrocyte lineage maturation. *Bmc Neuroscience* 11.
- 1283 Molyneaux, B.J., Goff, L.A., Brettler, A.C., Chen, H.H., Brown, J.R., Hrvatin, S., Rinn, J.L.,  
1284 and Arlotta, P. (2015). DeCoN: genome-wide analysis of in vivo transcriptional dynamics  
1285 during pyramidal neuron fate selection in neocortex. *Neuron* 85, 275-288.
- 1286 Morimoto-Suzki, N., Hirabayashi, Y., Tyssowski, K., Shinga, J., Vidal, M., Koseki, H., and  
1287 Gotoh, Y. (2014). The polycomb component Ring1B regulates the timed termination of  
1288 subcerebral projection neuron production during mouse neocortical development.  
1289 *Development* 141, 4343-4353.
- 1290 Ng, A., and Xavier, R.J. (2011). Leucine-rich repeat (LRR) proteins: integrators of pattern  
1291 recognition and signaling in immunity. *Autophagy* 7, 1082-1084.
- 1292 Ng, S.Y., Bogu, G.K., Soh, B.S., and Stanton, L.W. (2013). The Long Noncoding RNA  
1293 RMST Interacts with SOX2 to Regulate Neurogenesis. *Molecular Cell* 51, 349-359.
- 1294 Noonan, F.C., Goodfellow, P.J., Staloch, L.J., Mutch, D.G., and Simon, T.C. (2003).  
1295 Antisense transcripts at the EMX2 locus in human and mouse. *Genomics* 81, 58-66.
- 1296 Ørom, U.A., Derrien, T., Beringer, M., Gumireddy, K., Gardini, A., Bussotti, G., Lai, F.,  
1297 Zytnicki, M., Notredame, C., Huang, Q., *et al.* (2010). Long Noncoding RNAs with  
1298 Enhancer-like Function in Human Cells. *Cell* 143, 46-58.
- 1299 Perino, M., and Veenstra, G.J. (2016). Chromatin Control of Developmental Dynamics and  
1300 Plasticity. *Dev Cell* 38, 610-620.
- 1301 Ponjavic, J., Oliver, P.L., Lunter, G., and Ponting, C.P. (2009). Genomic and  
1302 transcriptional co-localization of protein-coding and long non-coding RNA pairs in the  
1303 developing brain. *PLoS genetics* 5, e1000617.
- 1304 Ramos, Alexander D., Diaz, A., Nellore, A., Delgado, Ryan N., Park, K.-Y., Gonzales-  
1305 Roybal, G., Oldham, Michael C., Song, Jun S., and Lim, Daniel A. (2013). Integration of  
1306 Genome-wide Approaches Identifies lncRNAs of Adult Neural Stem Cells and Their  
1307 Progeny In Vivo. *Cell stem cell* 12, 616-628.
- 1308 Rinn, J.L., and Chang, H.Y. (2012). Genome Regulation by Long Noncoding RNAs.  
1309 *Annual Review of Biochemistry*, Vol 81 81, 145-166.
- 1310 Roberts, T.C., Hart, J.R., Kaikkonen, M.U., Weinberg, M.S., Vogt, P.K., and Morris, K.V.  
1311 (2015). Quantification of nascent transcription by bromouridine immunocapture nuclear  
1312 run-on RT-qPCR. *Nature protocols* 10, 1198-1211.



1313 Saba, L.M., Flink, S.C., Vanderlinden, L.A., Israel, Y., Tampier, L., Colombo, G., Kiianmaa,  
1314 K., Bell, R.L., Printz, M.P., Flodman, P., *et al.* (2015). The sequenced rat brain  
1315 transcriptome--its use in identifying networks predisposing alcohol consumption. The  
1316 FEBS journal 282, 3556-3578.

1317 Scruggs, B.S., and Adelman, K. (2015). The Importance of Controlling Transcription  
1318 Elongation at Coding and Noncoding RNA Loci. Cold Spring Harbor symposia on  
1319 quantitative biology 80, 33-44.

1320 Scruggs, B.S., Gilchrist, D.A., Nechaev, S., Muse, G.W., Burkholder, A., Fargo, D.C., and  
1321 Adelman, K. (2015). Bidirectional Transcription Arises from Two Distinct Hubs of  
1322 Transcription Factor Binding and Active Chromatin. Molecular cell 58, 1101-1112.

1323 Shen, Q., Wang, Y., Dimos, J.T., Fasano, C.A., Phoenix, T.N., Lemischka, I.R., Ivanova,  
1324 N.B., Stifani, S., Morrisey, E.E., and Temple, S. (2006). The timing of cortical  
1325 neurogenesis is encoded within lineages of individual progenitor cells. Nature  
1326 Neuroscience 9, 743-751.

1327 Sigova, A.A., Mullen, A.C., Molinie, B., Gupta, S., Orlando, D.A., Guenther, M.G., Almada,  
1328 A.E., Lin, C., Sharp, P.A., Giallourakis, C.C., *et al.* (2013). Divergent transcription of long  
1329 noncoding RNA/mRNA gene pairs in embryonic stem cells. Proceedings of the National  
1330 Academy of Sciences of the United States of America 110, 2876-2881.

1331 Sinnamon, J.R., Waddell, C.B., Nik, S., Chen, E.I., and Czaplinski, K. (2012). Hnrpab  
1332 regulates neural development and neuron cell survival after glutamate stimulation. RNA  
1333 (New York, NY) 18, 704-719.

1334 Spigoni, G., Gedressi, C., and Mallamaci, A. (2010). Regulation of Emx2 expression by  
1335 antisense transcripts in murine cortico-cerebral precursors. PloS one 5, e8658.

1336 Trapnell, C., Pachter, L., and Salzberg, S.L. (2009). TopHat: discovering splice junctions  
1337 with RNA-Seq. Bioinformatics 25, 1105-1111.

1338 Trapnell, C., Roberts, A., Goff, L., Pertea, G., Kim, D., Kelley, D.R., Pimentel, H., Salzberg,  
1339 S.L., Rinn, J.L., and Pachter, L. (2012). Differential gene and transcript expression  
1340 analysis of RNA-seq experiments with TopHat and Cufflinks. Nat Protocols 7, 562-578.

1341 Trimarchi, T., Bilal, E., Ntziachristos, P., Fabbri, G., Dalla-Favera, R., Tsirigos, A., and  
1342 Aifantis, I. (2014). Genome-wide Mapping and Characterization of Notch-Regulated Long  
1343 Noncoding RNAs in Acute Leukemia. Cell 158, 593-606.

1344 Tsai, M.C., Manor, O., Wan, Y., Mosammaparast, N., Wang, J.K., Lan, F., Shi, Y., Segal,  
1345 E., and Chang, H.Y. (2010). Long noncoding RNA as modular scaffold of histone  
1346 modification complexes. Science 329, 689-693.

1347 Venkov, C.D., Link, A.J., Jennings, J.L., Plieth, D., Inoue, T., Nagai, K., Xu, C., Dimitrova,  
1348 Y.N., Rauscher, F.J., and Neilson, E.G. (2007). A proximal activator of transcription in  
1349 epithelial-mesenchymal transition. The Journal of clinical investigation 117, 482-491.

1350 Vescovi, A.L., Reynolds, B.A., Fraser, D.D., and Weiss, S. (1993). bFGF regulates the  
1351 proliferative fate of unipotent (neuronal) and bipotent (neuronal/astroglial) EGF-generated  
1352 CNS progenitor cells. Neuron 11, 951-966.

1353 Vickers, T.A., Koo, S., Bennett, C.F., Crooke, S.T., Dean, N.M., and Baker, B.F. (2003).  
1354 Efficient reduction of target RNAs by small interfering RNA and RNase H-dependent  
1355 antisense agents A comparative analysis. Journal of Biological Chemistry 278, 7108-7118.

1356 Vierstra, J., Rynes, E., Sandstrom, R., Zhang, M., Canfield, T., Hansen, R.S., Stehling-  
1357 Sun, S., Sabo, P.J., Byron, R., Humbert, R., *et al.* (2014). Mouse regulatory DNA  
1358 landscapes reveal global principles of cis-regulatory evolution. Science 346, 1007-1012.

1359 Walder, R.Y., and Walder, J.A. (1988). Role of RNase H in hybrid-arrested translation by  
1360 antisense oligonucleotides. Proceedings of the National Academy of Sciences 85, 5011-  
1361 5015.

1362 Wang, A., Wang, J., Liu, Y., and Zhou, Y. (2017). Mechanisms of Long Non-Coding RNAs  
1363 in the Assembly and Plasticity of Neural Circuitry. Frontiers in neural circuits 11, 76.

- 1364 Wang, K.C., Yang, Y.W., Liu, B., Sanyal, A., Corces-Zimmerman, R., Chen, Y., Lajoie,  
1365 B.R., Protacio, A., Flynn, R.A., Gupta, R.A., *et al.* (2011a). A long noncoding RNA  
1366 maintains active chromatin to coordinate homeotic gene expression. *Nature* 472, 120-  
1367 U158.
- 1368 Wang, L., Park, H.J., Dasari, S., Wang, S., Kocher, J.P., and Li, W. (2013). CPAT: Coding-  
1369 Potential Assessment Tool using an alignment-free logistic regression model. *Nucleic  
1370 acids research* 41, e74.
- 1371 Wang, T., Chen, K., Zeng, X., Yang, J., Wu, Y., Shi, X., Qin, B., Zeng, L., Esteban, M.A.,  
1372 Pan, G., *et al.* (2011b). The histone demethylases Jhdm1a/1b enhance somatic cell  
1373 reprogramming in a vitamin-C-dependent manner. *Cell stem cell* 9, 575-587.
- 1374 Wang, Y., He, L., Du, Y., Zhu, P., Huang, G., Luo, J., Yan, X., Ye, B., Li, C., Xia, P., *et al.*  
1375 (2015). The Long Noncoding RNA lncTCF7 Promotes Self-Renewal of Human Liver  
1376 Cancer Stem Cells through Activation of Wnt Signaling. *Cell stem cell* 16, 413-425.
- 1377 Wu, M., Wang, P.F., Lee, J.S., Martin-Brown, S., Florens, L., Washburn, M., and  
1378 Shilatifard, A. (2008). Molecular regulation of H3K4 trimethylation by Wdr82, a component  
1379 of human Set1/COMPASS. *Molecular and cellular biology* 28, 7337-7344.
- 1380 Wu, X., Johansen, J.V., and Helin, K. (2013). Fbxl10/Kdm2b Recruits Polycomb  
1381 Repressive Complex 1 to CpG Islands and Regulates H2A Ubiquitylation. *Molecular cell.*  
1382 Xing, Y.H., Yao, R.W., Zhang, Y., Guo, C.J., Jiang, S., Xu, G., Dong, R., Yang, L., and  
1383 Chen, L.L. (2017). SLERT Regulates DDX21 Rings Associated with Pol I Transcription.  
1384 *Cell* 169, 664-678.e616.
- 1385 Ye, B., Liu, B., Yang, L., Zhu, X., Zhang, D., Wu, W., Zhu, P., Wang, Y., Wang, S., Xia, P.,  
1386 *et al.* (2018). lncKdm2b controls self-renewal of embryonic stem cells via activating  
1387 expression of transcription factor Zbtb3. *The EMBO journal* 37.
- 1388 Yin, Y., Yan, P., Lu, J., Song, G., Zhu, Y., Li, Z., Zhao, Y., Shen, B., Huang, X., Zhu, H.,  
1389 *et al.* (2015). Opposing Roles for the lncRNA Haunt and Its Genomic Locus in Regulating  
1390 HOXA Gene Activation during Embryonic Stem Cell Differentiation. *Cell stem cell* 16, 504-  
1391 516.
- 1392 Yue, F., Cheng, Y., Breschi, A., Vierstra, J., Wu, W., Ryba, T., Sandstrom, R., Ma, Z.,  
1393 Davis, C., Pope, B.D., *et al.* (2014). A comparative encyclopedia of DNA elements in the  
1394 mouse genome. *Nature* 515, 355-364.
- 1395 Zhou, Z.-J., Dai, Z., Zhou, S.-L., Hu, Z.-Q., Chen, Q., Zhao, Y.-M., Shi, Y.-H., Gao, Q., Wu,  
1396 W.-Z., Qiu, S.-J., *et al.* (2014). HNRNPAB Induces Epithelial–Mesenchymal Transition and  
1397 Promotes Metastasis of Hepatocellular Carcinoma by Transcriptionally Activating SNAIL.  
1398 *Cancer research* 74, 2750-2762.

## 1399 **Main Figure Titles and Legends**

### 1400 **Figure 1. *LncKdm2b* and *Kdm2b* are Transiently Expressed in the Developing** 1401 **Mouse Embryonic Cortex**

1402 (A) Schematic illustration of the mouse *LncKdm2b/Kdm2b* locus. The top tracks depict  
1403 ChIP-seq signals for Pol II, H3K4me3 and H3K36me3 in E14.5 mouse brain. Bottom  
1404 tracks depict a parallel genomic alignment of 19 vertebrates to the mouse genome  
1405 (UCSC mm9) at the *LncKdm2b* locus. Shaded lines indicate conserved sequences.

1406 (B) Top: *In situ* hybridization (ISH) of *LncKdm2b* (left) and *Kdm2b* (right) on coronal  
1407 sections of E16.5 mouse dorsal forebrains. Bottom: Immunofluorescent staining for  
1408 TBR2 (green) on ISH sections of *LncKdm2b* (left, red) and *Kdm2b* (right, red) on coronal  
1409 sections of E16.5 mouse dorsal forebrains.

1410 (C) A schematic diagram illustrates the strategy for generating *Kdm2b*<sup>CreERT2</sup> knock-in  
1411 mice line.

1412 (D) Left: Immunofluorescent staining for EGFP (green), TBR2 (red), and TUJ1 (blue) on  
1413 cortical sections of E16.5 heterozygous *Kdm2b*<sup>CreERT2</sup> knock-in mice. Right:  
1414 Immunofluorescent stainings for EGFP (green) and UNC5D (red) on cortical sections of  
1415 E16.5 heterozygous *Kdm2b*<sup>CreERT2</sup> knock-in mice.

1416 (E) A schematic diagram illustrates the strategy for lineage tracing of *Kdm2b*-expressing  
1417 cortical cells using *in utero* electroporation.

1418 (F) E12.5 *Kdm2b*<sup>CreERT2/+</sup> knock-in cortices were electroporated with conditional DsRed-  
1419 expressing plasmids (pCALNL), followed by tamoxifen (TAM) injection at E12.75 and  
1420 analyses for SATB2 (green) and CTIP2 (blue) expression at P0. Arrowheads indicate  
1421 DsRed+, SATB2+ cells. Arrows indicate DsRed+, CTIP2+ cells.

1422 (G) Quantification of SATB2 or CTIP2 expression in DsRed+ recombined cells (F). A  
1423 total of 711 cells from 3 animals were analyzed. Data shown are the mean + SD.

1424 Scale bars, 50  $\mu$ m. Boxed areas are enlarged at the bottom-right corners in (B), (D) and  
1425 (F). Ctx, cortex; LV, lateral ventricle; VZ, ventricular zone; SVZ, subventricular zone; IZ,  
1426 intermediate zone. pA, polyA. See also Figure 1 - figure supplement 1 and 2.

1427

## 1428 **Figure 2. *LncKdm2b* maintains *Kdm2b* Transcription in *cis***

1429 (A) RT-qPCR analysis of *LncKdm2b* and *Kdm2b* RNA levels in Neuro-2a cells treated for  
1430 two days with Scramble ASOs or ASOs targeting *LncKdm2b*.

1431 (B) Representative immunoblotting of Neuro-2a cells treated for four days with indicated  
1432 ASOs using antibody against KDM2B and  $\beta$ -TUBULIN.

1433 (C) RT-qPCR analysis of *LncKdm2b* and *Kdm2b* RNA levels in adherent cultures  
1434 derived from E12.5 cortices. The cultures were treated with indicated shRNAs.

1435 (D) RT-qPCR analysis of *LncKdm2b* and *Kdm2b* RNA levels in wild-type or *LncKdm2b*'s  
1436 exon 2 knockout NE-4C cells. The expression levels of individual exons of *LncKdm2b*  
1437 were examined.

1438 (E) Left: Schematic diagram showing the insertion of a pAS cassette at 1.8 kb  
1439 downstream the TSS of *LncKdm2b* in mESC<sup>*LncKdm2b*-pAS/+</sup>. pAS, 3 × SV40 polyA and a  
1440 BGH polyA signal. Right: RT-qPCR analysis of *Kdm2b* mRNA levels in mESC<sup>*LncKdm2b*-</sup>  
1441 <sup>*pAS/+*</sup> and wild-type mESCs.

1442 (F) Left: Schematic diagram showing the indels of *Kdm2b*'s second exon in two  
1443 mESC<sup>*LncKdm2b*-pAS/+</sup> clones, 1B1 and 2D5. Right: RT-qPCR analysis of *Kdm2b*'s  
1444 expression levels from individual alleles of clone 1B1 and 2D5. The y-axis represents  
1445 relative expression normalized to genomic DNA.

1446 (G) The effects of *LncKdm2b* knockdown on nascent transcripts in nuclear run-on  
1447 assays. RT-qPCR analysis of *LncKdm2b*, and *Kdm2b* nascent transcripts in Neuro-2a  
1448 cells treated for two days with scramble ASO or ASOs targeting *LncKdm2b*. The y-axis  
1449 represents relative expression normalized to *Gapdh* nascent transcript.

1450 In (A), (C), and (D-G), quantification data are shown as mean + SD (n = 3 unless  
1451 otherwise indicated). In (A), (C-D), and (G), statistical significance was determined using  
1452 2-way ANOVA followed by the Bonferroni's post hoc test. In (E-F), statistical significance  
1453 was determined using unpaired 2-tailed Student's t test. \*  $p < 0.05$ , \*\*  $p < 0.01$ , \*\*\*  
1454  $p < 0.001$ , "NS" indicates no significance. The y-axis represents relative expression  
1455 normalized to *Gapdh* transcript unless otherwise indicated.

1456 See also Figure 2 - figure supplement 1.

1457

1458 **Figure 3. *LncKdm2b* Regulates the Configuration of *Kdm2b*'s *cis*-elements**

1459 (A) Schematic illustration of the *LncKdm2b/Kdm2b* locus. The top tracks show ChIP-seq  
1460 signals of H3K4me3, H3K27ac, H3K4me1, H3K27me3 and CTCF; and DNase I  
1461 hypersensitivity (HS) in E14.5 mouse brain, along with sequence conservation among  
1462 mammals. Bottom tracks show a higher-magnification view of the genomic region covering  
1463 the promoter for *Kdm2b* and its upstream region that transcribes *LncKdm2b*. Indigo box  
1464 indicates the conservative region T5 that is also enriched with H3K4me1. KUS, *Kdm2b*  
1465 upstream sequence. T1 to T7 marks putative regulatory *cis*-elements.

1466 (B) Relative crosslinking frequency measured in Neuro-2a cells by 3C-qPCR using a  
1467 constant primer in an EcoR I fragment at the *Kdm2b* TSS. Cells were treated with  
1468 Scramble ASO or a mix of ASOs targeting *LncKdm2b* (ASO 1, 2, 3, 4) for two days.  
1469 Crosslinking frequency is relative to a negative region (the magenta arrow).

1470 (C) Luciferase activities in experiments where indicated vectors were transfected into  
1471 Neuro-2a cells for 24 hours. 'Forward' and 'Reverse' indicate directions same as or  
1472 opposite to *Kdm2b*'s transcription orientation.

1473 (D) E13.5 mouse cortices were electroporated with *KUS*-d2EGFP or *KUSR*-d2EGFP,  
1474 along with CAG-driving mCherry-expressing vectors. Embryos were sacrificed at E15.5,  
1475 followed by TBR2 immunofluorescent stainings on coronal cortical sections. Scale bars,  
1476 50  $\mu$ m. *KUSR*: *Kdm2b* upstream sequence, reversed.

1477 (E) RT-qPCR analysis of *LncKdm2b* and *Kdm2b* RNA levels in NE-4C cells with the T5  
1478 region knocked out.

1479 (F) RT-qPCR analysis of *LncKdm2b* and *Kdm2b* RNA levels in cortical cells with the T5  
1480 region knocked out. EGFP+ cells express gRNAs and the Cas9 protein.

1481 In (B), quantification data are shown as mean  $\pm$  SD (n = 3). In (C), (E), and (F),  
1482 quantification data are shown as mean + SD (n = 3). In (B), statistical significance was

1483 determined using 2-tailed Student's t test. In (C), statistical significance was determined  
1484 using 1-way ANOVA with Tukey's post hoc tests. In (E) and (F), statistical significance  
1485 was determined using 2-way ANOVA followed by the Bonferroni's post hoc test. \*  $p < 0.05$ ,  
1486 \*\*  $p < 0.01$ , \*\*\*  $p < 0.001$ , "NS" indicates no significance. The y-axis represents relative  
1487 expression normalized to *Gapdh*.

1488 See also Figure 3 - figure supplement 1.

1489

1490 **Figure 4. *LncKdm2b* Transcripts Can Activate Gene Expression and Modulate Local**  
1491 **Chromatin State**

1492 (A) Identification of proteins associated with *LncKdm2b*. Protein extracts from E14.5  
1493 mouse cortices were incubated with the biotinylated *LncKdm2b* (sense) or control  
1494 (antisense *LncKdm2b*) followed by SDS-PAGE and silver staining.

1495 (B) Immunoblots of hnRNPAB and SATB1 of protein extracts that are associated with  
1496 sense or antisense *LncKdm2b* in Neuro-2a cells.

1497 (C-D) RNA immunoprecipitation (RIP) of anti-hnRNPAB and control IgG antibodies in  
1498 native (N-RIP, C) and formaldehyde treated (F-RIP, D) Neuro-2a cells. Extracted RNAs  
1499 were subjected to RT-qPCR analysis of indicated transcripts.

1500 (E) Digoxigenin-labeled *LncKdm2b* truncations were incubated with Flag-hnRNPAB  
1501 bound to anti-Flag-agarose beads. hnRNPAB associated RNAs were chemiluminescently  
1502 detected.

1503 (F) Left: schematic diagram showing the putative stem-loop structure in *LncKdm2b*'s 455-  
1504 908 nt region. Right: point mutations made to disrupt hairpin formation.

1505 (G) Digoxigenin-labeled *LncKdm2b*'s stem loops described in (F) were incubated with  
1506 Flag-hnRNPAB bound to anti-Flag-agarose beads. hnRNPAB associated RNAs were  
1507 chemiluminescently detected.

1508 (H) EMSA assays of digoxigenin-labeled *LncKdm2b* RNA (463-625 nt) incubated with



1509 purified hnRNPAB.

1510 (I-J) Schematic illustration of primer sets used in ChIP-qPCR experiments around the TSS  
1511 of the *LncKdm2b/Kdm2b* locus (I) and the T5 region (J). *Kdm2b*'s promoter region  
1512 (*pKdm2b*) and the putative hnRNPAB-binding CArG box for luciferase reporter assay in  
1513 (M) was also shown.

1514 (K-L) ChIP-qPCR analysis of indicated primer sets showed in (I-J) enriched by anti-  
1515 hnRNPAB antibody upon depletion of *LncKdm2b*. The y-axis shows fold enrichment  
1516 normalized to scramble ASO control.

1517 (M) Relative luciferase activity of T5 region with or without the CArG box in Neuro-2a cells.  
1518 Cells were treated for two days with siRNAs against hnRNPAB.

1519 (N) Relative crosslinking frequency between the T5 and *Kdm2b*'s TSS upon hnRNPAB  
1520 depletion measured by 3C-qPCR in Neuro-2a cells. The y-axis shows fold enrichment  
1521 normalized to the scramble control (siNC).

1522 (O-P) Neuro-2a cells were treated with Scramble ASO or a mix of ASOs targeting  
1523 *LncKdm2b* (ASO 1, 2, 3, 4) for 48 hours before ChIP-qPCR of H3K4me3 (O), and  
1524 H3K27ac (P) at the *Kdm2b* promoter. The y-axis shows fold enrichment normalized to the  
1525 input. Positions of promoter primers are shown on the bottom of Figure 3A.

1526 Quantification data are shown as mean + SD (n = 3). In (C-D), (K-M), and (O-P), statistical  
1527 significance was determined using 2-tailed Student's t test. In (N), statistical significance  
1528 was determined using 1-way ANOVA with Tukey's post hoc tests. \*  $p < 0.05$ , \*\*  $p < 0.01$ , \*\*\*  
1529  $p < 0.001$ , "NS" indicates no significance.

1530 See also Figure 4 - figure supplement 1.

1531

### 1532 **Figure 5. *Kdm2b* promotes Cortical Neurogenesis**

1533 (A-E) E13.5 mouse cortices were electroporated with empty or KDM2B-expressing vector,  
1534 along with mCherry-expressing vector to label transduced cells. Embryos were sacrificed

1535 at E15.5 for immunofluorescent analysis. Coronal Sections were stained for DAPI (A), and  
1536 the relative location of mCherry-positive cells was quantified (B). Ten embryos in control  
1537 and nine embryos in KDM2B-overexpression. Representative VZ/SVZ images of control  
1538 and KDM2B-expressing cortices immunostained for TBR2 (top) and PAX6 (bottom).  
1539 Arrowheads denote double-labeled cells (C). Quantification of TBR2+ (D) or PAX6+ (E)  
1540 cells in transduced cells.

1541 (F-N) E13.5 mouse cortices were electroporated with indicated combination of vectors,  
1542 with transduced cells labeled with EGFP. Embryos were sacrificed at E16.5 for  
1543 immunofluorescent analyses. The relative location of EGFP+ cells was quantified (F-G).  
1544 Three embryos in scramble, and shKDM2B, five embryos in shKDM2B plus KDM2B.  
1545 Representative VZ/SVZ images of scramble or KDM2B shRNA electroporated sections  
1546 immunostained for TBR2 (H) and quantification of TBR2+ transduced cells (I).  
1547 Representative VZ/SVZ images of scramble or KDM2B shRNA electroporated sections  
1548 immunostained for PAX6 (J) and quantification of PAX6+ transduced cells (K). Sections  
1549 were co-immunostained with PAX6 and BrdU (30 minutes) (L). Percentiles of BrdU+  
1550 transduced cells (M), and of BrdU+PAX6+EGFP+ / PAX6+EGFP+ cells (N).

1551 In (B), (D-E), (G), (I), (K), and (M-N), quantification data are shown as mean + SEM.

1552 In (B), (D-E), (I), (K), and (M-N), statistical significance was determined using 2-tailed  
1553 Student's t test. In (G), statistical significance was determined using 2-way ANOVA  
1554 followed by the Bonferroni's post hoc test. \*  $p < 0.05$ , \*\*  $p < 0.01$ , \*\*\*  $p < 0.001$ , "NS" indicates  
1555 no significance.

1556 Scale bars, 50  $\mu\text{m}$ . VZ, ventricular zone; SVZ, subventricular zone; IZ, intermediate zone;  
1557 CP, cortical plate.

1558 See also Figure 5 - figure supplement 1.

1559

1560 **Figure 6. KDM2B relies on its leucine-rich repeats (LRR) to promote cortical**



1561 **neurogenesis**

1562 (A-D) E13.5 mouse cortices were electroporated with indicated combinations of vectors,  
1563 with transduced cells labeled with EGFP. Embryos were sacrificed at E16.5 for PAX6  
1564 immunofluorescent stainings (A). Three embryos in scramble and KDM2B shRNA, six  
1565 embryos in KDM2B shRNA plus KDM2B-mJmjC and KDM2B shRNA plus KDM2B- $\Delta$ CxxC,  
1566 five embryos in KDM2B shRNA plus KDM2B-mPHD, four embryos in KDM2B shRNA plus  
1567 KDM2B- $\Delta$ Fbox, and five embryos in KDM2B shRNA plus KDM2B- $\Delta$ LRR. The relative  
1568 location of EGFP+ cells (B) and percentiles of PAX6+ transduced cells (C) were quantified.  
1569 Illustration showing KDM2B constructs for rescue assays (D).

1570 (E-G) E13.5 mouse cortices were electroporated with empty or KDM2B- $\Delta$ LRR-expressing  
1571 vector, along with EGFP-expressing vectors to label transduced cells. Embryos were  
1572 sacrificed at E16.5 for PAX6 immunofluorescent analysis (E). The relative location of  
1573 EGFP+ cells (F) and percentiles of PAX6+ transduced cells (G) were quantified. Six  
1574 embryos each.

1575 In (B-C) and (F-G), quantification data are shown as mean + SEM. In (B), statistical  
1576 significance was determined using 2-way ANOVA followed by the Bonferroni's post hoc  
1577 test. In (C), statistical significance was determined using 1-way ANOVA with Tukey's post  
1578 hoc tests. In (F-G), statistical significance was determined using 2-tailed Student's t test.

1579 \*  $p < 0.05$ , \*\*  $p < 0.01$ , \*\*\*  $p < 0.001$ , "NS" indicates no significance.

1580 Scale bars, 50  $\mu$ m. VZ, ventricular zone; SVZ, subventricular zone; IZ, intermediate zone;  
1581 CP, cortical plate.

1582 See also Figure 6 - figure supplement 1.

1583

1584 **Figure 7. *LncKdm2b* Maintains Mouse Cortical Neurogenesis through KDM2B**

1585 (A-G) E12.5 cortical neural precursors were infected with lentivirus expressing indicated  
1586 shRNAs for three days followed by immunostaining of SOX2 and TUJ1. Transfected cells

1587 were labeled with ZsGreen. Quantification analyses were performed to calculate  
1588 percentiles of SOX2+ (A) or TUJ1+ (B) ZsGreen+ transduced cells; percentiles of clones  
1589 with at least one SOX2+ precursor (C), clones with at least one TUJ1+ neuron (D), neuron  
1590 only clones (E); and the average number of SOX2+ cells in SOX2+ clones (F-G).

1591 (H-J) E13.5 mouse cortices were electroporated with indicated siRNAs and vectors, with  
1592 transduced cells labeled with EGFP. Embryos were sacrificed at E16.5 for PAX6  
1593 immunofluorescent staining (H). The relative location of EGFP+ cells (I) and percentiles  
1594 of PAX6+ transduced cells (J) were quantified. Three embryos in control (siNC), five  
1595 embryos in siKDM2B, *LncKdm2b* ASO, and *LncKdm2b* ASO plus KDM2B.

1596 (K-M) E13.5 mouse cortices were electroporated with indicated siRNAs, with transduced  
1597 cells labeled with EGFP. Embryos were sacrificed at E16.5 for PAX6 immunofluorescent  
1598 stainings (K). The relative location of EGFP+ cells (L) and percentiles of PAX6+  
1599 transduced cells (M) were quantified. Three embryos each.

1600 (N) A model for *LncKdm2b* promoting cortical neurogenesis by *cis*-activating *Kdm2b*.  
1601 *LncKdm2b* and *Kdm2b* are transiently expressed in freshly born projection neurons.  
1602 *LncKdm2b* RNA facilitates an open chromatin configuration locally by bringing together  
1603 the upstream regulatory *cis*-element T5, *Kdm2b* promoter and hnRNPAB to maintain  
1604 *Kdm2b*'s transcription.

1605 In (A-G), (I-J), and (L-M), quantification data are shown as mean + SEM. In (A-G), (J),  
1606 statistical significance was determined using 1-way ANOVA with Tukey's post hoc tests.  
1607 In (I), statistical significance was determined using 2-way ANOVA followed by the  
1608 Bonferroni's post hoc test. In (L-M), statistical significance was determined using 2-tailed  
1609 Student's t test. \*  $p < 0.05$ , \*\*  $p < 0.01$ , \*\*\*  $p < 0.001$ , "NS" indicates no significance.

1610 Scale bars, 50  $\mu$ m. VZ, ventricular zone; SVZ, subventricular zone; IZ, intermediate zone;  
1611 CP, cortical plate. RGC, radial glial cells; IPC, intermediate progenitor cells; imPN,  
1612 immature projection neurons; mPN, mature projection neurons; LOF, loss-of-function;

1613 GOF, gain-of-function.

1614 See also Figure 7 - figure supplement 1.

1615

## 1616 **Supplementary Figure Titles and Legends**

### 1617 **Figure 1 - figure supplement 1. *LncKdm2b* and *Kdm2b* are Transiently Expressed in** 1618 **the Developing Mouse Embryonic Cortex. Related to Figure 1.**

1619 (A) Gene ontology (GO) analysis of coding genes associated with divergent lncRNAs. The  
1620 top GO terms ( $>1.5$ -fold and  $P < 1 \times 10^{-6}$ ) are shown.

1621 (B) Protein-coding scores of *LncKdm2b* using CPAT and PhyloCSF programs.

1622 (C) *LncKdm2b*'s longest ORF fused with the 3 × Flag tag sequence at its 3' was cloned  
1623 into pcDNA3.1 vector for HEK293T cell transfection. After 48 hours, immunoblotting was  
1624 performed to detect Flag-tagged proteins. KDM2B-ΔJmjc tagged with 3 × Flag tag served  
1625 as a positive control. Data are representative of three independent experiments. ' \* '   
1626 indicates predicted molecular weight encoded by *Flag*-tagged *LncKdm2b*'s ORF.

1627 (D) Fragments per kilobase per million mapped reads (FPKM) values for *LncKdm2b*, and  
1628 *Kdm2b* in mouse ESCs, mouse NPCs and mouse cortices at indicated developmental  
1629 stages.

1630 (E-L) RT-qPCR analyses of indicated markers of E10.5, E12.5, E14.5 and adult (6 weeks)  
1631 mouse dorsal forebrains. The y-axis represents relative expression normalized to *Gapdh*.

1632 (M) Representative immunoblotting of mouse dorsal forebrains using antibodies against  
1633 KDM2B and β-TUBULIN.

1634 (N) Northern blots of *LncKdm2b* and *Gapdh* using poly(A) RNAs extracted from mouse  
1635 dorsal forebrains.

1636 (O) Schematic illustration of *in situ* hybridization probes for mouse *LncKdm2b* and *Kdm2b*.

1637 (P) *In situ* hybridization (ISH) of *LncKdm2b* on coronal sections of E12.5 mouse forebrain  
1638 (the CD-1 strain). Scale bars, 100 μm. The higher-magnification image of the boxed area

1639 shows immunofluorescent staining for TBR2 (green) and TUJ1 on ISH section of  
1640 *LncKdm2b* (red). Scale bars, 50  $\mu$ m.

1641 (Q) Southern blot analysis of genomic DNA from wild-type (WT) or *Kdm2b*<sup>CreERT2/+</sup> knock-  
1642 in mice.

1643 (R-S) Immunofluorescent staining for EGFP (green), TBR2 (red), TUJ1 (blue), UNC5D  
1644 (red), and DAPI (blue) on cortical sections of E14.5 *Kdm2b*<sup>CreERT2/+</sup> mice. Boxed areas are  
1645 enlarged at the bottom-right corners. Scale bars, 50  $\mu$ m.

1646 In (E-L), quantification data are shown as mean + SD (n = 3 unless otherwise indicated).  
1647 Ctx, cortex; LV, lateral ventricle; VZ, ventricular zone; SVZ, subventricular zone; IZ,  
1648 intermediate zone.

1649

1650 **Figure 1 - figure supplement 2. *Kdm2b*-expressing cortical cells are fated to be**  
1651 **cortical projection neurons. Related to Figure 1.**

1652 (A-D) Immunofluorescent staining for SATB2 and CTIP2 on coronal cortical sections of  
1653 E16.5 (A) and P0 (C) *Kdm2b*<sup>CreERT2/+</sup>;*Ai14* embryos. Tamoxifen (TAM, 100 mg/kg) was  
1654 injected at E12.5 or E14.5 respectively. Boxed areas are enlarged at the bottom-right  
1655 corners. Quantification of SATB2 or CTIP2 expression in tdTomato<sup>+</sup> recombined cells (B  
1656 and D). A total of 3372 cells from 2 embryos were analyzed in (B), and 2282 cells from 2  
1657 animals in (D).

1658 (E) Immunofluorescent staining for SOX2 and TUJ1 on head sections of E10.5  
1659 *Kdm2b*<sup>CreERT2/+</sup>;*Ai14* embryo. Boxed areas are enlarged at the bottom-right corners.

1660 (F) Immunofluorescent staining for PAX6 (top) and TBR2 (bottom) on head sections of  
1661 E13.5 *Kdm2b*<sup>CreERT2/+</sup>;*Ai14* embryo. Tamoxifen (TAM, 100 mg/kg) was injected at E12.5.  
1662 Boxed areas are enlarged at the bottom-right corners.

1663 (G-H) Immunofluorescent staining for SATB2 and CTIP2 on coronal cortical sections of  
1664 P7 *Kdm2b*<sup>CreERT2/+</sup>;*Ai14* mouse brain. Boxed areas are enlarged at the bottom-right corners.

1665 Quantification of SATB2 or CTIP2 expression in tdTomato+ recombined cells (H). A total  
1666 of 373 cells were analyzed.

1667 In (B), (D), and (H), quantification data are shown as mean + SEM.

1668 LV, lateral ventricle; MB, midbrain. Scale bars, 50  $\mu$ m.

1669

1670 **Figure 2 - figure supplement 1. *LncKdm2b* maintains *Kdm2b* Transcription in *cis*.**

1671 **Related to Figure 2.**

1672 (A) Percentages of marker-expressing neuronal cells in adherent cultures derived from  
1673 E12.5 cortices.

1674 (B) RT-qPCR analysis of *LncKdm2b* and *Kdm2b* RNA levels in adherent cultures derived  
1675 from E12.5 cortices. The cultures were treated with indicated ASOs. The y-axis represents  
1676 relative expression normalized to *Gapdh*.

1677 (C) RT-qPCR analysis of *Zfp292* mRNA levels in Neuro-2a cells treated with indicated  
1678 *LncKdm2b* ASOs for three days. The y-axis represents relative expression normalized to  
1679 *Gapdh*.

1680 (D) Genotyping of NE-4C clones with *LncKdm2b*'s exon2 knocked out.

1681 (E) RT-qPCR analysis of *Zfp292* mRNA levels in NE-4C clones with *LncKdm2b*'s exon2  
1682 knocked out. The y-axis represents relative expression normalized to *Gapdh*.

1683 (F) RT-qPCR analysis for *LncKdm2b*, *Gapdh*, *Actb*, *Xist*, and *Neat2* from cytoplasmic and  
1684 nuclear RNA fractions of primary E14.5 cortical neural progenitor cells (NPCs) cultured *in*  
1685 *vitro* for four days.

1686 (G) Fluorescent *in situ* hybridization of *LncKdm2b* on cortical NPCs treated with or without  
1687 RNase A. The nuclei were counter-stained with DAPI.

1688 (H) RT-qPCR analysis of *LncKdm2b* and *Kdm2b* mRNA levels in Neuro-2a cells  
1689 transfected with empty or *LncKdm2b*-expressing vectors for 48 hours. The y-axis  
1690 represents relative expression normalized to *Gapdh*.

1691 In (A), quantification data are shown as mean + SEM. In (B–C), (E-F), and (H)  
1692 quantification data are shown as mean + SD (n = 3 unless otherwise indicated). In (B) and  
1693 (H), statistical significance was determined using 2-tailed Student's t test. In (C) and (E),  
1694 statistical significance was determined using 1-way ANOVA followed by the Turkey's post  
1695 hoc test. \*  $p < 0.05$ , \*\*  $p < 0.01$ , \*\*\*  $p < 0.001$ , "NS" indicates no significance.

1696

1697 **Figure 3 - figure supplement 1. *LncKdm2b* maintains *Kdm2b* Transcription in *cis*.**

1698 **Related to Figure 3.**

1699 (A) Luciferase activities in experiments where indicated vectors were transfected into  
1700 HEK293T cells for 24 hours. 'Forward' and 'Reverse' indicate directions same as or  
1701 opposite of *Kdm2b*'s transcription orientation.

1702 (B) Genotyping of NE-4C cells with the T5 region knocked out.

1703 (C) RT-qPCR analysis of *Zfp292* mRNA levels in NE-4C clones with the T5 region knocked  
1704 out. The y-axis represents relative expression normalized to *Gapdh*.

1705 (D) Genotyping of cortical cells subjected to Cas9-mediated knockout of the T5 region.

1706 In (A) and (C), quantification data are shown as mean + SD (n = 3 unless otherwise  
1707 indicated). In (A) and (C), statistical significance was determined using 1-way ANOVA  
1708 followed by the Turkey's post hoc test. \*  $p < 0.05$ , \*\*  $p < 0.01$ , \*\*\*  $p < 0.001$ , "NS" indicates no  
1709 significance.

1710

1711 **Figure 4 - figure supplement 1. Characterization of *LncKdm2b*-Associated Proteins.**

1712 **Related to Figure 4.**

1713 (A) The illustration describing the Gal4- $\lambda$ N/BoxB RNA tethering system.

1714 (B-D) Relative luciferase activities in experiments where Neuro-2a cells were transfected  
1715 with plasmids expressing BoxB-tagged *LacZ*, full-length *LncKdm2b*, 5' *LncKdm2b*, or 3'  
1716 *LncKdm2b* along with Gal4- $\lambda$ N and 5 $\times$ UAS-TK-Luciferase-expressing plasmids for 24

1717 hours.

1718 (E) RT-qPCR analysis of *Kdm2b* mRNA levels in Neuro-2a cells treated for three days with  
1719 scramble siRNA (siNC) or siRNA targeting indicated molecules. The y-axis represents  
1720 relative expression normalized to *Gapdh*.

1721 (F) Fluorescent *in situ* hybridization of *LncKdm2b* on cortical NPCs followed by co-  
1722 staining of hnRNPAB and DAPI.

1723 (G) RNA secondary structure prediction by *RNAfold* showed two putative stem-loop  
1724 structures.

1725 (H) ChIP-qPCR analysis of indicated primer sets enriched by anti-hnRNPAB antibodies  
1726 in Neuro-2a cells. The y-axis shows fold enrichment normalized to the IgG control.

1727 In (B–E) and (H), quantification data are shown as mean + SD (n = 3 unless otherwise  
1728 indicated). In (B–E), statistical significance was determined using 1-way ANOVA  
1729 followed by the Turkey’s post hoc test. In (H), statistical significance was determined  
1730 using 2-tailed Student’s t test. \*  $p < 0.05$ , \*\*  $p < 0.01$ , \*\*\*  $p < 0.001$ , “NS” indicates no  
1731 significance.

1732

1733 **Figure 5 - figure supplement 1. *Kdm2b* promotes Cortical Neurogenesis. Related to**  
1734 **Figure 5.**

1735 (A) Representative immunoblots of HEK293T cells transfected with empty vector or  
1736 KDM2B-expressing vector for two days using antibodies against KDM2B and ACTIN.

1737 (B) Immunoblotting of E15.5 embryonic cortices with indicated genotypes using antibodies  
1738 against KDM2B and  $\beta$ -TUBULIN.

1739 (C-D) Quantification of relative location (C) and percentiles (D) of NEUROD2+ transduced  
1740 cells in scramble or KDM2B shRNA electroporated sections. Three embryos each.

1741 (E-F) E13.5 mouse cortices were electroporated with indicated combination of vectors,  
1742 with transduced cells labeled with EGFP. Embryos were sacrificed at E16.5 for  
1743 immunofluorescent analysis. Representative VZ/SVZ images of sections immunostained  
1744 with PAX6 (E) and quantification of PAX6+ transduced cells (F) were shown. Three  
1745 embryos in control and shKDM2B, five embryos in shKDM2B plus KDM2B. Scale bars, 50  
1746  $\mu\text{m}$ .

1747 (G) Quantification of Cleaved Caspase3+ transduced cells in scramble or KDM2B shRNA  
1748 electroporated sections. Three embryos each.

1749 In (C-D) and (F-G), quantification data are shown as mean + SEM. In (C-D) and (G),  
1750 statistical significance was determined using 2-tailed Student's t test. In (F), statistical  
1751 significance was determined using 1-way ANOVA followed by the Turkey's post hoc test.  
1752 \*  $p < 0.05$ , \*\*  $p < 0.01$ , \*\*\*  $p < 0.001$ , "NS" indicates no significance.

1753 VZ, ventricular zone; SVZ, subventricular zone; IZ, intermediate zone; CP, cortical plate.

1754

1755 **Figure 6 - figure supplement 1. KDM2B promotes cortical neurogenesis**  
1756 **independent of the Polycomb Repressive Complex 1 (PRC1). Related to Figure 6.**

1757 (A) Representative immunoblotting of HEK293T cells transfected with indicated vectors  
1758 for two days using antibodies against KDM2B and  $\beta$ -TUBULIN.

1759 (B) Representative immunoblotting of HEK293T cells transfected with empty and FLAG-  
1760 RING1B(I53A)-expressing vectors for two days using antibodies against FLAG and ACTIN.

1761 (C-E) E13.5 mouse cortices were electroporated with empty or RING1B(I53A)-expressing  
1762 vector, along with EGFP-expressing vectors to label transduced cells. Embryos were  
1763 sacrificed at E16.5 for PAX6 immunofluorescent analysis (C). The relative location of  
1764 EGFP+ cells (D) and percentiles of PAX6+ transduced cells (E) were quantified. Six  
1765 embryos in control, and four embryos in RING1B(I53A). Scale bars, 50  $\mu\text{m}$ .



1766 (F) Schematic diagram showing generation of *Kdm2b* knockout mice using CRISPR/Cas9  
1767 mediated gene editing.

1768 (G) Representative immunoblotting of E9.5 mouse embryos with indicated genotypes  
1769 using antibodies against H2AK119ub1, H3K27me3, H3K36me2, and H3.

1770 In (D–E), quantification data are shown as mean + SEM. In (D–E), statistical significance  
1771 was determined using 2-tailed Student's t test. \*  $p < 0.05$ , \*\*  $p < 0.01$ , \*\*\*  $p < 0.001$ , "NS"  
1772 indicates no significance.

1773 VZ, ventricular zone; SVZ, subventricular zone; IZ, intermediate zone; CP, cortical plate.

1774

1775 **Figure 7 - figure supplement 1. *LncKdm2b* Maintains Mouse Cortical Neurogenesis**  
1776 **through KDM2B. Related to Figure 7.**

1777 (A–C) E13.5 mouse cortices were electroporated with indicated siRNAs, with transduced  
1778 cells labeled with EGFP. Embryos were sacrificed at E16.5 for PAX6 immunofluorescent  
1779 stainings (A). The relative location of EGFP+ cells (B) and percentiles of PAX6+  
1780 transduced cells (C) were quantified. Three embryos in control (siNC), five embryos in  
1781 sihnRNPA2B1. Scale bars, 50  $\mu\text{m}$ .

1782 (D–E) E13.5 mouse cortices were electroporated with empty or *LncKdm2b*-expressing  
1783 vector, along with mCherry-expressing vector to label transduced cells. Embryos were  
1784 sacrificed at E15.5 followed by DAPI staining of coronal sections (D). The locations of  
1785 mCherry+ cells were quantified (E). Seven embryos each. Scale bars, 50  $\mu\text{m}$ .

1786 In (B–C) and (E), quantification data are shown as mean + SEM. In (B–E), statistical  
1787 significance was determined using 2-tailed Student's t test. \*  $p < 0.05$ , \*\*  $p < 0.01$ , \*\*\*  
1788  $p < 0.001$ , "NS" indicates no significance.

1789 VZ, ventricular zone; SVZ, subventricular zone; IZ, intermediate zone; CP, cortical plate.

1790

1791 **Additional files**

1792 **Supplementary file 1**

1793 Supplementary tables.

1794 (1) Table 1. Divergent lncRNAs identified in this study.

1795 (2) Table 2. Significantly-enriched proteins in *LncKdm2b*-precipitating extracts compared  
1796 to the antisense-*LncKdm2b*.

1797 (3) Table 3. Statistical analyses of electroporated cortices.

1798 (4) Table 4. Sequences for all primers used in this study.

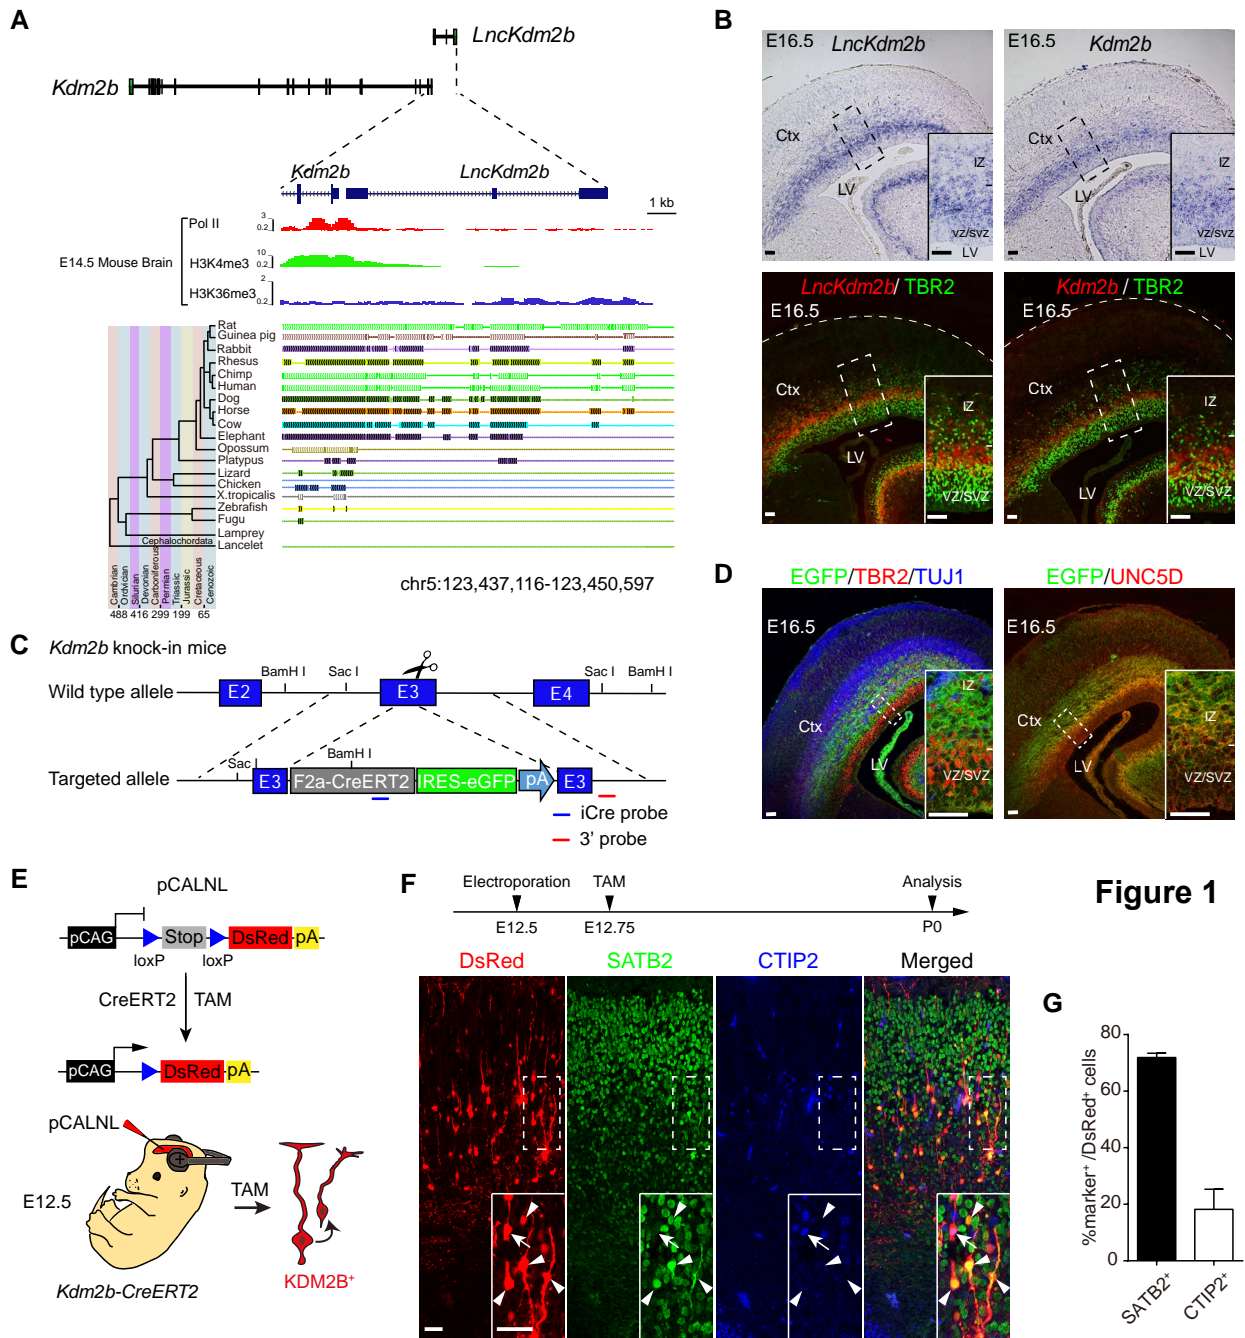

**Figure 1**

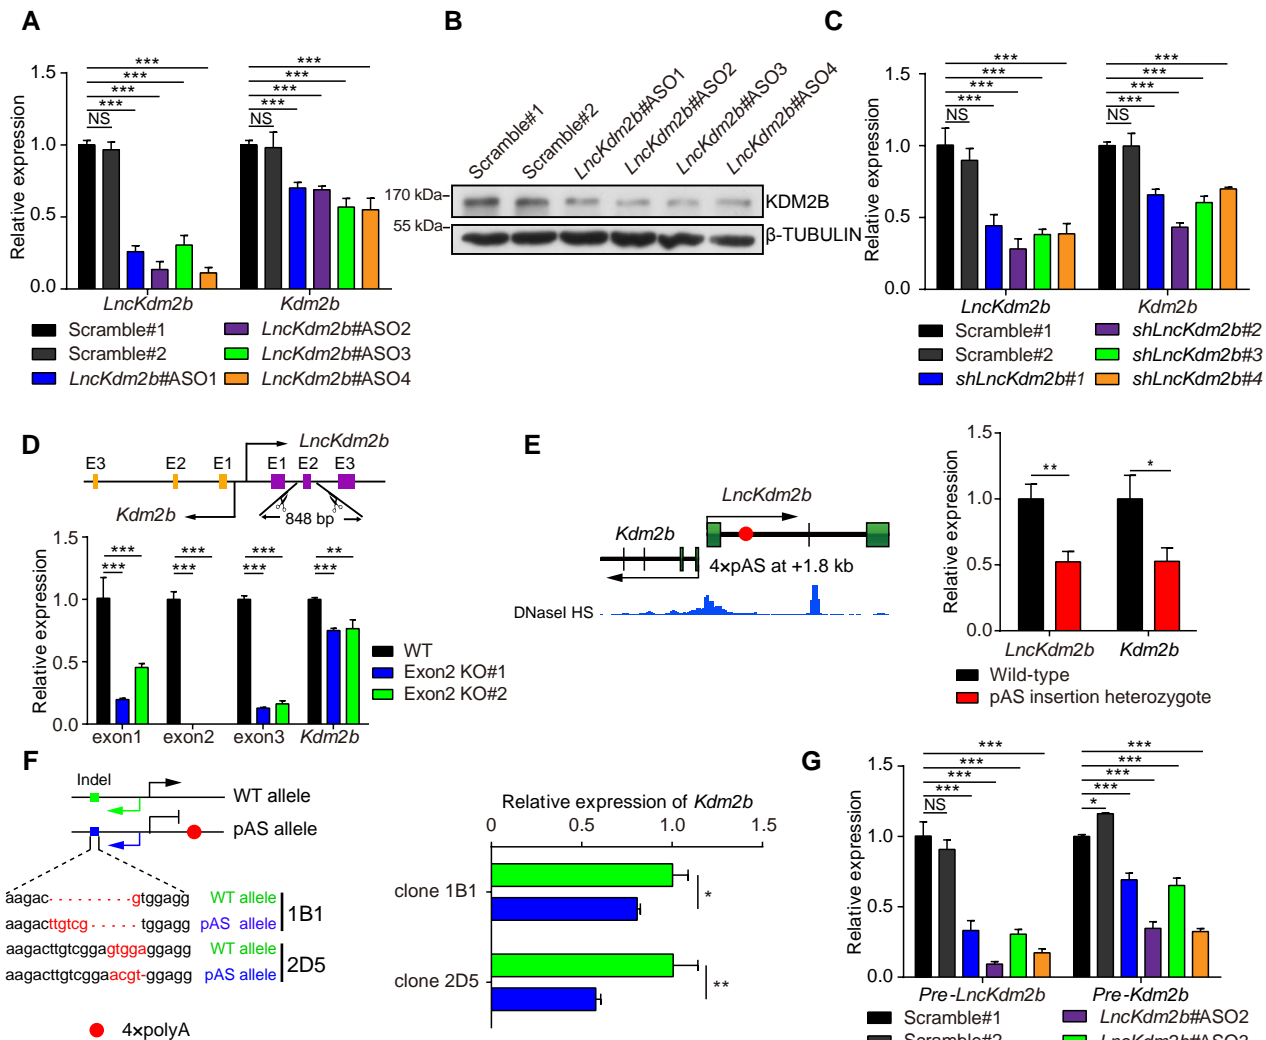

**Figure 2**

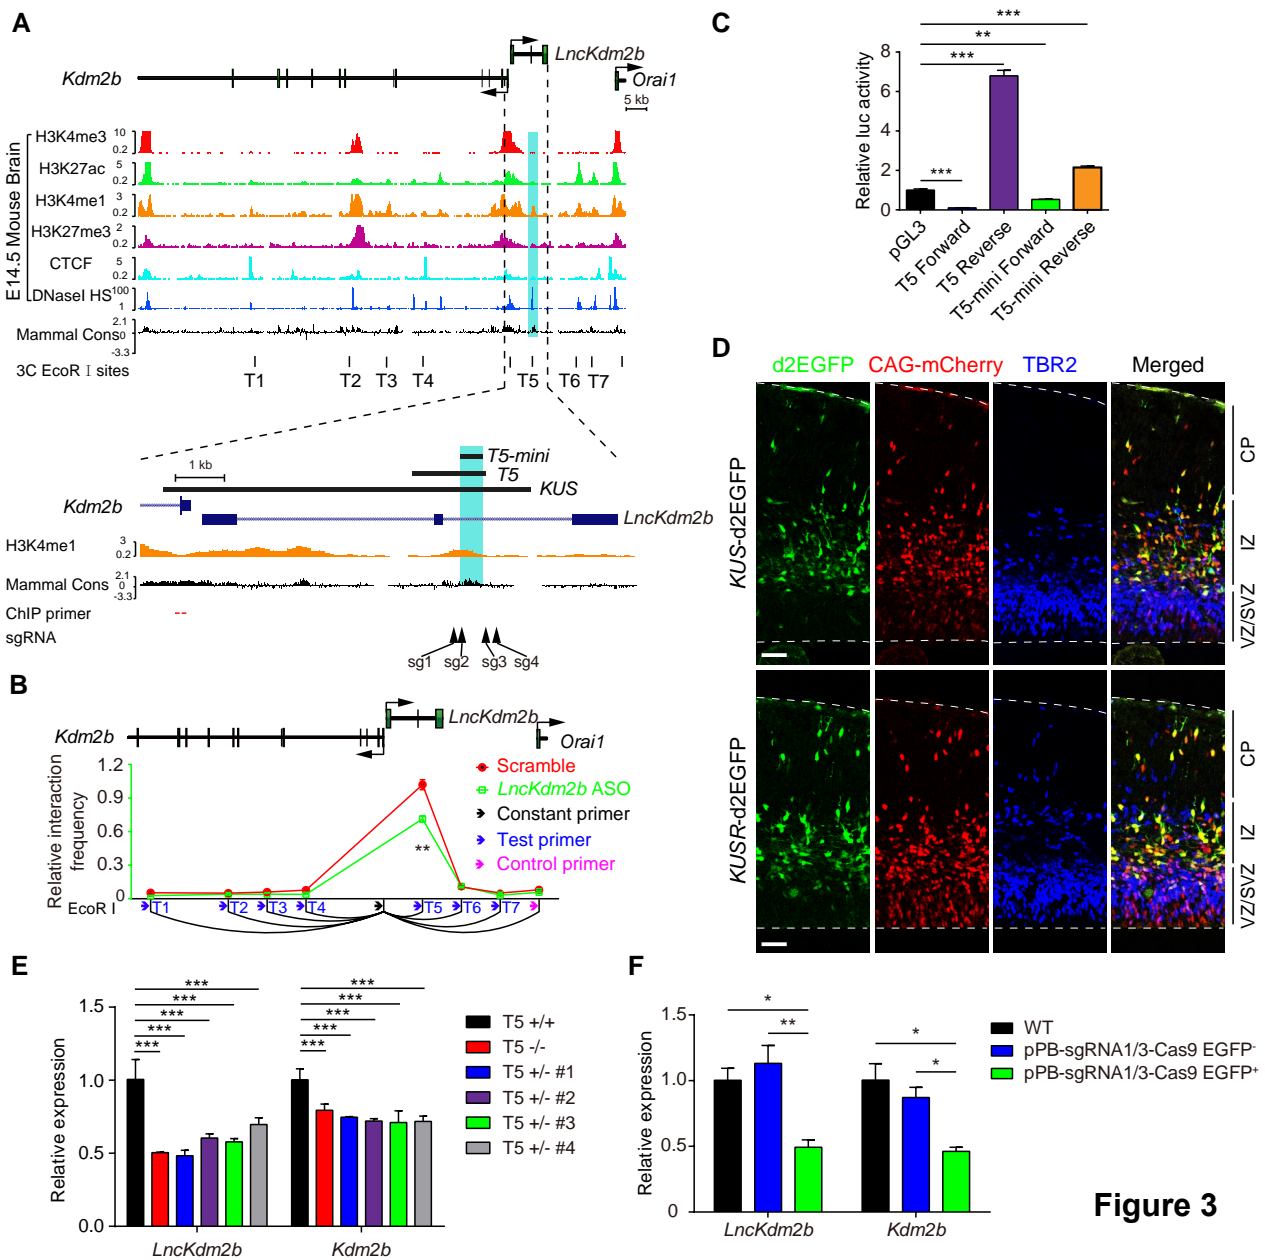

**Figure 3**

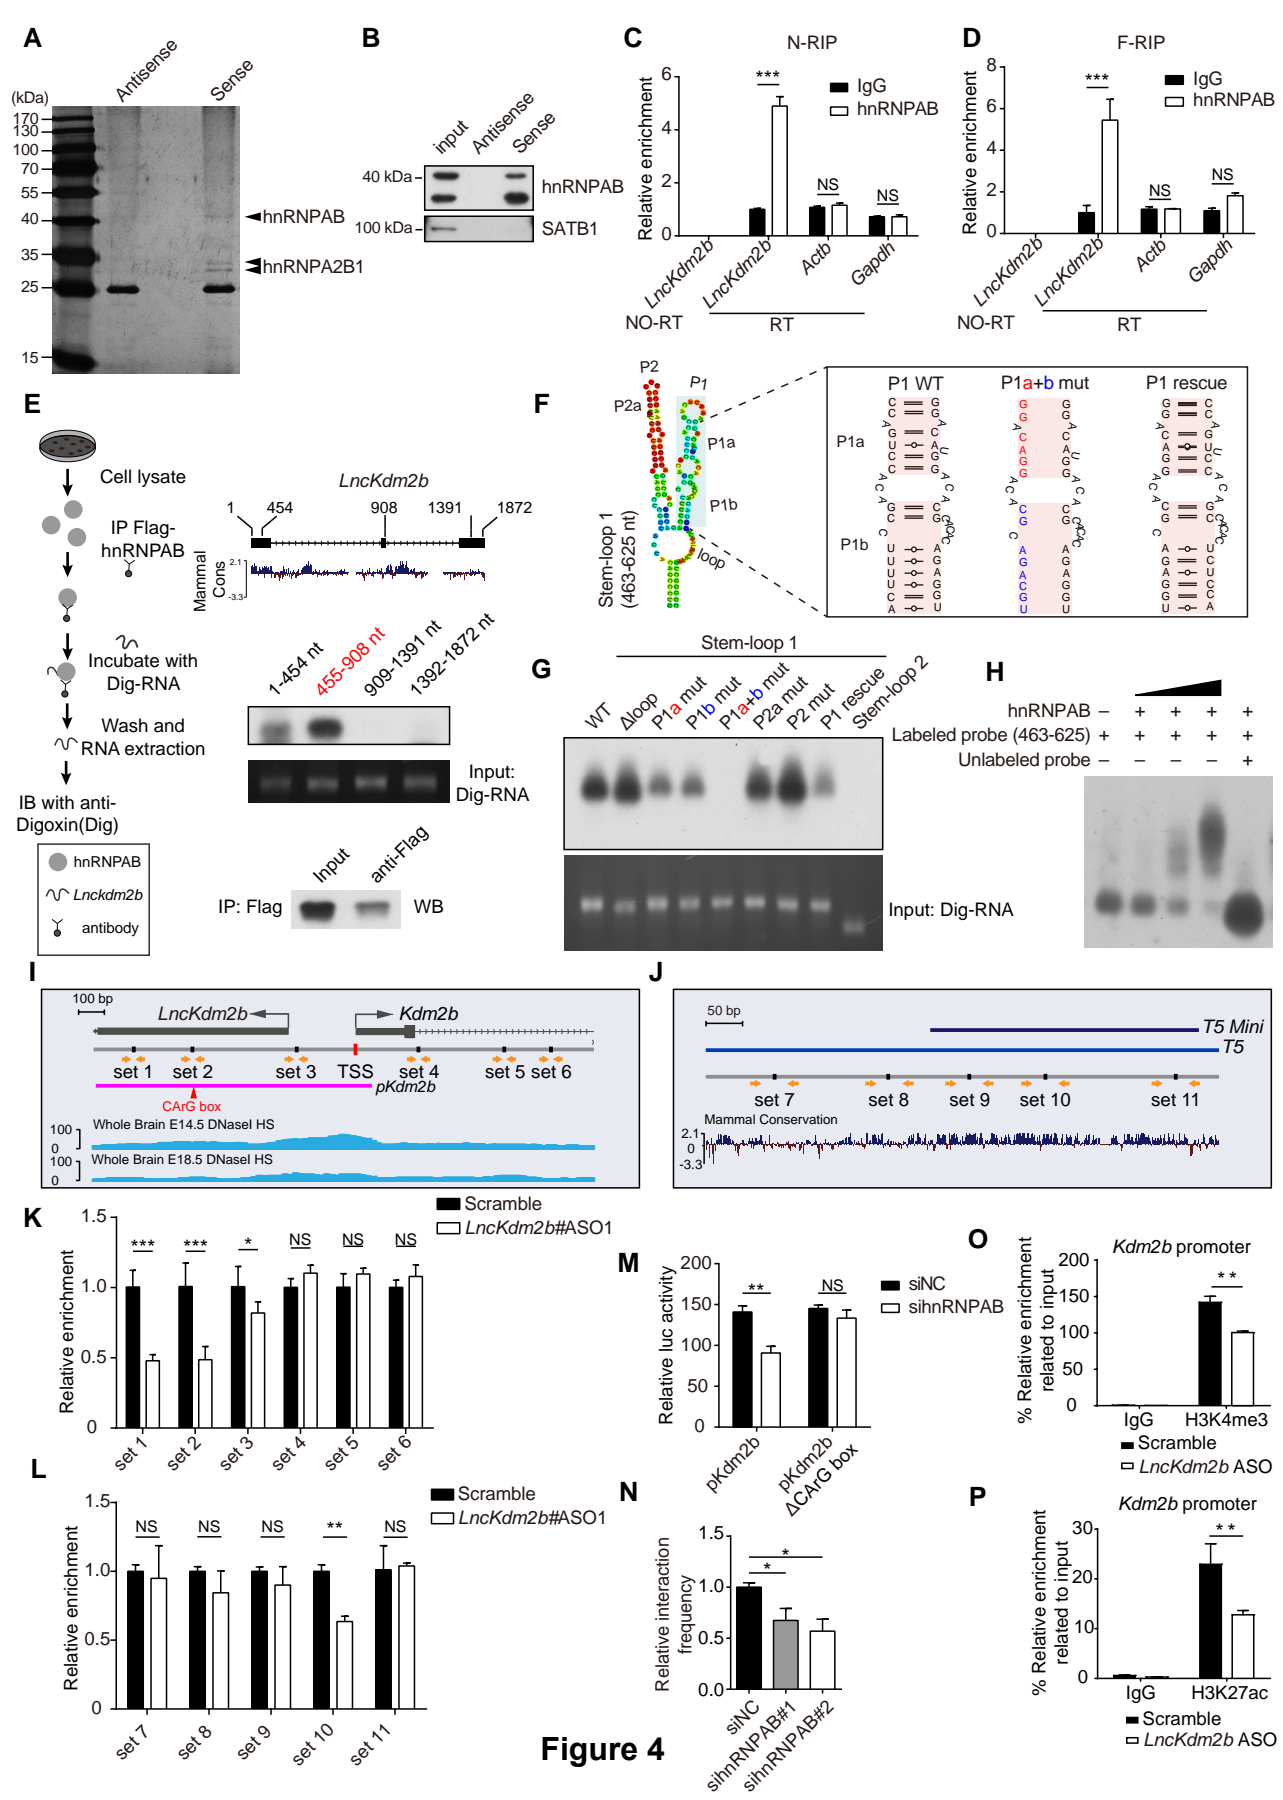

**Figure 4**



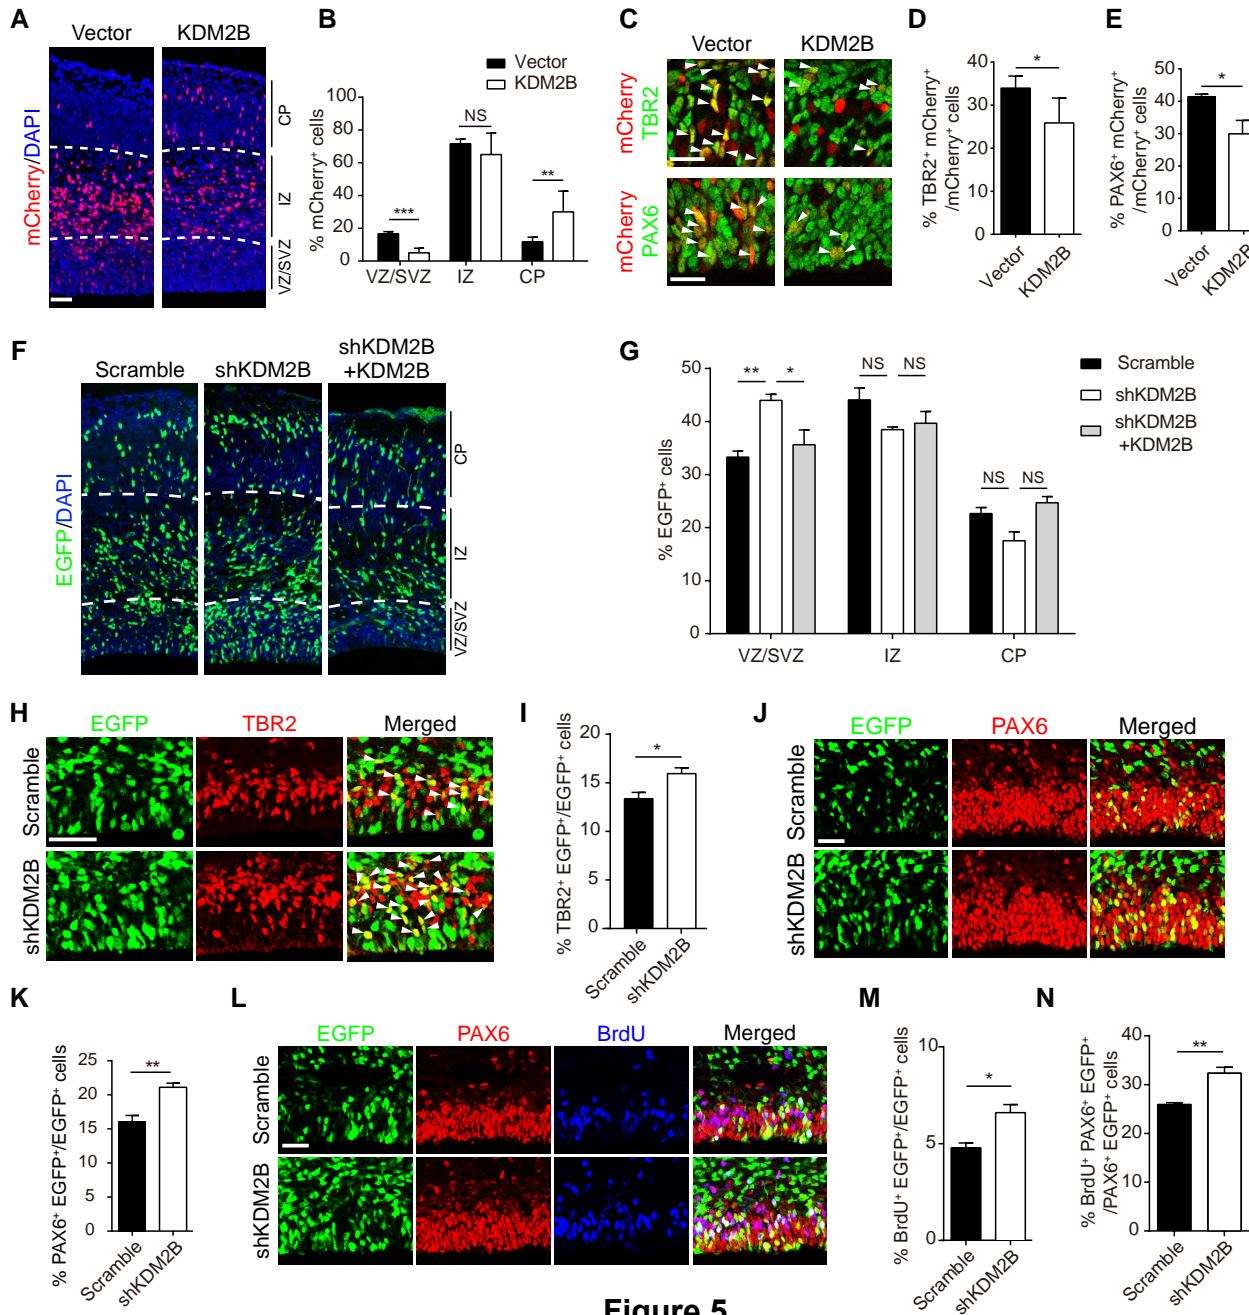

**Figure 5**

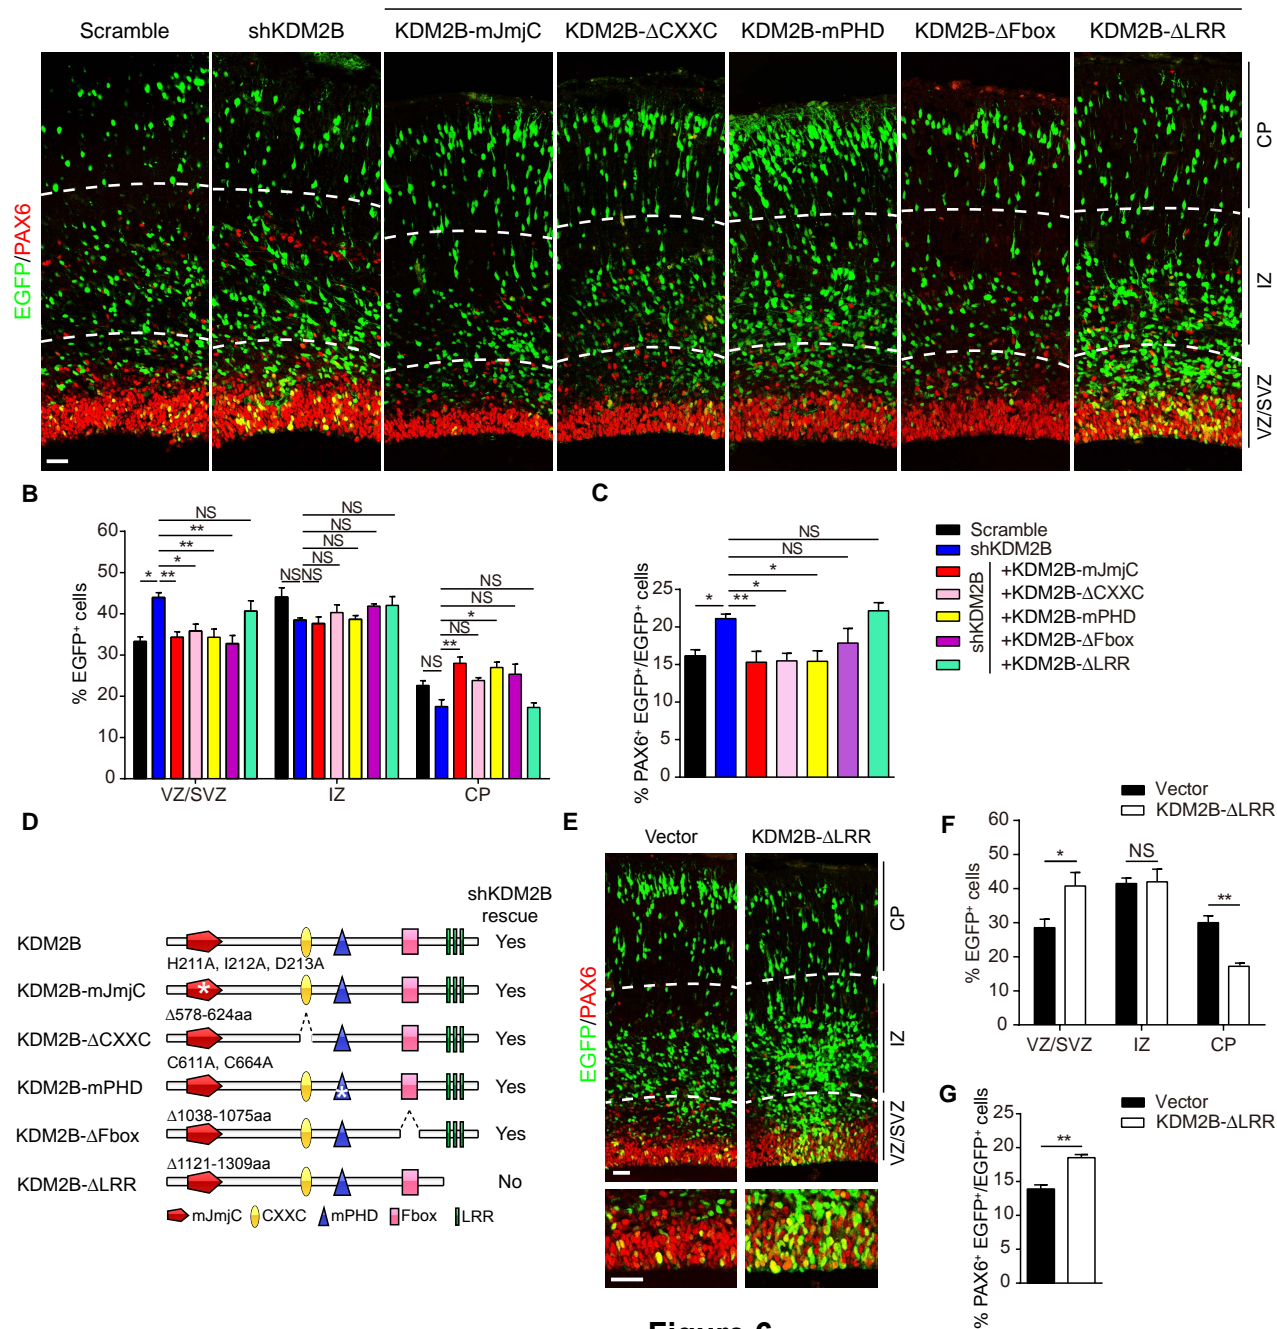

Figure 6



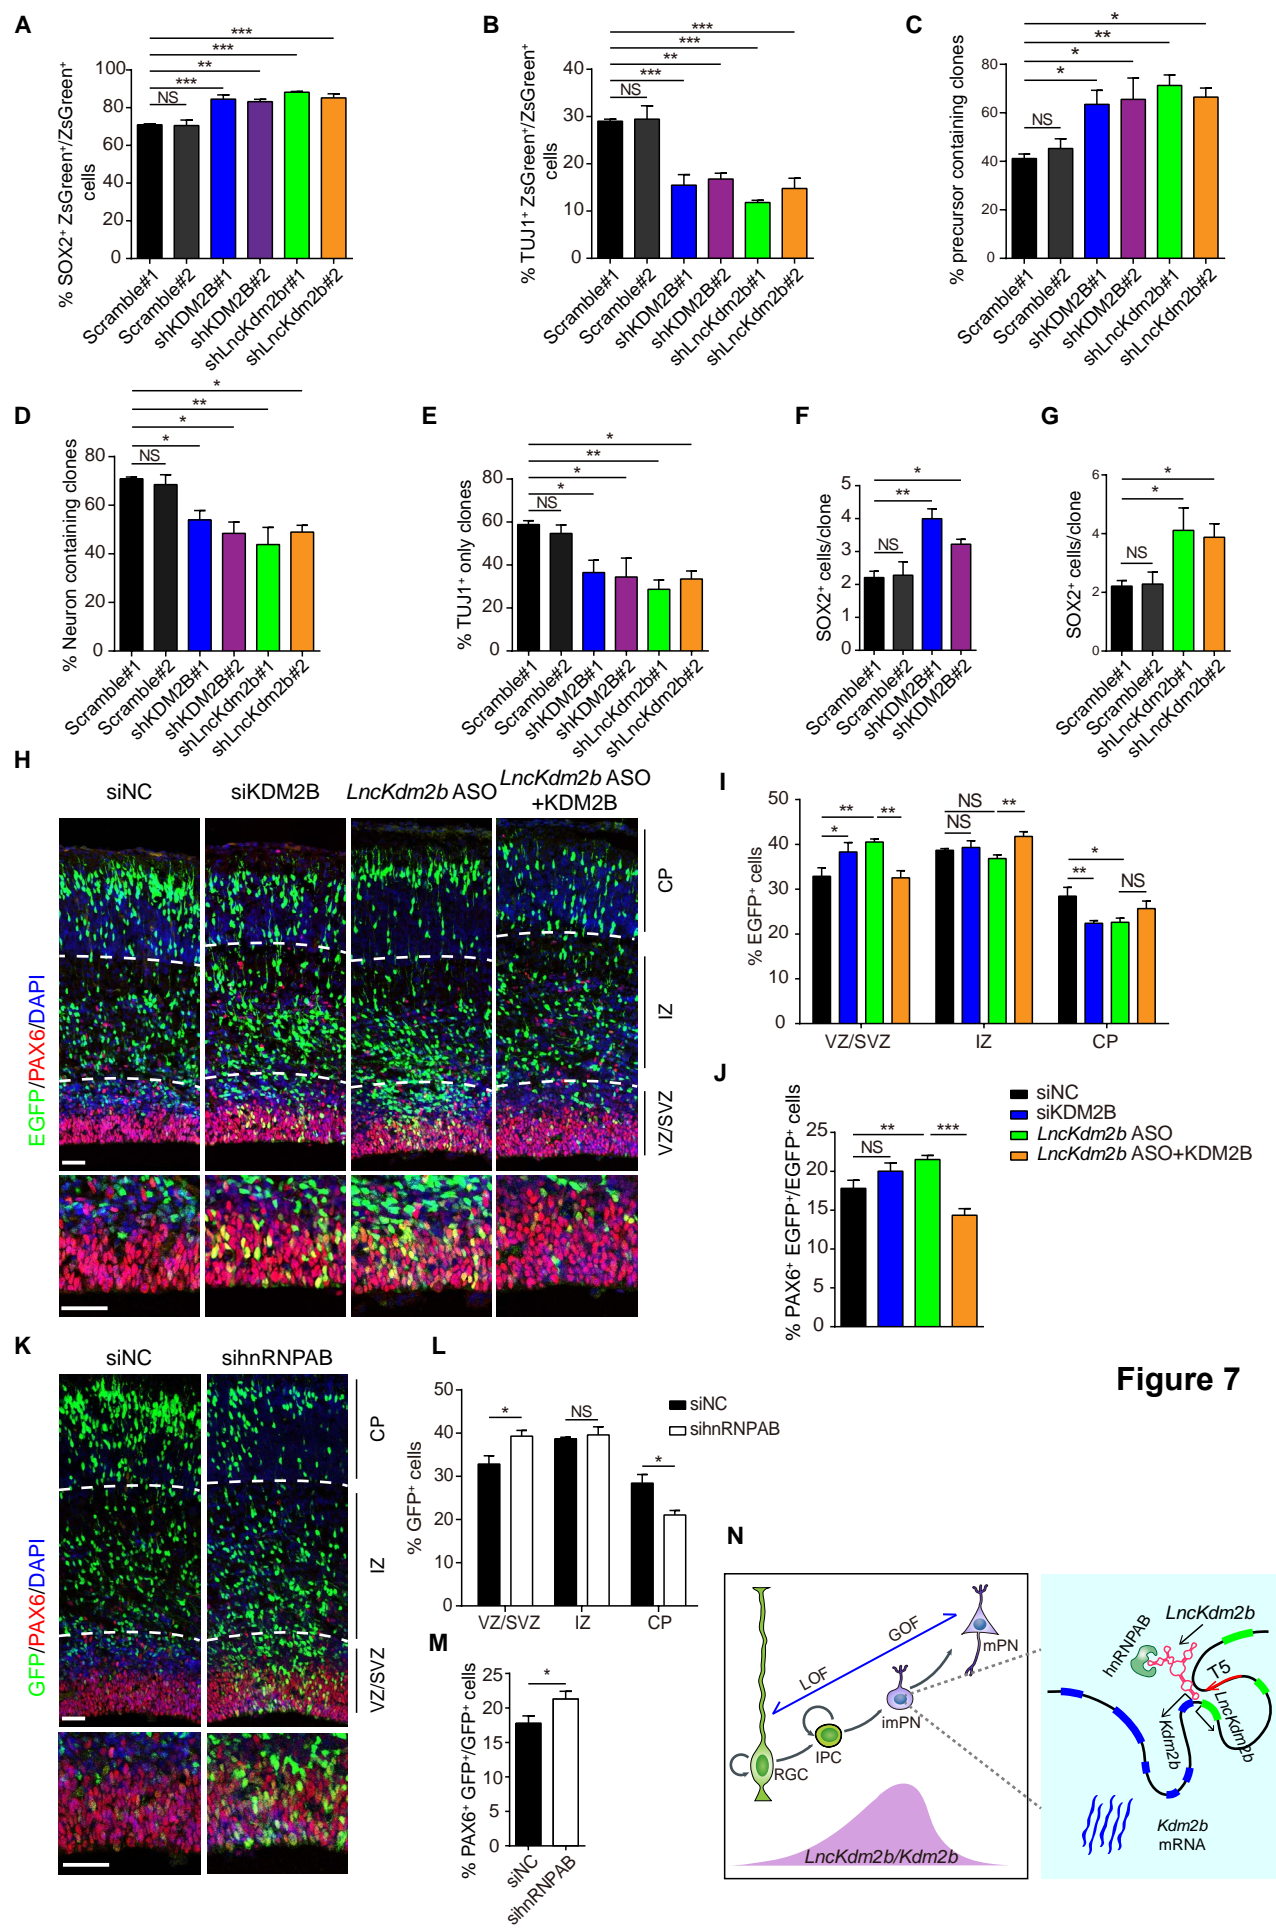

**Figure 7**

# Figure 1 - figure supplement 1

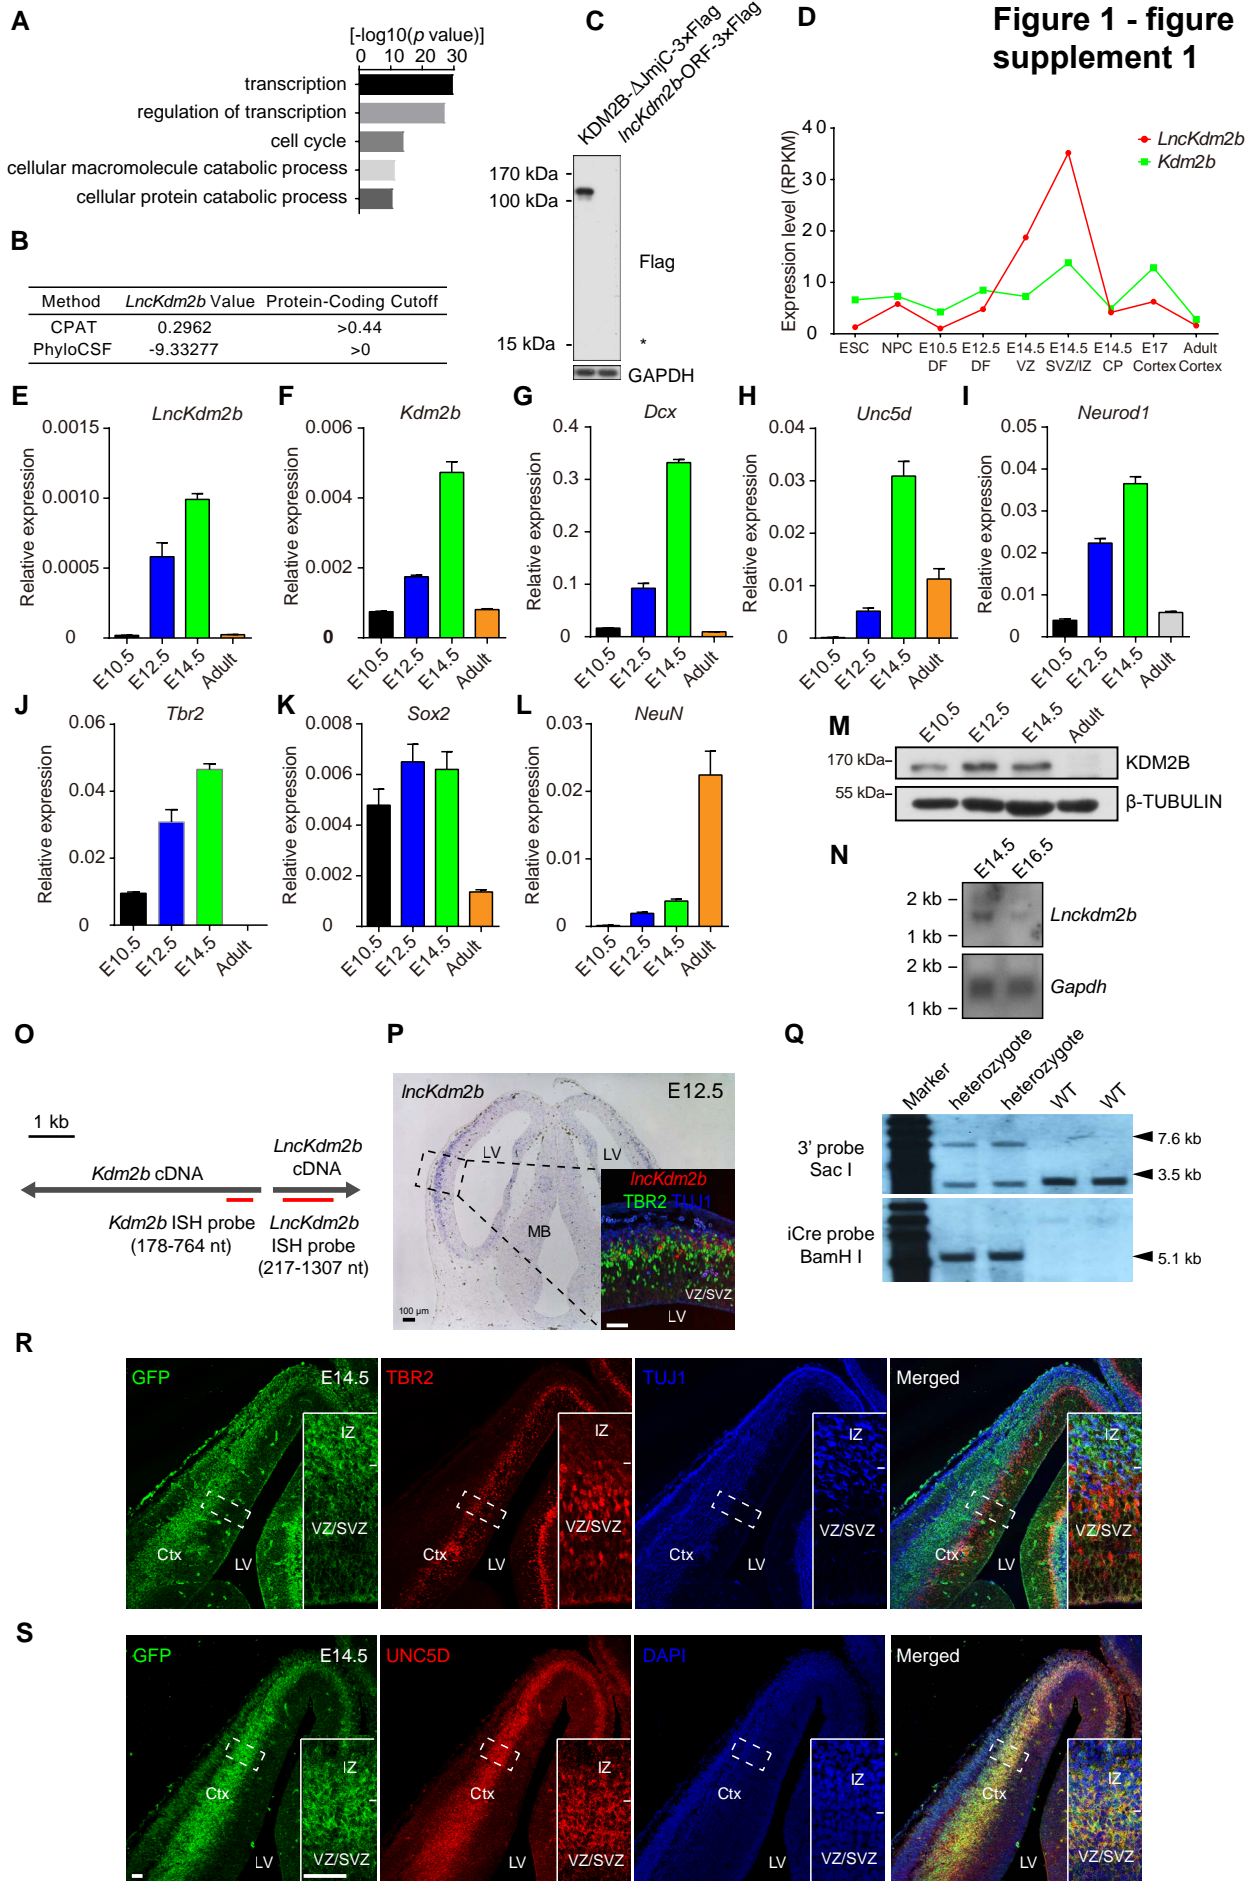



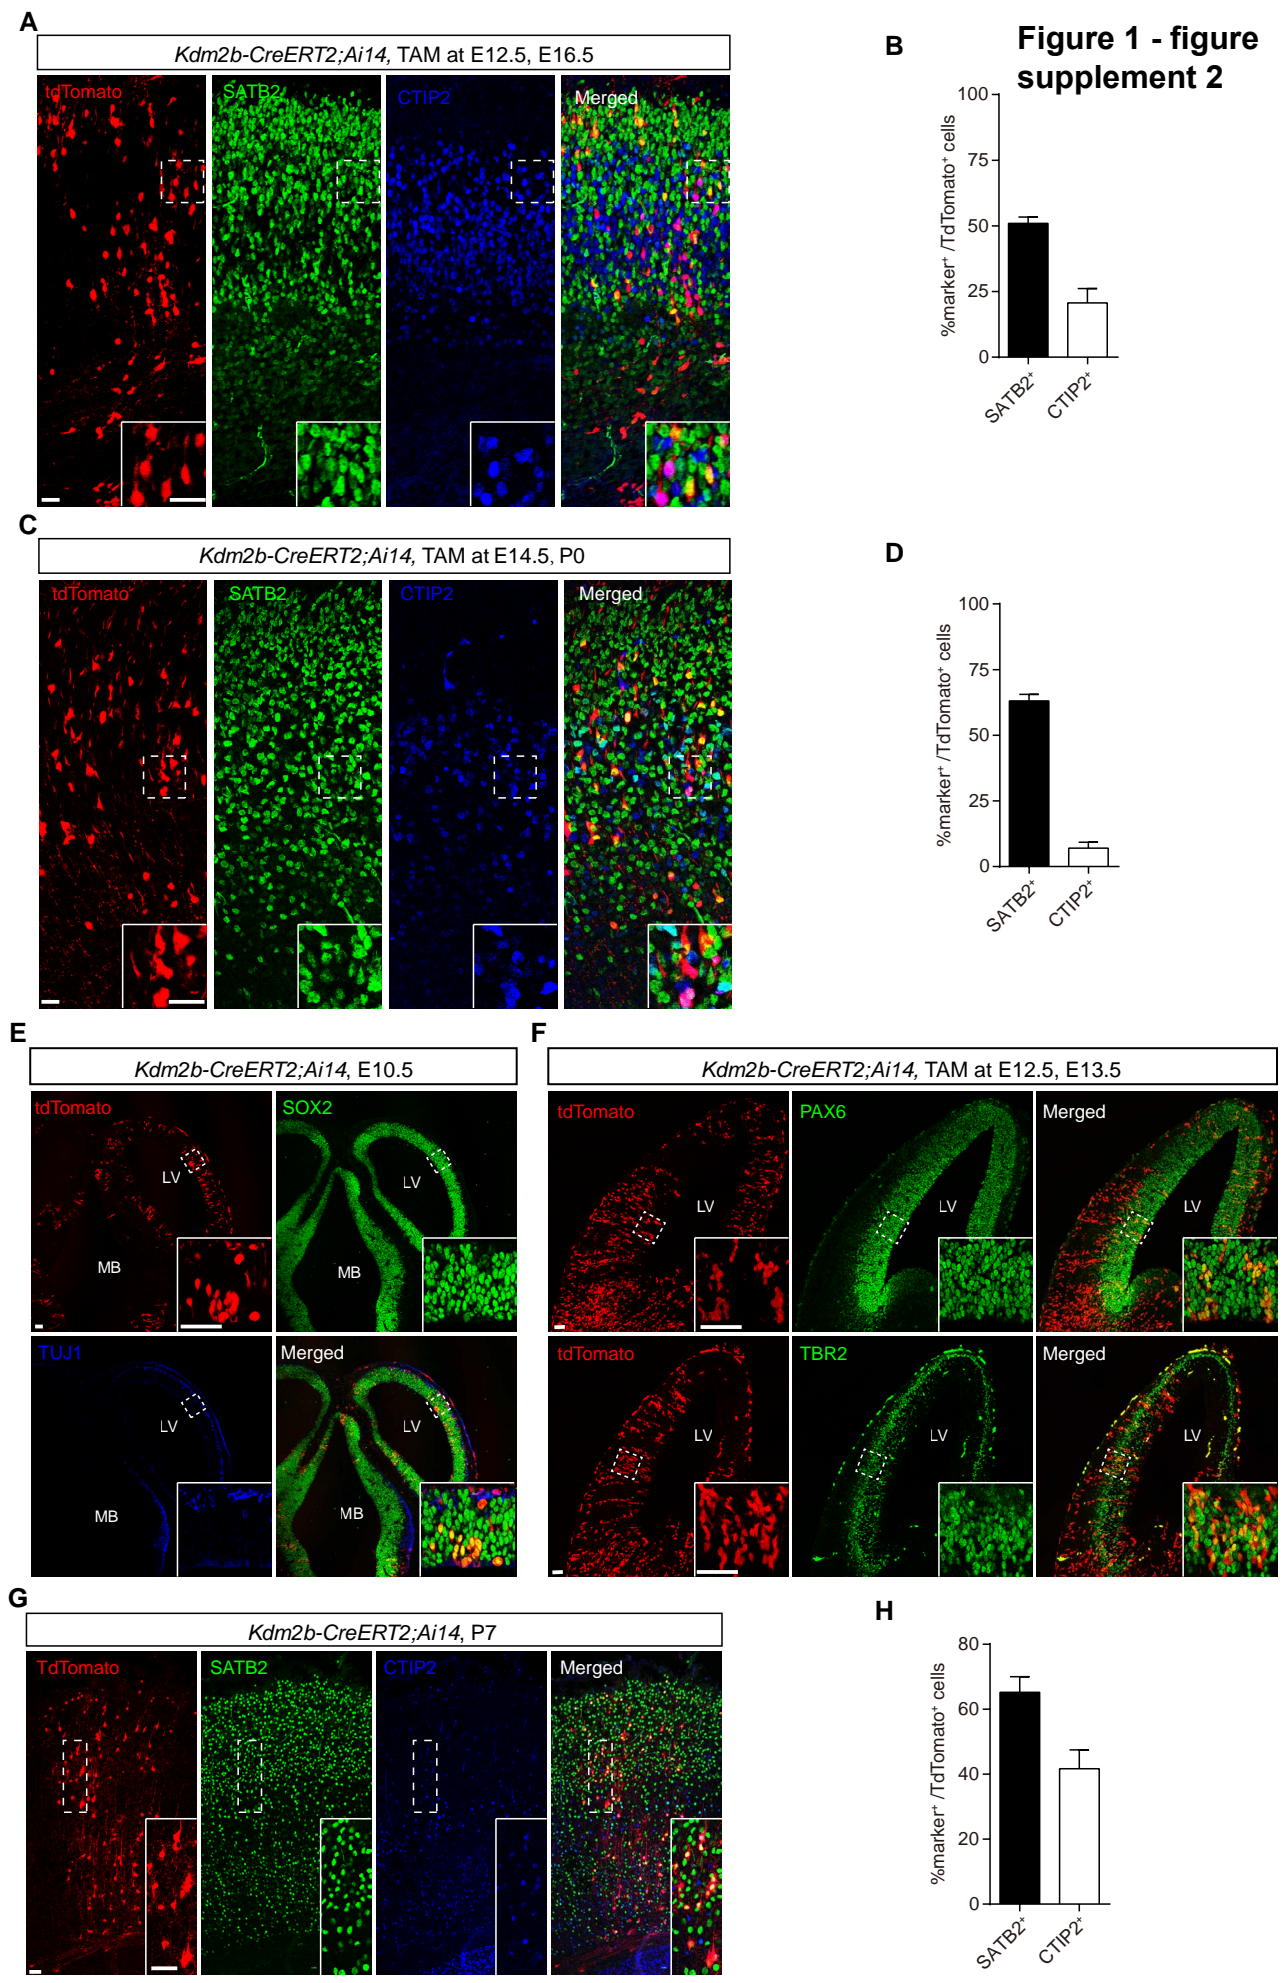

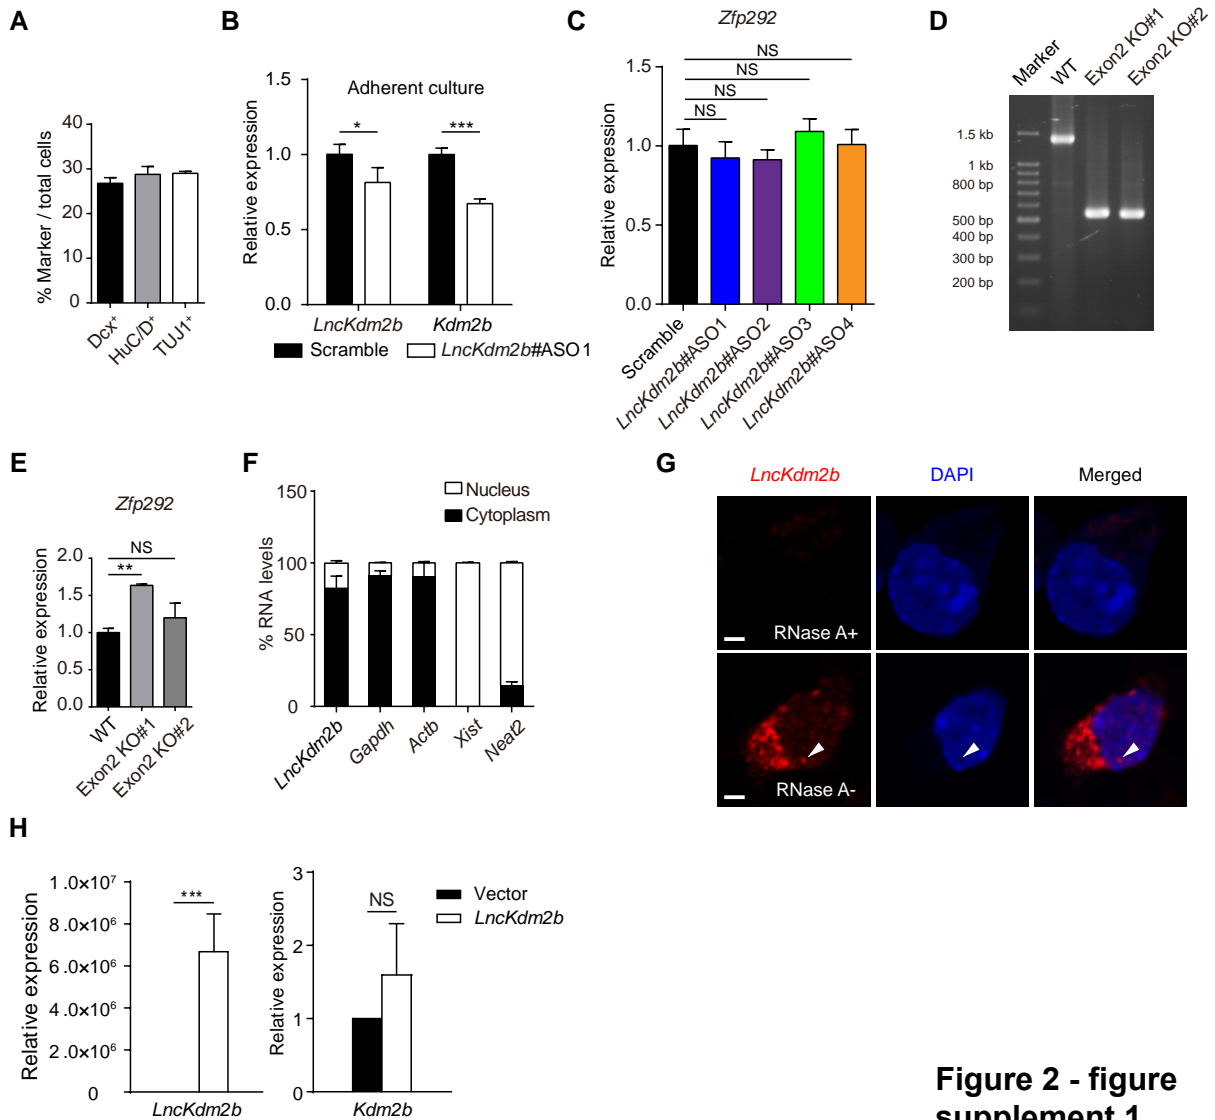

**Figure 2 - figure supplement 1**

**A**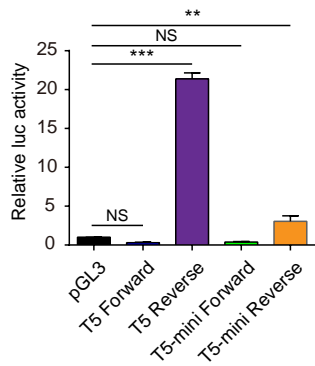**B**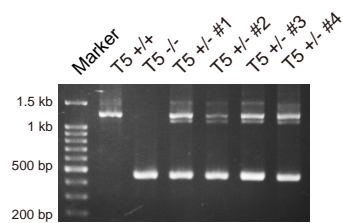**C**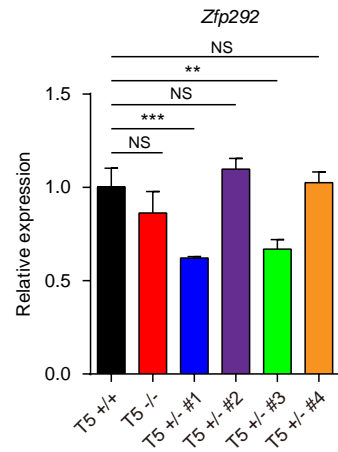**D**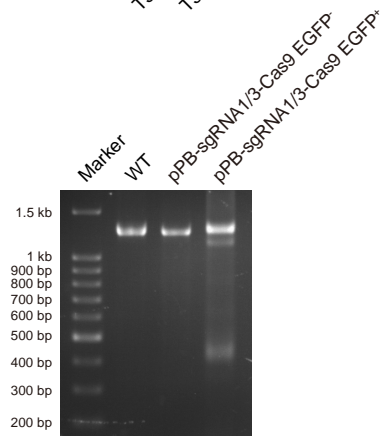

**Figure 3 - figure supplement 1**

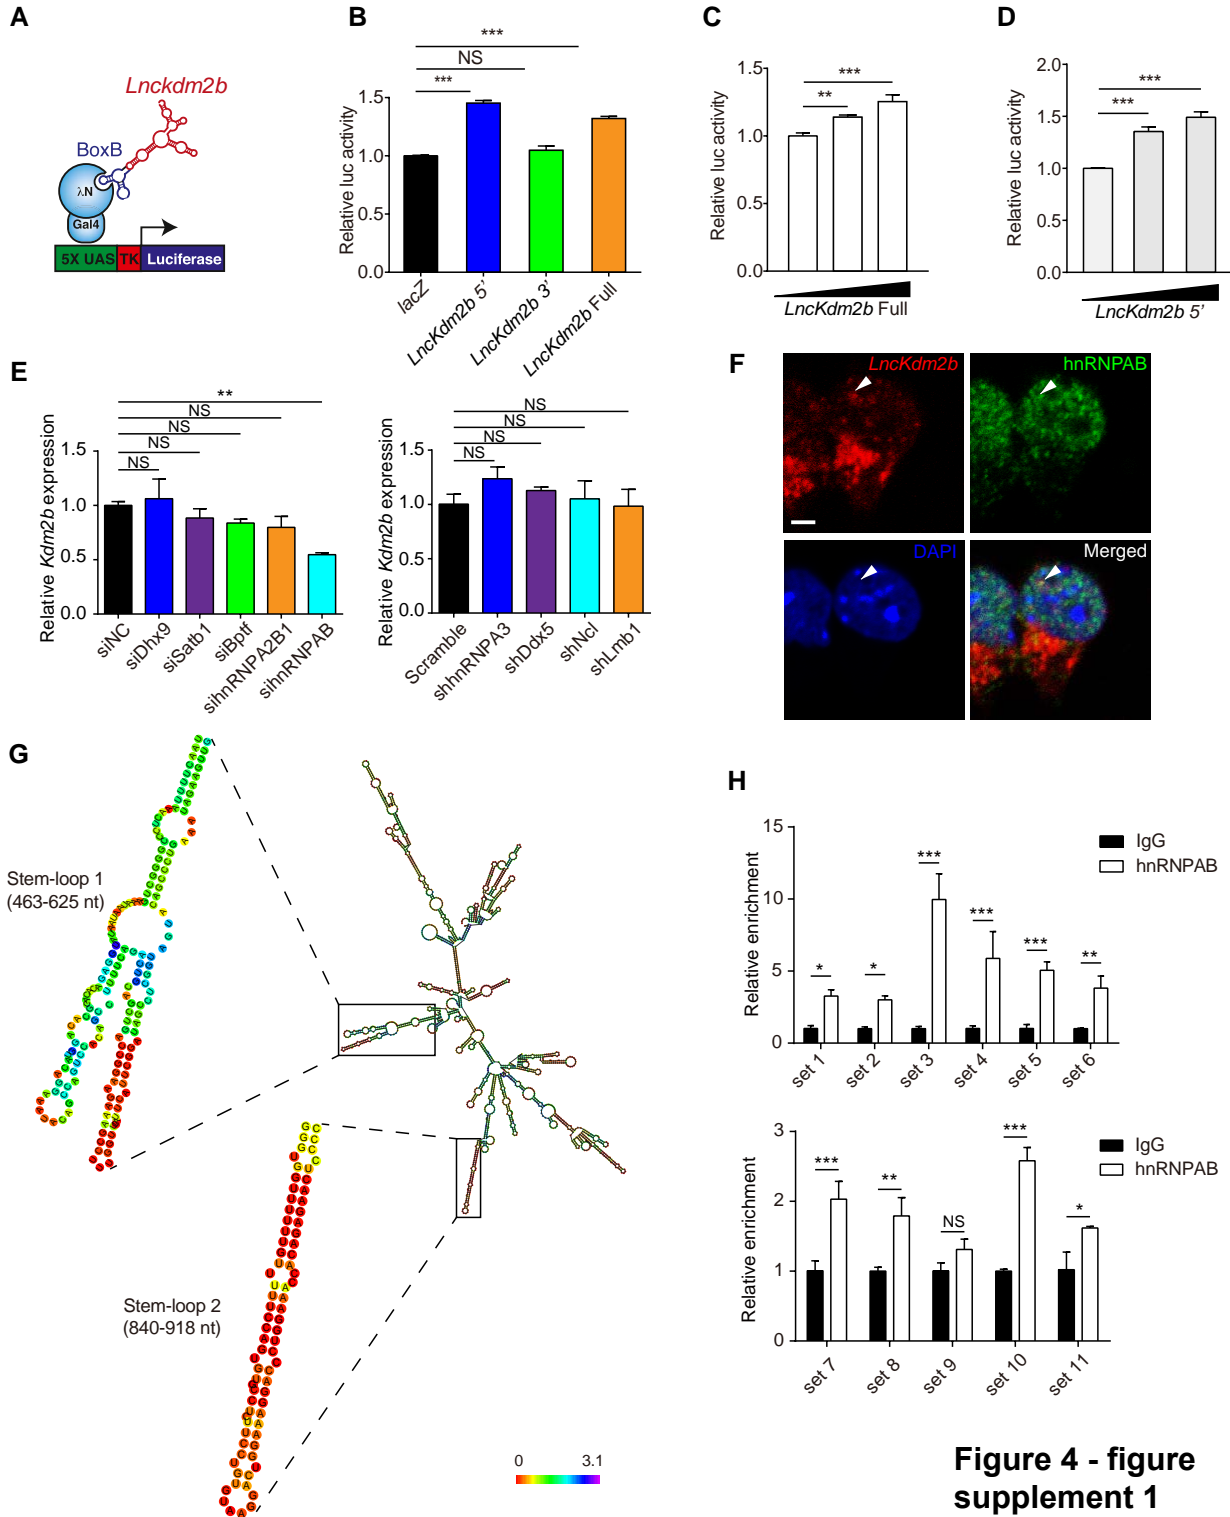

**Figure 4 - figure supplement 1**

**A**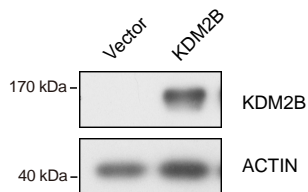**B**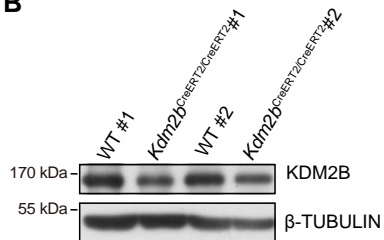**C**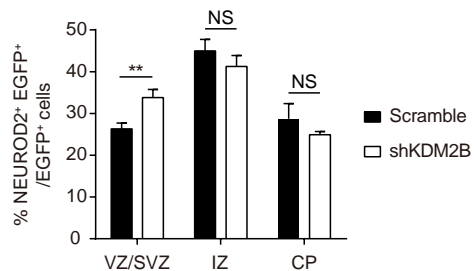**D**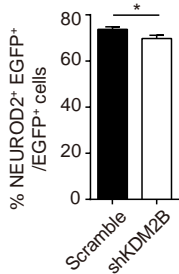**E**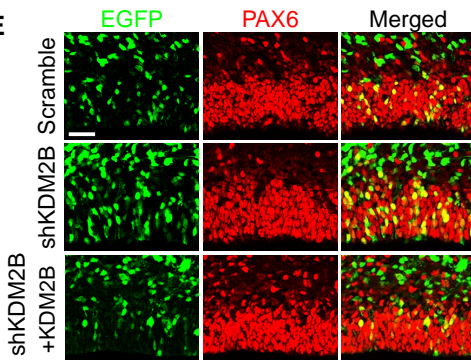**F**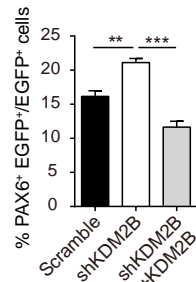**G**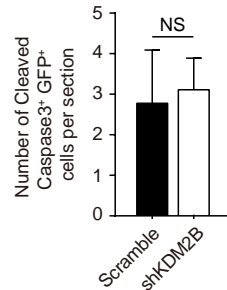

**Figure 5 - figure supplement 1**



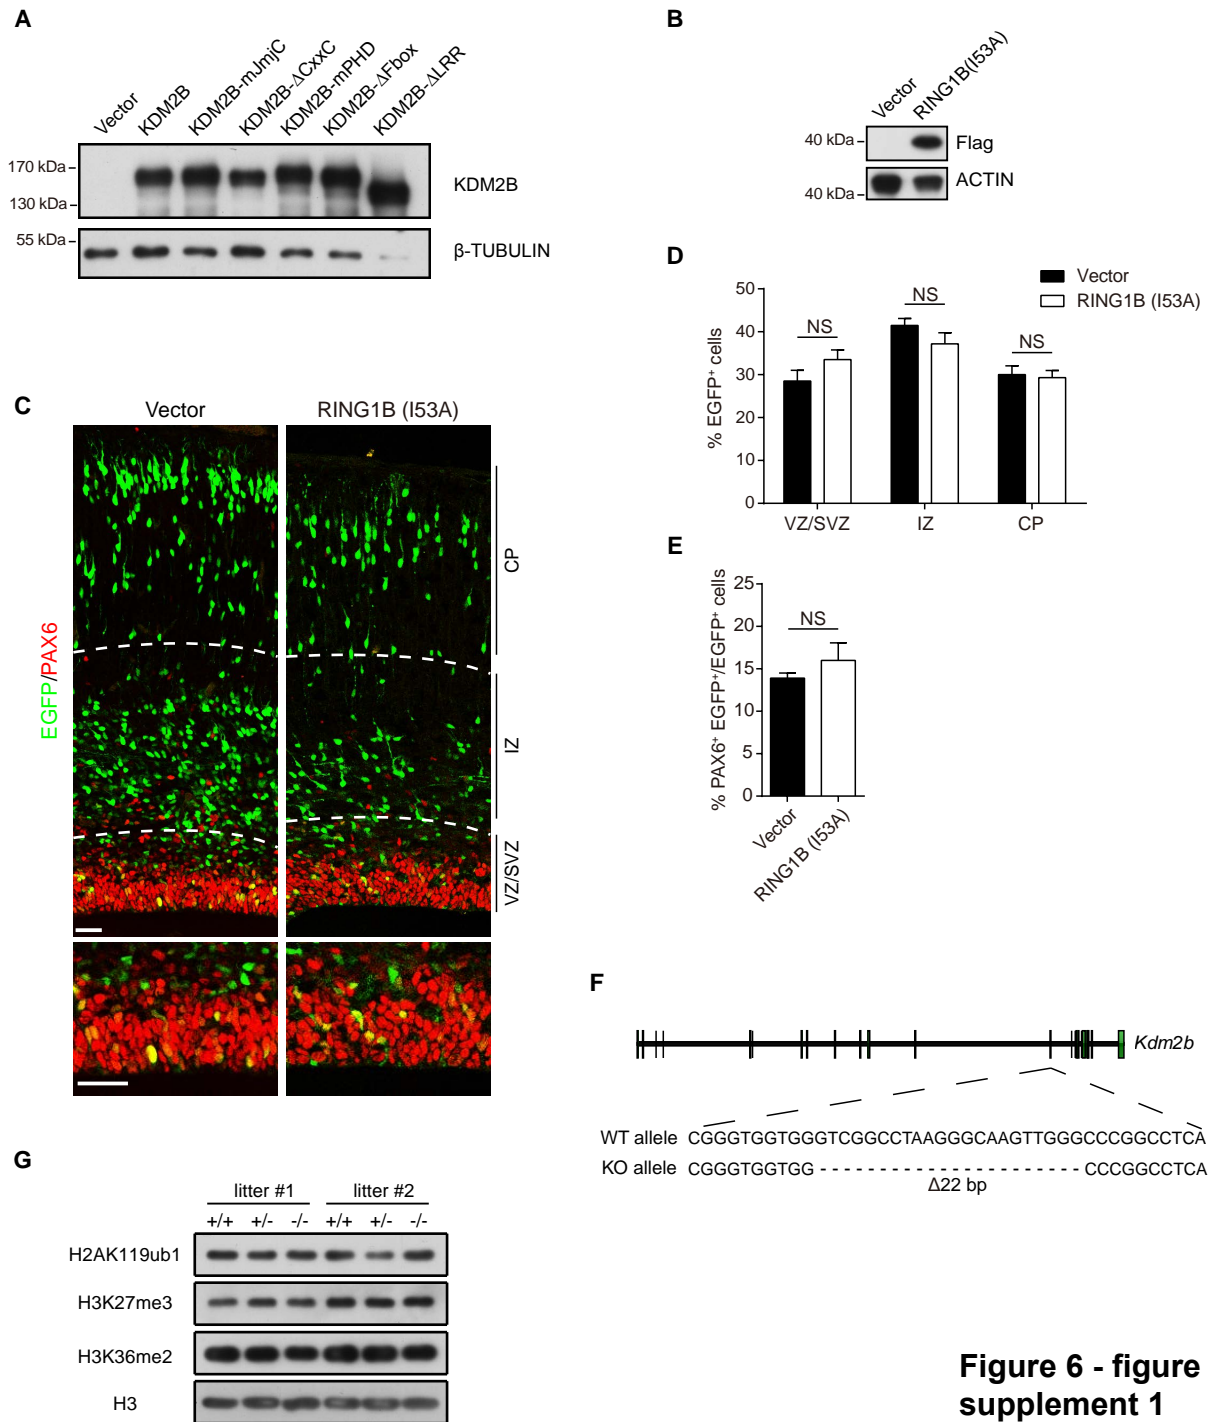

**Figure 6 - figure supplement 1**

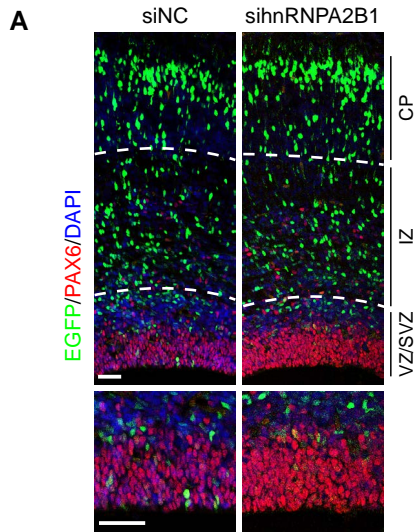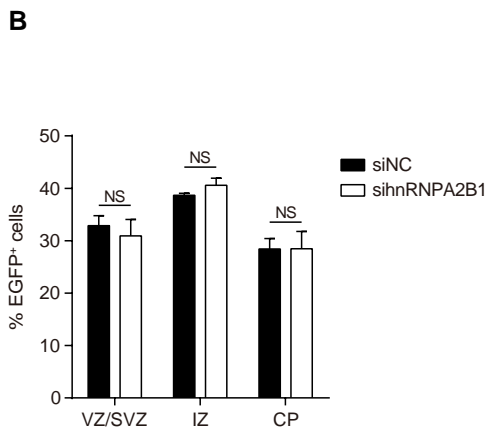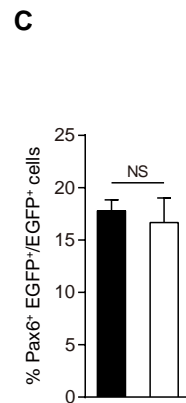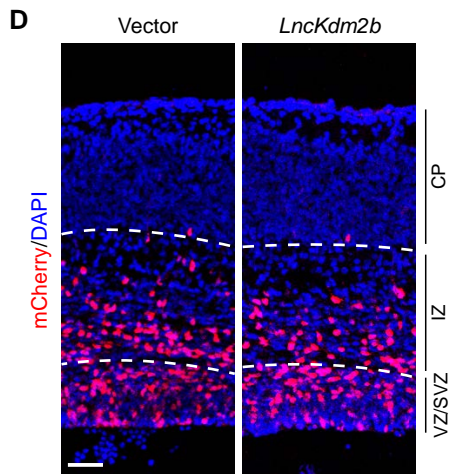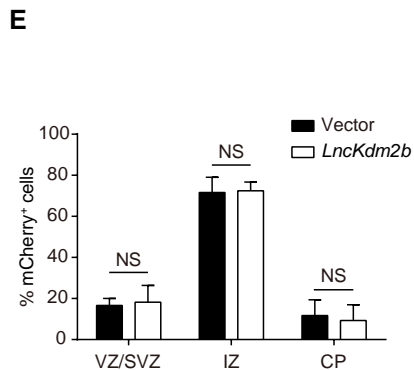

**Figure 7 - figure supplement 1**
